# Supplementary material for: Chemoreceptor co-expression in Drosophila melanogaster olfactory neurons
Source: eLife journal article supplement (doi:10.7554/elife.72599), 2022-03-08

*Orco-T2A-QF2*

Anterior

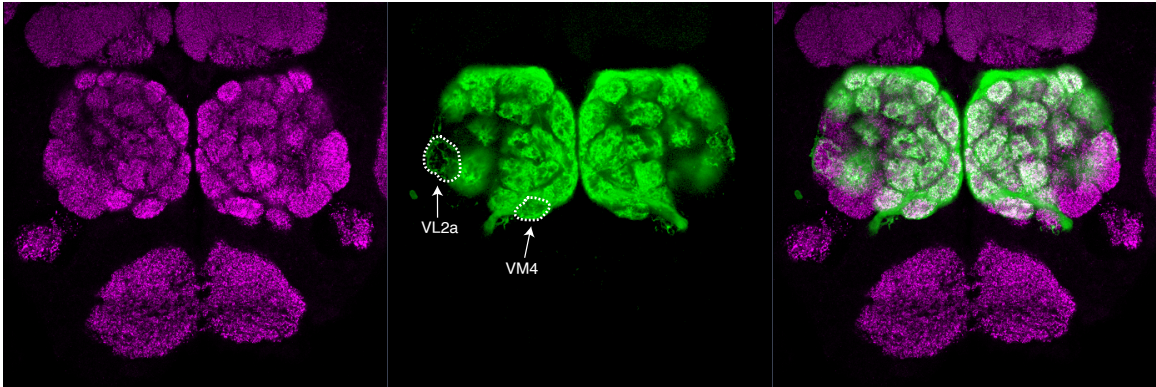

Example Brain 1

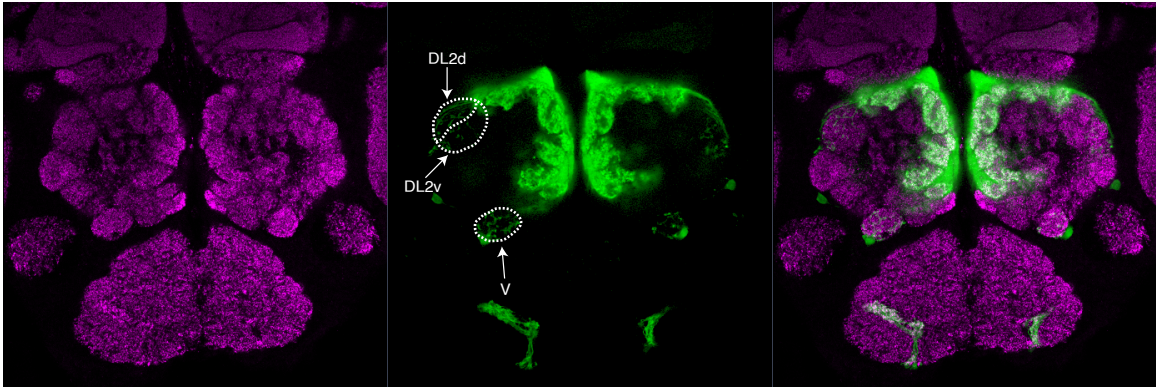

Posterior

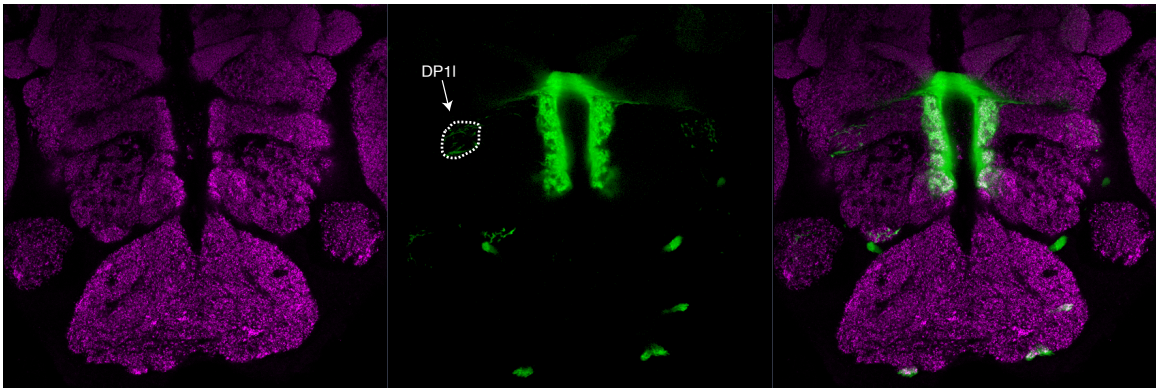

Example Brain 2,  
Posterior

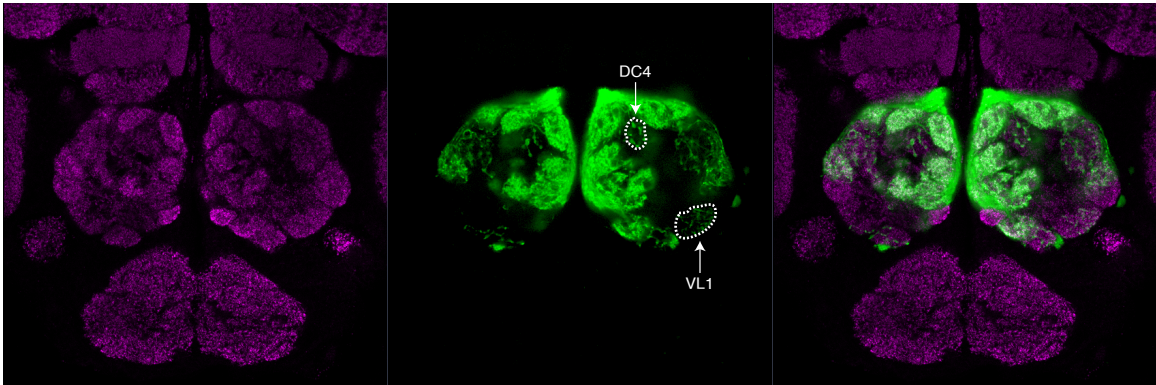

*Ir8a-T2A-QF2*

Anterior

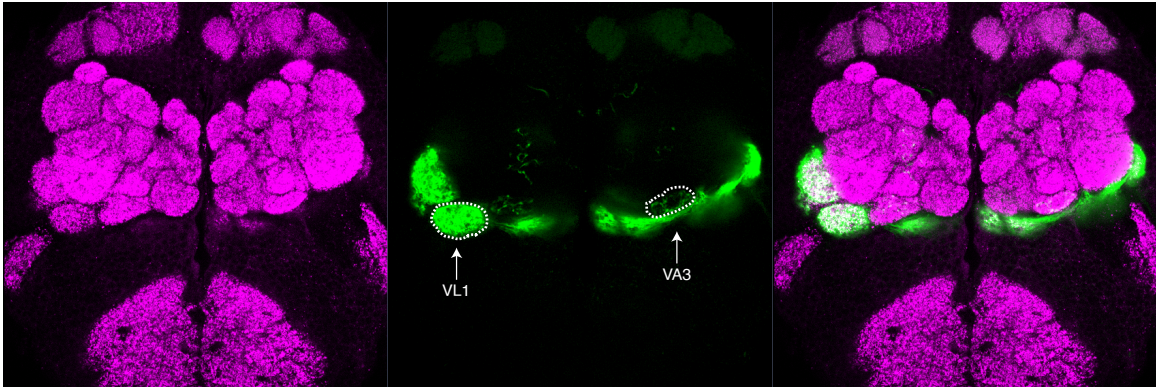

Example Brain 1

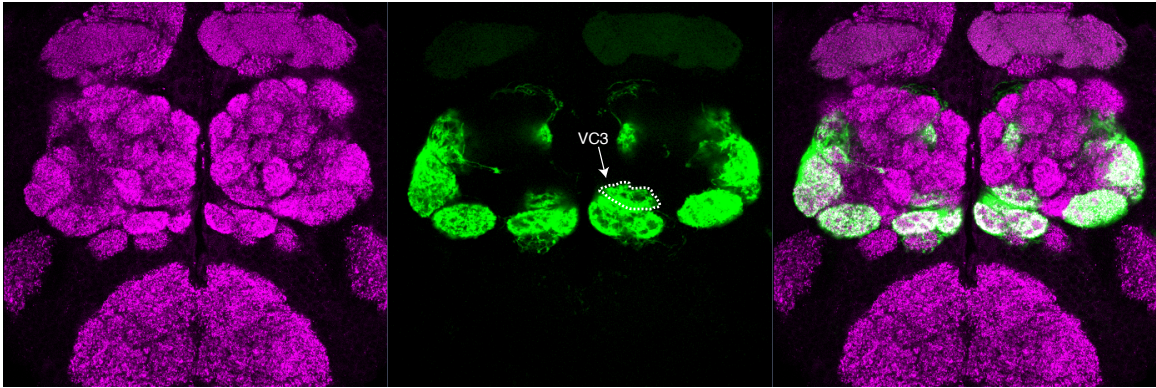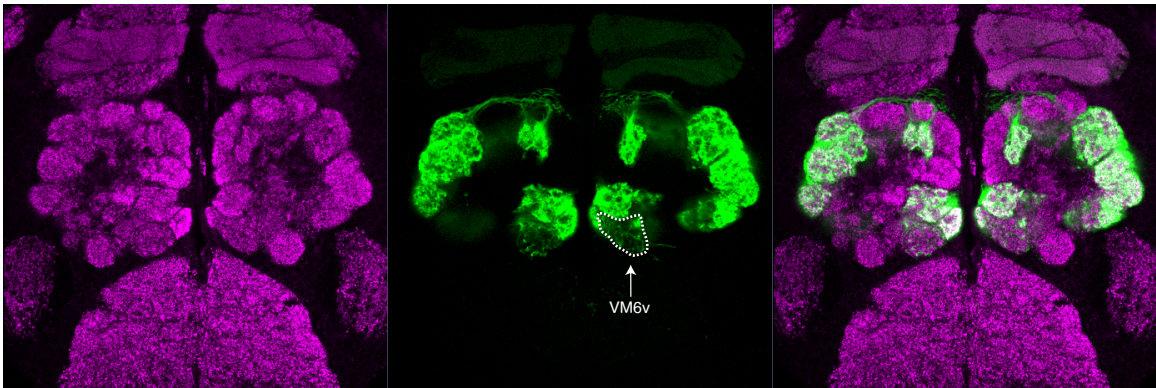

Posterior

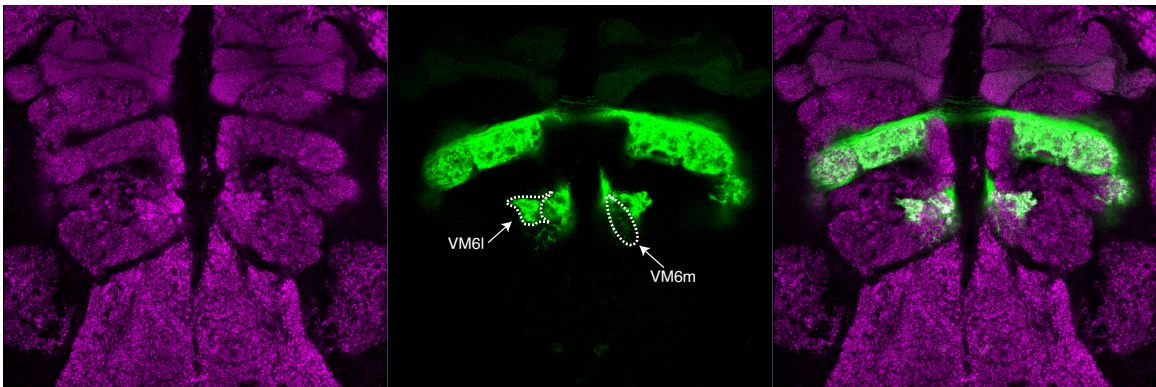

*Ir8a-T2A-QF2*

Example Brain 2  
Anterior

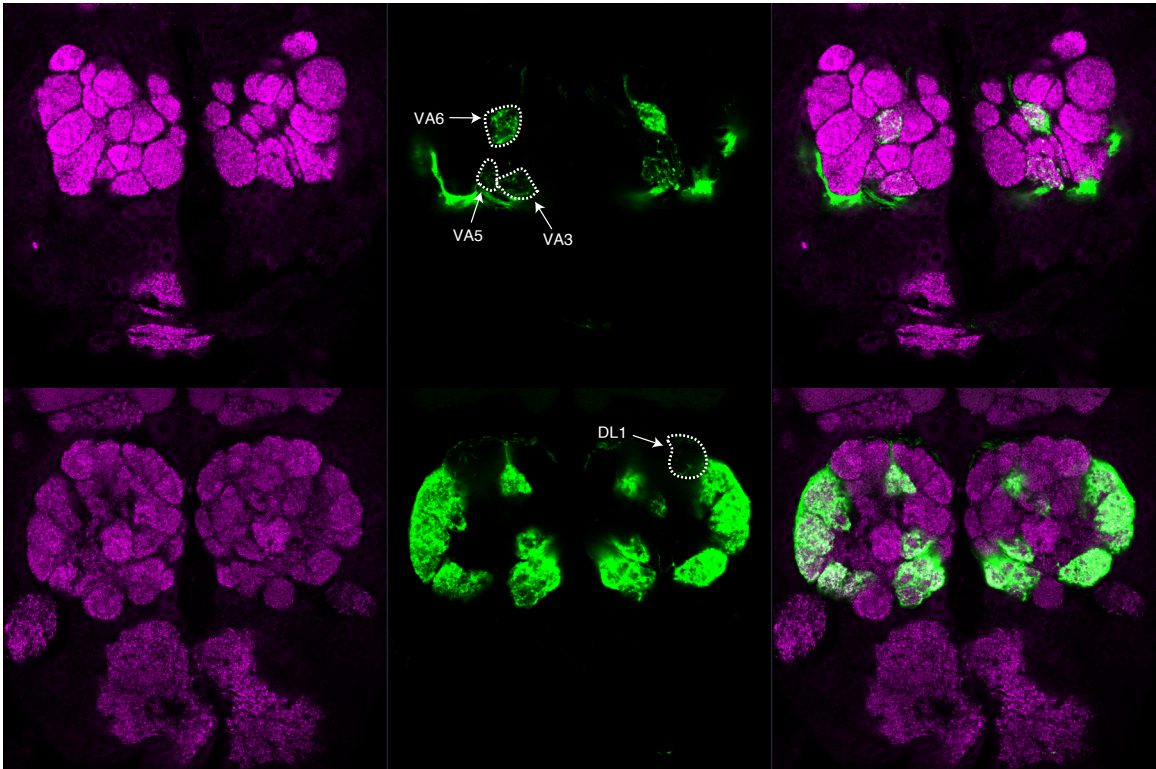

Example Brain 2  
Posterior

Example Brain 3

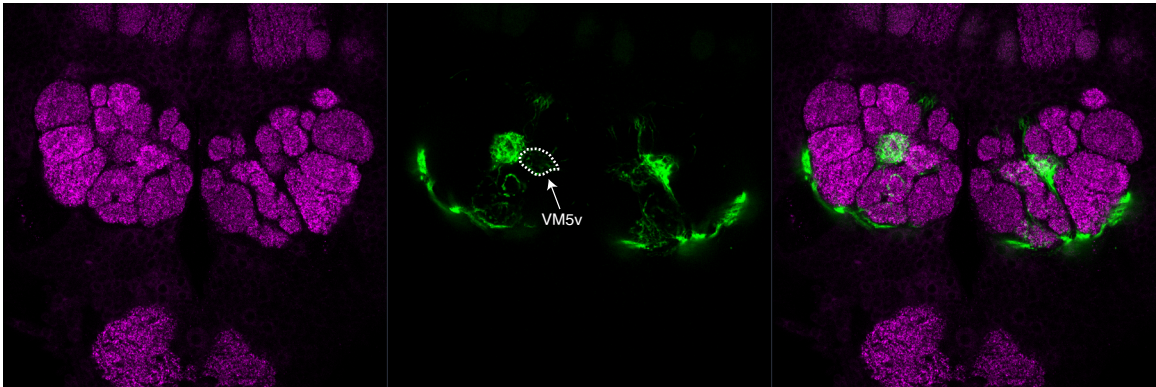

Male and Female Examples  
of VM6 cluster (left AL)

Male

Female

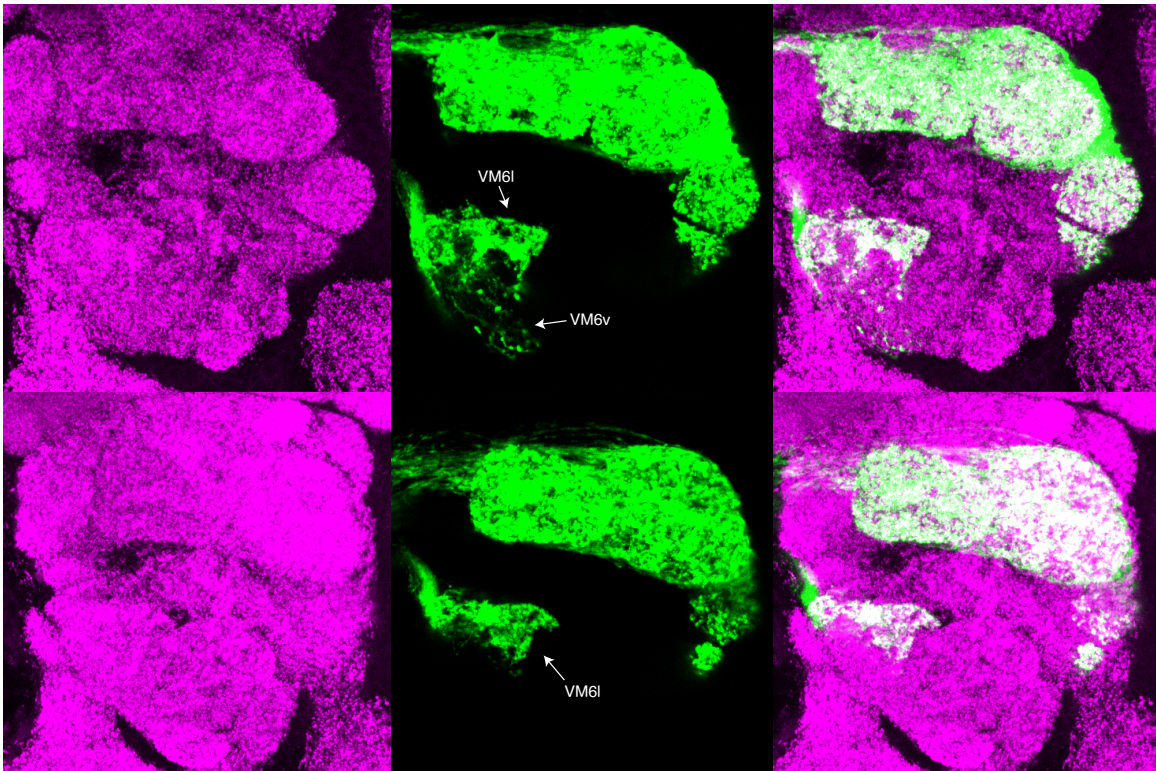

*Ir76b-T2A-QF2*

Example Brain 1  
Anterior

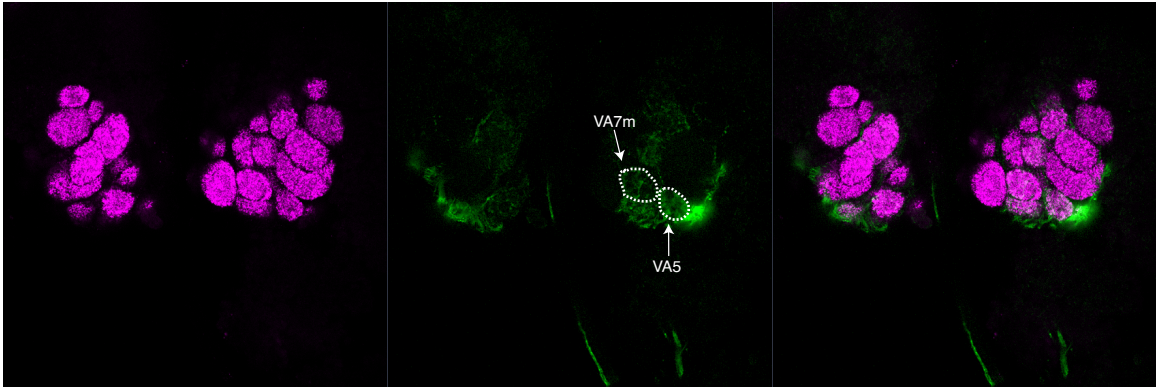

Anterior

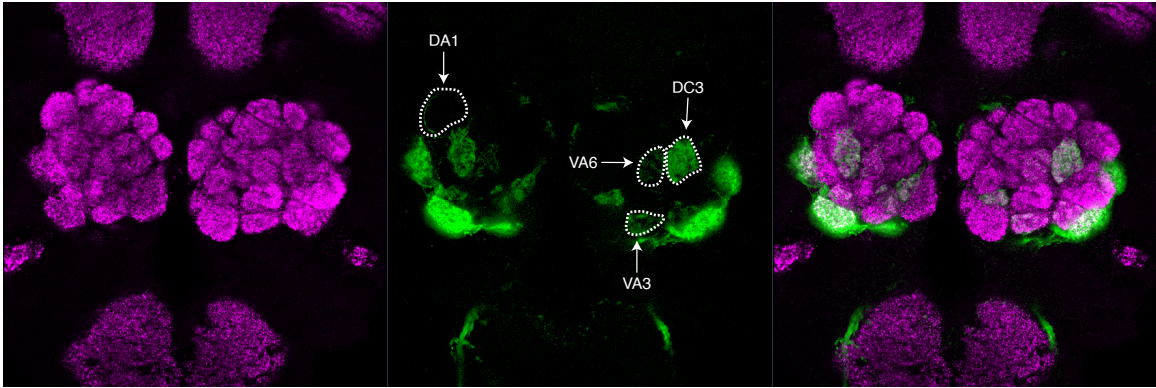

Example Brain 2

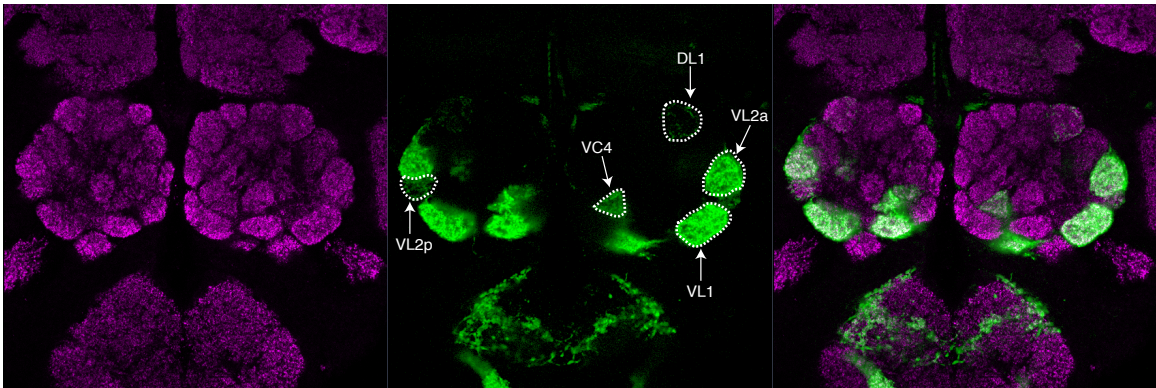

Posterior

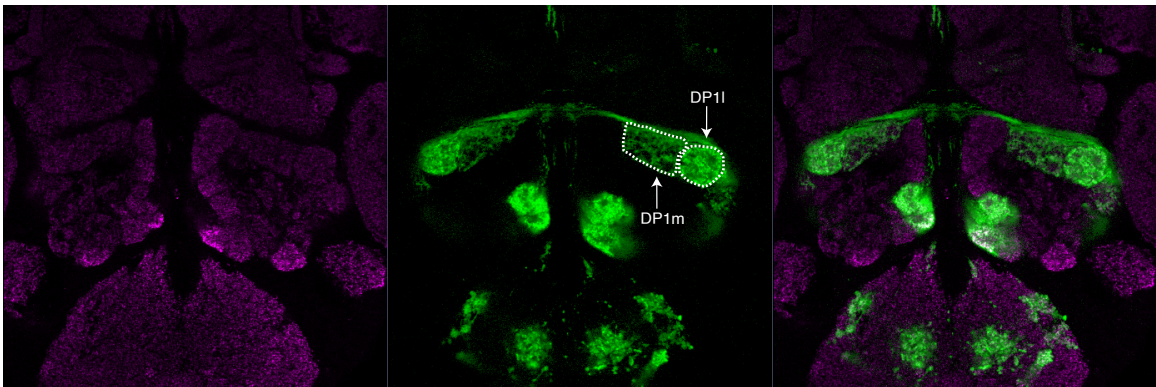

*Ir25a-T2A-QF2*

Anterior

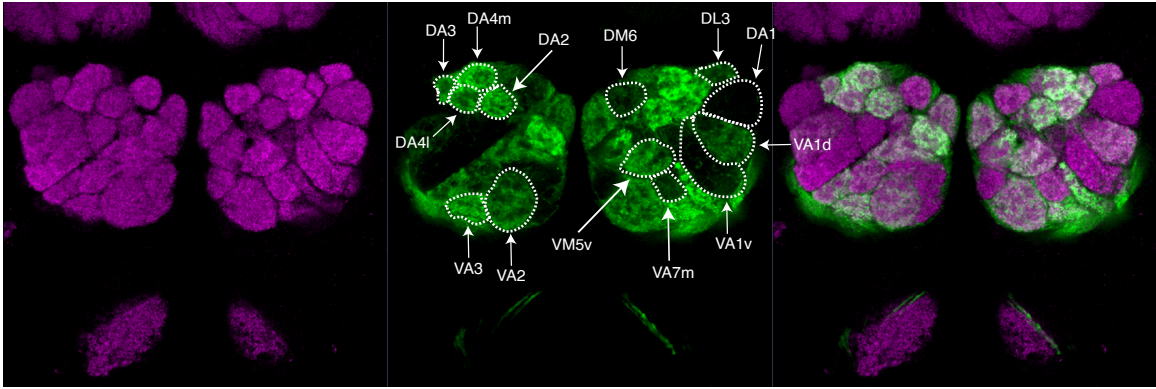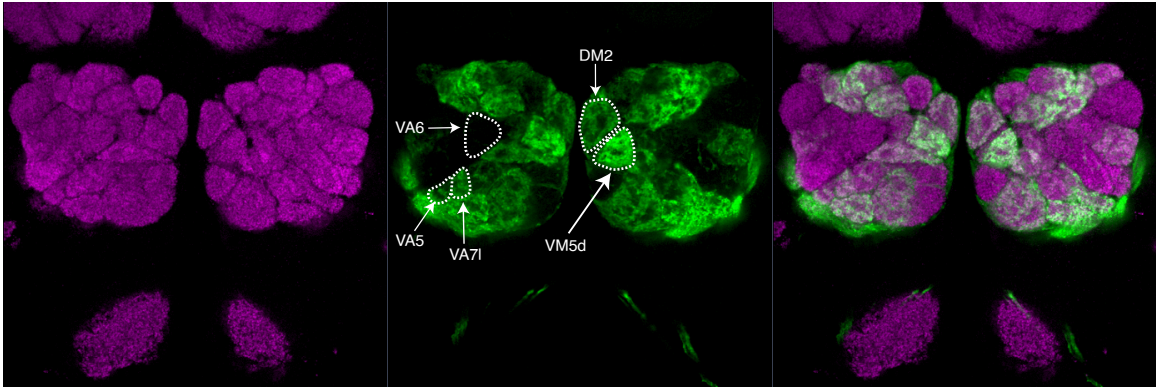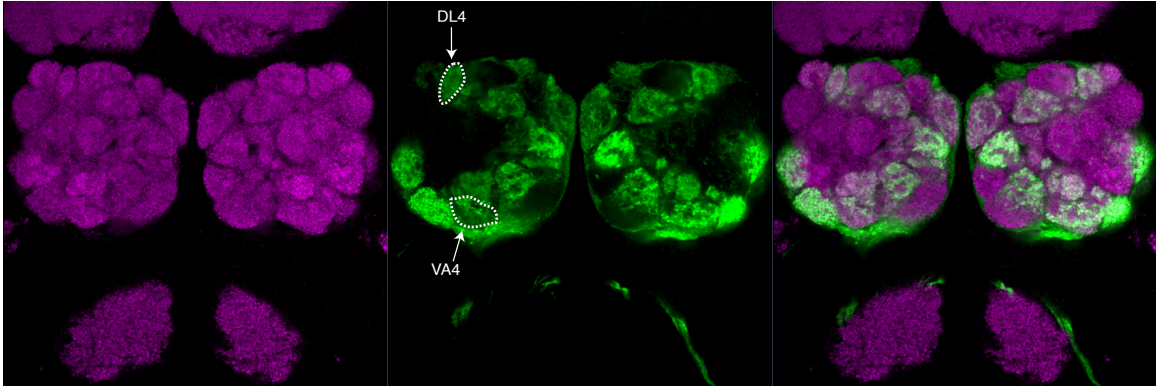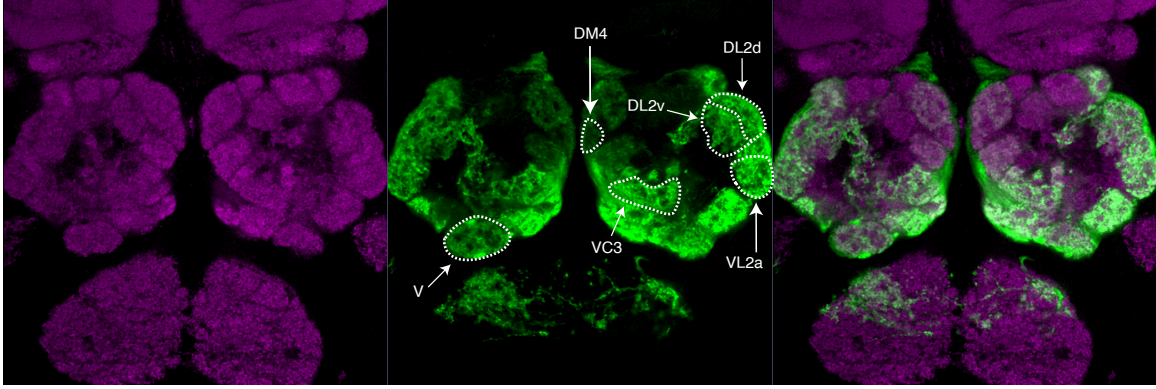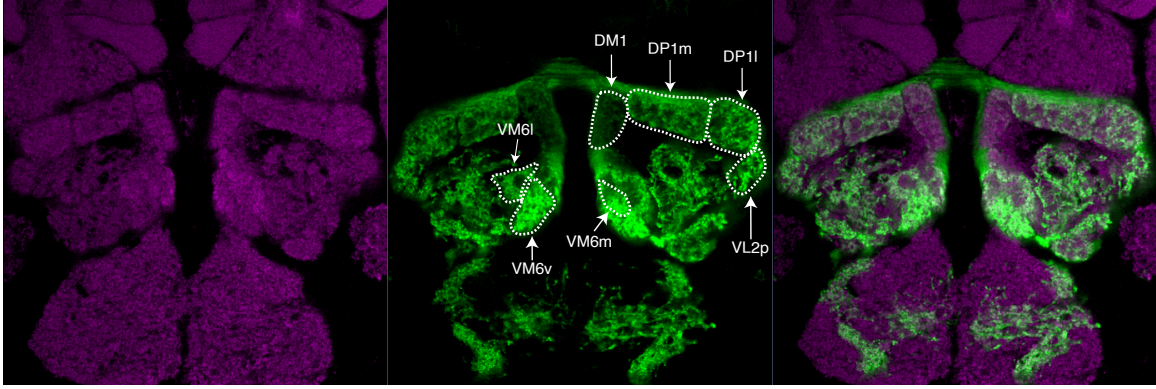

Example Brain 1

Posterior

*Ir25a-T2A-QF2*

Anterior

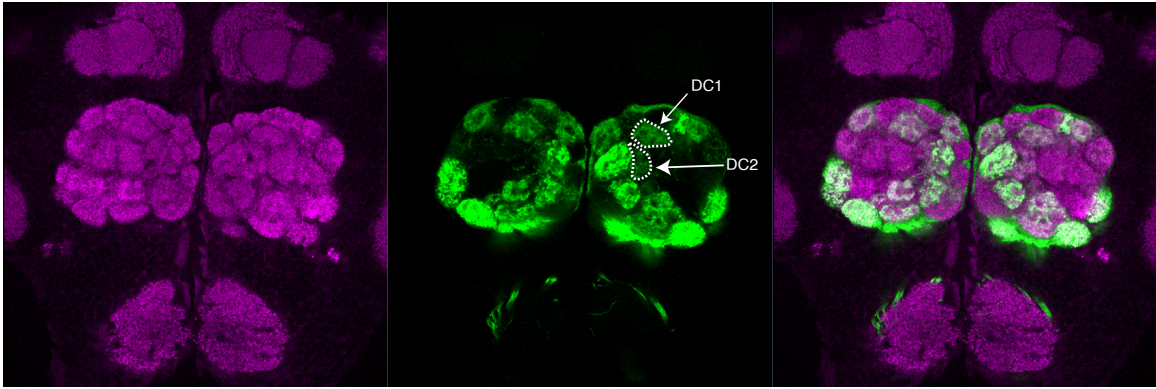

Example Brain 2

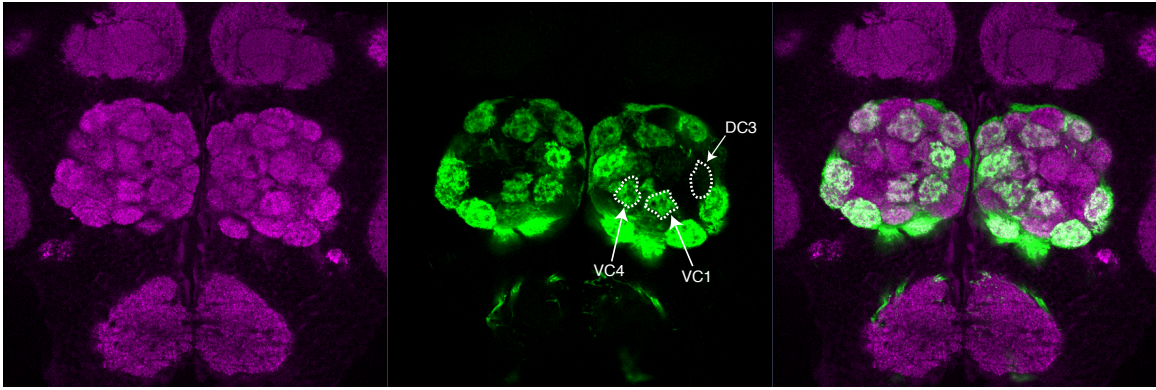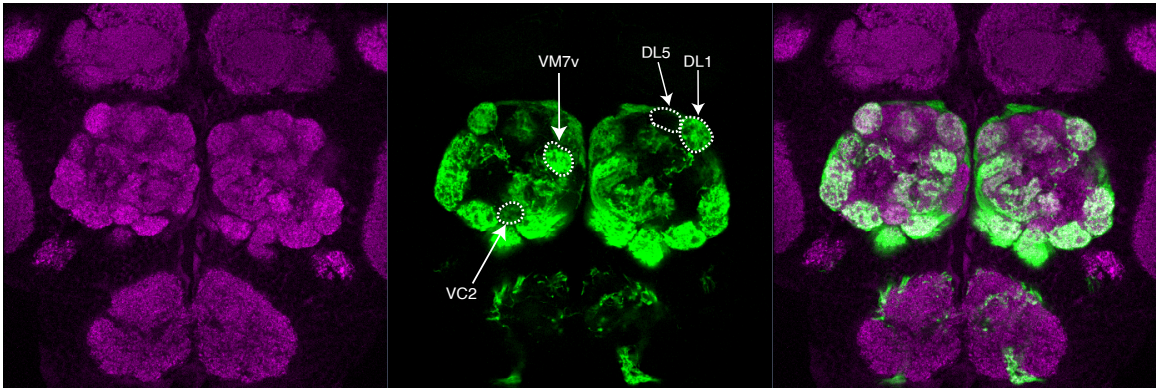

Posterior

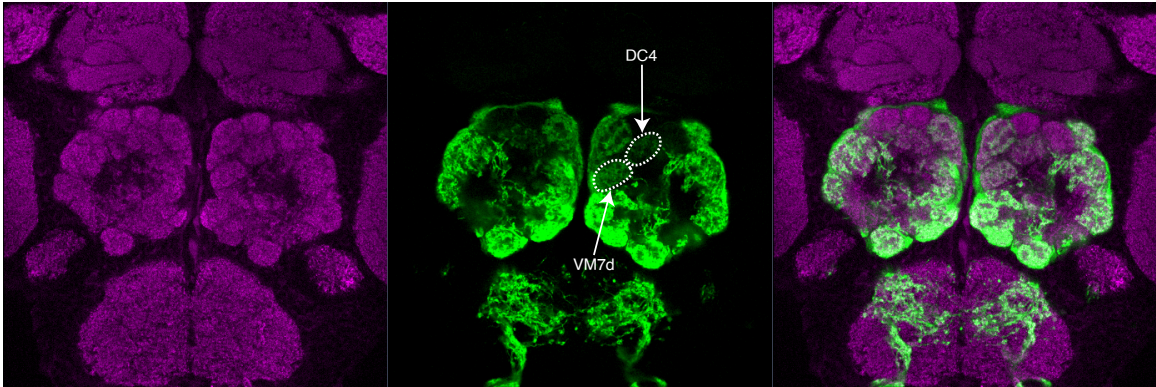

Supplement: fig3-data2 [file elife-72599-fig3-data2-v2.pdf]
