# Supplementary material for: Chemoreceptor co-expression in Drosophila melanogaster olfactory neurons
Source: eLife. 2022 Apr 20;11:e72599. doi: 10.7554/eLife.72599 (PMC9020824; doi:10.7554/eLife.72599)
Supplement: Figure 2—source data 1. [file elife-72599-fig2-data1.xlsx]

## Sheet: Orco KI ab2 Raw Data
A NEURON
MO		EA		PA		EB		MS		Hex		1O3O		E2Hex		23But		GA		2hep
WT	KI	WT	KI	WT	KI	WT	KI	WT	KI	WT	KI	WT	KI	WT	KI	WT	KI	WT	KI	WT	KI
-3	0	73	73	29	?	23	27	7	0	4	15	4	0	-2	1	80	56	35	8	11	0
2	0	60	54	35	15	22	14	6	-4	2	17	5	7	4	10	60	34	24	6	7	5
12	0	56	75	16	18	17	19	3	2	3	5	1	-2	2	-1	57	49	26	33	6	16
5	2	62	42	20	15	24	19	2	2	10	6	2	0	3	6	35	30	18	10	4	3
0	0	58	60	23	25	30	22	0	0	22	0	-5	0	7	0	37	66	7	23	4	11
	0		50		?		17		0		0		0		0		36		?		?
B NEURON
MO		EA		PA		EB		MS		Hex		1O3O		E2Hex		23But		GA		2hep			Excluded
WT	KI	WT	KI	WT	KI	WT	KI	WT	KI	WT	KI	WT	KI	WT	KI	WT	KI	WT	KI	WT	KI
-3	0	NA	NA	NA	5	66	46	1	-4	40	39	10	11	3	4	NA	NA	-1	0	-1	3
1	2	NA	NA	NA	NA	53	38	-1	3	50	35	2	13	6	-3	NA	NA	-5	0	4	12
3	0	NA	NA	NA	NA	40	43	-2	1	31	33	2	16	0	0	NA	NA	-3	0	2	-2
-1	1	NA	NA	NA	NA	38	37	0	0	37	31	2	0	1	-1	NA	NA	1	2	-2	1
1	1	NA	NA	NA	NA	50	40	-3	1	38	28	16	7	3	0	NA	NA	0	-2	6	2
	-2		NA		7		41		2		29		5		0		NA		?		?

## Sheet: Orco KI ab2 Analyses
ab2a two geno (KI v WT), Mann Whitney tests	MO	Ethyl acetate	Pentyl acetate	Ethyl butyrate	Methyl salicylate	Hexanol	1-octen-3-ol	e2-hexenal	2,3-butanedione	geranyl acetate	2-heptanone
P value	0.3463	0.632	0.1746	0.2208	0.0649	0.881	0.3853	0.7532	0.329	0.4206	0.8968
Exact or approximate P value?	Exact	Exact	Exact	Exact	Exact	Exact	Exact	Exact	Exact	Exact	Exact
P value summary	ns	ns	ns	ns	ns	ns	ns	ns	ns	ns	ns
Significantly different (P < 0.05)?	No	No	No	No	No	No	No	No	No	No	No
One- or two-tailed P value?	Two-tailed	Two-tailed	Two-tailed	Two-tailed	Two-tailed	Two-tailed	Two-tailed	Two-tailed	Two-tailed	Two-tailed	Two-tailed
Sum of ranks in column A,B	35 , 31	33 , 33	31 , 14	37 , 29	40.50 , 25.50	31 , 35	35 , 31	32 , 34	36 , 30	32 , 23	28.50 , 26.50
Mann-Whitney U	10	12	4	8	4.5	14	10	13	9	8	11.5
Difference between medians:
Median of column A	2.000, n=5	60.00, n=5	23.00, n=5	23.00, n=5	3.000, n=5	4.000, n=5	2.000, n=5	3.000, n=5	57.00, n=5	24.00, n=5	6.000, n=5
Median of column B	0.000, n=6	57.00, n=6	16.50, n=4	19.00, n=6	0.000, n=6	5.500, n=6	0.000, n=6	0.5000, n=6	42.50, n=6	10.00, n=5	5.000, n=5
Difference: Actual	-2	-3	-6.5	-4	-3	1.5	-2	-2.5	-14.5	-14	-1
Difference: Hodges-Lehmann	-2	-3	-5	-3.5	-3.5	-2	-2	-1.5	-6	-8	-1
ab2b two geno (KI v WT), Mann Whitney tests	MO	Ethyl butyrate	Methyl salicylate	Hexanol	1-octen-3-ol	e2-hexenal	geranyl acetate	2-heptanone
P value	>0.9999	0.2316	0.197	0.0909	0.5736	0.0909	0.3651	0.9683
Exact or approximate P value?	Exact	Exact	Exact	Exact	Exact	Exact	Exact	Exact
P value summary	ns	ns	ns	ns	ns	ns	ns	ns
Significantly different (P < 0.05)?	No	No	No	No	No	No	No	No
One- or two-tailed P value?	Two-tailed	Two-tailed	Two-tailed	Two-tailed	Two-tailed	Two-tailed	Two-tailed	Two-tailed
Sum of ranks in column A,B	30 , 36	37 , 29	22.50 , 43.50	39.50 , 26.50	26.50 , 39.50	39.50 , 26.50	22.50 , 32.50	27 , 28
Mann-Whitney U	15	8	7.5	5.5	11.5	5.5	7.5	12
Difference between medians:
Median of column A	1.000, n=5	50.00, n=5	-1.000, n=5	38.00, n=5	2.000, n=5	3.000, n=5	-1.000, n=5	2.000, n=5
Median of column B	0.5000, n=6	40.50, n=6	1.000, n=6	32.00, n=6	9.000, n=6	0.000, n=6	0.000, n=5	2.000, n=5
Difference: Actual	-0.5	-9.5	2	-6	7	-3	1	0
Difference: Hodges-Lehmann	0	-8	2	-6.5	3	-3	1	0

## Sheet: Ir8a KI ac2 Raw Data
All female flies, aged 5-7 days. Selected against cyo and tm6b when possible (noted in file name). Odors used at 10^-2 unless otherwise noted															Solvent subtracted
spikes counted from .1s after odor application, for .5s
w1118 line is Iso D1
ir8a t2a is IR8a-T2A-QF2/ FM7C; Pin/Cyo; Dh floating
Date	File	Line #	hexanol-5	1,4 diaminobutane	paraffin oil	2,3 butanedione	h2o	acetic acid	cadaverine	nh3-3	phenylethylamine	propanal			hexanol-5	1,4 diaminobutane	2,3 butanedione	acetic acid	cadaverine	nh3-3	phenylethylamine	propanal
08_10_20	w1118 control fly1 s1 ac2	718	45	103	36	122	30	58	128	58	15	74			18	146	172	56	196	56	-42	76
08_10_20	w1118 control fly1 s2 ac2	718	30	124	30	111	25	71	130	19	13	75			0	198	162	92	210	-12	-34	90
08_10_20	w1118 control fly2 s1 ac2	718	49	113	52	120	30	76	127	70	4	69			-6	166	136	92	194	80	-96	34
08_10_20	w1118 control fly2 s2 ac2	718	44	112	42	110	38	67	117	34	3	65			4	148	136	58	158	-8	-78	46
08_12_20	w1118 control fly2 s1 ac2	718	47	125	40	132	34	72	129	10	0	78			14	182	184	76	190	-48	-80	76
08_13_20	w1118control fly1 s1 ac2	718	45	118	37	136	29	72	140	42	0	68			16	178	198	86	222	26	-74	62
08_13_20	w1118 control fly1 s2 ac2	718	26	135	27	127	21	61	132	17	0	74			-2	228	200	80	222	-8	-54	94
														average	6.28571	178	169.714	77.1429	198.857	12.2857	-65.4286	68.2857
08_10_20	710 ir8a t2a fly1 s1 ac2	710	48	125	44	137	28	91	127	28	0	86			8	194	186	126	198	0	-88	84
08_10_20	710 ir8a t2a fly1 s2 ac2	710	43	120	37	136	22	97	117	25	1	88			12	196	198	150	190	6	-72	102
08_10_20	710 ir8a t2a fly2 s1 ac2	710	48	114	51	137	28	95	115	30	0	76			-6	172	172	134	174	4	-102	50
08_10_20	710 ir8a t2a fly2 s2 ac2	710	38	130	46	134	26	92	103	24	1	75			-16	208	176	132	154	-4	-90	58
08_13_20	710 ir8a t2a fly1 s1 ac2	710	33	127	36	83	8	42	81	38	0	47			-6	238	94	68	146	60	-72	22
08_13_20	710 ir8a t2a fly1 s2 ac2	710	6	109	11	47	7	15	35	11	1	42			-10	204	72	16	56	8	-20	62
08_13_20	710 ir8a t2a fly2 s1 ac2	710	6	107	10	58	6	35	50	21	1	50			-8	202	96	58	88	30	-18	80
08_13_20	710 ir8a t2a fly2 s2 ac2	710	23	137	29	99	13	69	75	27	13	76			-12	248	140	112	124	28	-32	94
														average	-4.75	207.75	141.75	99.5	141.25	16.5	-61.75	69

## Sheet: Ir8a KI ac2 Analyses
Ir8a ac2 two geno (KI v WT), Mann Whitney tests	Hexanol	Phenylethylamine	Ammonia	Propanal	1,4 diaminobutane	Cadaverine	2,3 butanedione	Acetic acid
P value	0.0286	0.7559	0.3793	0.844	0.0541	0.0106	0.3812	0.242
Exact or approximate P value?	Exact	Exact	Exact	Exact	Exact	Exact	Exact	Exact
P value summary	*	ns	ns	ns	ns	*	ns	ns
Significantly different (P < 0.05)?	Yes	No	No	No	No	Yes	No	No
One- or two-tailed P value?	Two-tailed	Two-tailed	Two-tailed	Two-tailed	Two-tailed	Two-tailed	Two-tailed	Two-tailed
Sum of ranks in column A,B	75 , 45	53 , 67	48 , 72	54 , 66	39 , 81	77.50 , 42.50	64 , 56	45.50 , 74.50
Mann-Whitney U	9	25	20	26	11	6.5	20	17.5
Difference between medians:
Median of column A	4.000, n=7	-74.00, n=7	-8.000, n=7	76.00, n=7	178.0, n=7	196.0, n=7	172.0, n=7	80.00, n=7
Median of column B	-7.000, n=8	-72.00, n=8	7.000, n=8	71.00, n=8	203.0, n=8	150.0, n=8	156.0, n=8	119.0, n=8
Difference: Actual	-11	2	15	-5	25	-46	-16	39
Difference: Hodges-Lehmann	-10	4	10	4	27	-48	-23	38

## Sheet: Ir76b KI ac2 Raw Data
All female flies, aged 5-7 days. Selected against balancers (no tm6b). Odors used at 10^-2 unless otherwise noted															Solvent subtracted
spikes counted from .1s after odor application, for .5s.
wiso line is Iso D1
line #848 is IR76b-T2A-QF2 (RFP+) o/c 5x/ TM6B outcrossed 5x to Iso D1
Date	File	Line #	hexanol-5	1,4 diaminobutane	paraffin oil	2,3 butanedione	h2o	acetic acid	cadaverine	nh3-3	phenylethylamine	propanal			hexanol-5	1,4 diaminobutane	2,3 butanedione	acetic acid	cadaverine	nh3-3	phenylethylamine	propanal
11_30_2020	ir76b t2a outcrossed fly1 s1 ac2	848	28	135	35	107	20	74	98	12	6	85			-14	230	144	108	156	-16	-58	100
11_30_2020	ir76b t2a outcrossed fly1 s2 ac2	848	32	139	35	109	26	84	82	10	6	84			-6	226	148	116	112	-32	-58	98
11_30_2020	ir76b t2a outcrossed fly2 s1 ac2	848	39		28	111	17	73	95	9	7	89			22		166	112	156	-16	-42	122
11_30_2020	ir76b t2a outcrossed fly2 s2 ac2	848	46	134	42	111	22	79	102	24	6	92			8	224	138	114	160	4	-72	100
12_01_2020	ir76b t2a outcrossed fly1 s1 ac2	848	35	119	38	83	33	68	110	5	0	65			-6	172	90	70	154	-56	-76	54
12_01_2020	ir76b t2a outcrossed fly1 s2 ac2	848	37	116	42	85	29	74	114	11	2	72			-10	174	86	90	170	-36	-80	60
12_01_2020	ir76b t2a outcrossed fly2 s1 ac2	848	39	122	37	95	28	68	118	10	1	82			4	188	116	80	180	-36	-72	90
12_01_2020	ir76b t2a outcrossed fly2 s2 ac2	848	50	129	52	96	21	78	129	29	0	78			-4	216	88	114	216	16	-104	52
														average	-0.75	204.286	122	100.5	163	-21.5	-70.25	84.5
11_30_2020	wiso control fly1 s1 ac2	718	36	117	31	107	32	65	70	15	3	63			10	170	152	66	76	-34	-56	64
11_30_2020	wiso control fly1 s2 ac2	718	23	123	25	120	15	59	95	17	5	75			-4	216	190	88	160	4	-40	100
11_30_2020	wiso control fly1 s3 ac2	718	27	125	24	131	15	63	102	10	5	80			6	220	214	96	174	-10	-38	112
12_01_2020	wiso control fly1 s1 ac2	718	35	120	42	83	35	60	90	16	10	68			-14	170	82	50	110	-38	-64	52
12_01_2020	wiso control fly1 s2 ac2	718	32	129	35	89	27	52	94	16	3	66			-6	204	108	50	134	-22	-64	62
12_01_2020	wiso control fly2 s1 ac2	718	32	128	29	90	27	50	95	16	11	58			6	202	122	46	136	-22	-36	58
12_01_2020	wiso control fly2 s2 ac2	718	35	134	24	106	23	62	69	24	15	72			22	222	164	78	92	2	-18	96
														average	2.85714	200.571	147.429	67.7143	126	-17.1429	-45.1429	77.7143

## Sheet: Ir76b KI ac2 Analyses
Ir76b ac2 two geno (KI v WT), Mann Whitney tests	Hexanol	Phenylethylamine	Ammonia	Propanal	1,4 diaminobutane	Cadaverine	2,3 butanedione	Acetic acid
P value	0.4821	0.012	0.8025	0.8064	0.4009	0.0771	0.3357	0.0087
Exact or approximate P value?	Exact	Exact	Exact	Exact	Exact	Exact	Exact	Exact
P value summary	ns	*	ns	ns	ns	ns	ns	**
Significantly different (P < 0.05)?	No	Yes	No	No	No	No	No	Yes
One- or two-tailed P value?	Two-tailed	Two-tailed	Two-tailed	Two-tailed	Two-tailed	Two-tailed	Two-tailed	Two-tailed
Sum of ranks in column A,B	62.50 , 57.50	77 , 43	58.50 , 61.50	53.50 , 66.50	45.50 , 59.50	40.50 , 79.50	65 , 55	34 , 86
Mann-Whitney U	21.5	7	25.5	25.5	17.5	12.5	19	6
Difference between medians:
Median of column A	6.000, n=7	-40.00, n=7	-22.00, n=7	64.00, n=7	204.0, n=7	134.0, n=7	152.0, n=7	66.00, n=7
Median of column B	-5.000, n=8	-72.00, n=8	-24.00, n=8	94.00, n=8	216.0, n=7	158.0, n=8	127.0, n=8	110.0, n=8
Difference: Actual	-11	-32	-2	30	12	24	-25	44
Difference: Hodges-Lehmann	-2	-22	-4	2	4	36	-23	32

## Sheet: Ir25a KI ac2 Raw Data
All female flies, aged 5-7 days. Selected against balancers (no cyo). Odors used at 10^-2 unless otherwise noted															Solvent subtracted
spikes counted from .1s after odor application, for .5s.
wiso line is Iso D1
line #834 is Ir25a-T2A-QF2/Cyo outcrossed 8x to Iso d1
Date	File	Line #	hexanol-5	1,4 diaminobutane	paraffin oil	2,3 butanedione	h2o	acetic acid	cadaverine	nh3-3	phenylethylamine	propanal			hexanol-5	1,4 diaminobutane	2,3 butanedione	acetic acid	cadaverine	nh3-3	phenylethylamine	propanal
11_05_2020	ir25a t2a outcrossed fly1 s1 ac2	834	24	23	19	84	9	55	19	9	1	52			10	28	130	92	20	0	-36	66
11_05_2020	ir25a t2a outcrossed fly1 s2 ac2	834	13	20	13	80	12	57	23	3	2	57			0	16	134	90	22	-18	-22	88
11_09_2020	ir25a t2a outcrossed fly1 s1 ac2	834	27	18	15	93	11	46	17	18	3	55			24	14	156	70	12	14	-24	80
11_09_2020	ir25a t2a outcrossed fly1 s2 ac2	834	17	21	22	98	13	44	17	6	2	57			-10	16	152	62	8	-14	-40	70
11_20_2020	ir25a t2a outcrossed fly1 s1 ac2	834	27	17	12	47	16	32	11	19	5	55			30	2	70	32	-10	6	-14	86
11_20_2020	ir25a t2a outcrossed fly1 s2 ac2	834	25	34	34	85	33	58	28	24	9	68			-18	2	102	50	-10	-18	-50	68
11_20_2020	ir25a t2a outcrossed fly1 s3 ac2	834	19	20	26	75	15	51	23	31	12	57			-14	10	98	72	16	32	-28	62
														average	3.14286	12.5714	120.286	66.8571	8.28571	0.285714	-30.5714	74.2857
11_05_2020	wiso fly1 s1 ac2	718	37	93	35	68	29	60	112	61	8	63			4	128	66	62	166	64	-54	56
11_05_2020	wiso fly1 s2 ac2	718	43	124	35	129	17	83	96	45	2	82			16	214	188	132	158	56	-66	94
11_05_2020	wiso fly1 s1 ac2	718	33	111	36	122	21	70	97	17	1	85			-6	180	172	98	152	-8	-70	98
11_09_2020	wiso fly1 s1 ac2	718	12	104	24	110	9	46	99	21	7	102			-24	190	172	74	180	24	-34	156
11_20_2020	wiso fly1 s1 ac2	718	33	120	26	125	17	80	pinch	67	4	111			14	206	198	126		100	-44	170
11_20_2020	wiso fly1 s2 ac2	718	13	100	25	105	10	36	96	23	7	101			-24	180	160	52	172	26	-36	152
														average	-3.33333	183	159.333	90.6667	165.6	43.6667	-50.6667	121

## Sheet: Ir25a KI ac2 Analyses
Ir25a ac2 two geno (KI v WT), Mann Whitney tests	Hexanol	Phenylethylamine	Ammonia	Propanal	1,4 diaminobutane	Cadaverine	2,3 butanedione	Acetic acid
P value	0.5967	0.039	0.0338	0.0513	0.0012	0.0025	0.0472	0.1929
Exact or approximate P value?	Exact	Exact	Exact	Exact	Exact	Exact	Exact	Exact
P value summary	ns	*	*	ns	**	**	*	ns
Significantly different (P < 0.05)?	No	Yes	Yes	No	Yes	Yes	Yes	No
One- or two-tailed P value?	Two-tailed	Two-tailed	Two-tailed	Two-tailed	Two-tailed	Two-tailed	Two-tailed	Two-tailed
Sum of ranks in column A,B	38 , 53	27.50 , 63.50	57 , 34	56 , 35	63 , 28	50 , 28	56 , 35	51.50 , 39.50
Mann-Whitney U	17	6.5	6	7	0	0	7	11.5
Difference between medians:
Median of column A	-1.000, n=6	-49.00, n=6	41.00, n=6	125.0, n=6	185.0, n=6	166.0, n=5	172.0, n=6	86.00, n=6
Median of column B	0.000, n=7	-28.00, n=7	0.000, n=7	70.00, n=7	14.00, n=7	12.00, n=7	130.0, n=7	70.00, n=7
Difference: Actual	1	21	-41	-55	-171	-154	-42	-16
Difference: Hodges-Lehmann	7	20	-42	-50	-177	-158	-42	-25
