# Supplementary material for: Chemoreceptor co-expression in Drosophila melanogaster olfactory neurons
Source: eLife. 2022 Apr 20;11:e72599. doi: 10.7554/eLife.72599 (PMC9020824; doi:10.7554/eLife.72599)
Supplement: Figure 3—source data 1. [file elife-72599-fig3-data1.xlsx]

## Sheet: Knock-in Summary
AL Summary (excluding variably labeled glomeruli)						Knock-in	Canonical Co-receptor(s)	Glomerulus		Knock-in	Canonical Co-receptor(s)	Glomerulus		Knock-in	Canonical Co-receptor(s)	Glomerulus		Knock-in	Canonical Co-receptor(s)	Glomerulus
	New Map		Previous Map			Orco	Orco, Ir76b	VC3		Ir8a	Ir8a	DC4		Ir76b	Orco, Ir76b	VC3		Ir25a	Ir25a	VP2
Total Glomeruli:	58	% of Total	58	% of Total		Orco	Orco	D		Ir8a	Ir8a	DL2d		Ir76b	Ir8a, Ir25a, Ir76b	VC5		Ir25a	Ir25a	VP3
Orco+	45	0.775862	38	0.655172		Orco	Orco	DA1		Ir8a	Ir8a	DL2v		Ir76b	Ir8a, Ir25a, Ir76b	VM1		Ir25a	Ir25a	VP4
Ir8a+	18	0.310345	10	0.172414		Orco	Orco	DA2		Ir8a	Ir8a	DP1l		Ir76b	Ir8a, Ir25a, Ir76b	VM4		Ir25a	Ir25a	VP1d
Ir76b+	15	0.258621	4	0.0689655		Orco	Orco	DA3		Ir8a	Ir8a	DP1m		Ir76b	Ir25a	VL1		Ir25a	Ir25a	VP1l
Ir25a+	51	0.87931	12	0.206897		Orco	Orco	DA4l		Ir8a	Ir8a	VL2a		Ir76b	Ir8a	VL2a		Ir25a	Ir25a	VP1m
						Orco	Orco	DA4m		Ir8a	Ir8a	VL2p		Ir76b	Ir8a	DP1l		Ir25a	Ir25a	VP5
						Orco	Orco	DC1		Ir8a	Ir8a, Ir25a, Ir76b	VC5		Ir76b	Ir8a	DP1m		Ir25a	Ir25a	VL1
						Orco	Orco	DC2		Ir8a	Ir8a, Ir25a, Ir76b	VM1		Ir76b	Ir8a	VL2p		Ir25a	Ir25a	VM6v*
						Orco	Orco	DC3		Ir8a	Ir8a, Ir25a, Ir76b	VM4		Ir76b	Orco	DC3		Ir25a	Ir8a, Ir25a, Ir76b	VC5
						Orco	Orco	DL1		Ir8a	Ir25a	VL1		Ir76b	Orco	VC4		Ir25a	Ir8a, Ir25a, Ir76b	VM1
						Orco	Orco	DL3		Ir8a	Orco, Ir76b	VC3		Ir76b	Orco	VA6		Ir25a	Ir8a, Ir25a, Ir76b	VM4
	Previously Reported					Orco	Orco	DL4		Ir8a	N/A	VM6l*		Ir76b	Orco	DL1		Ir25a	Orco, Ir76b	VC3
	Strong					Orco	Orco	DL5		Ir8a	Orco	VA6		Ir76b	Orco	VA5		Ir25a	Ir8a	VL2a
	Intermediate					Orco	Orco	DM1		Ir8a	Ir25a	VM6v*		Ir76b	Orco	VA3		Ir25a	Ir8a	DL2d
	Weak					Orco	Orco	DM2		Ir8a	N/A	VM6m*		Ir76b	Orco	VA7m		Ir25a	Ir8a	DL2v
	Variable					Orco	Orco	DM3		Ir8a	Orco	VA3		Ir76b	Orco	DA1		Ir25a	Ir8a	DP1l
						Orco	Orco	DM4		Ir8a	Orco	VA5						Ir25a	Ir8a	VL2p
	*New glomerular subdivisions (counted as one glomerulus)					Orco	Orco	DM5		Ir8a	Orco	DL1			Venn Diagram: 15			Ir25a	Ir8a	DP1m
						Orco	Orco	DM6		Ir8a	Orco	VM5v			Max (including variable): 17			Ir25a	GRs	V
						Orco	Orco	VA1d		Ir8a	Orco	D						Ir25a	Orco	DA2
						Orco	Orco	VA1v		Ir8a	Orco	VM5d						Ir25a	Orco	DA4m
						Orco	Orco	VA2										Ir25a	Orco	VM5d
						Orco	Orco	VA3			Venn Diagram: 18 (counting all VM6 subdivisions together)							Ir25a	Orco	DA3
						Orco	Orco	VA4			Max (including variable): 20							Ir25a	Orco	DA4l
						Orco	Orco	VA5										Ir25a	Orco	DL1
						Orco	Orco	VA6										Ir25a	Orco	DL4
						Orco	Orco	VA7l										Ir25a	Orco	VA3
						Orco	Orco	VA7m										Ir25a	Orco	VA5
						Orco	Orco	VC1										Ir25a	Orco	VA7l
						Orco	Orco	VC2										Ir25a	Orco	VC1
						Orco	Orco	VC4										Ir25a	Orco	VC2
						Orco	Orco	VM2										Ir25a	Orco	VC4
						Orco	Orco	VM3										Ir25a	Orco	VA2
						Orco	Orco	VM5d										Ir25a	Orco	VM5v
						Orco	Orco	VM5v										Ir25a	Orco	VM7d
						Orco	Orco	VM7d										Ir25a	N/A	VM6l*
						Orco	Orco	VM7v										Ir25a	N/A	VM6m*
						Orco	Ir8a, Ir25a, Ir76b	VM4										Ir25a	Orco	VM7v
						Orco	Ir8a	VL2a										Ir25a	Orco	DC1
						Orco	Ir8a	DL2d										Ir25a	Orco	DM1
						Orco	Ir8a	DL2v										Ir25a	Orco	DM2
						Orco	Ir8a	DP1l										Ir25a	Orco	VA1d
						Orco	Ir25a	VL1										Ir25a	Orco	VA4
						Orco	GRs	V										Ir25a	Orco	DL3
						Orco	Ir8a	DC4										Ir25a	Orco	DM4
																		Ir25a	Orco	VA7m
							Venn Diagram: 45											Ir25a	Orco	DA1
							Max (including variable): 46											Ir25a	Orco	DC2
																		Ir25a	Orco	DM6
																		Ir25a	Orco	VA6
																		Ir25a	Ir8a	DC4
																		Ir25a	Orco	VA1v
																		Ir25a	Orco	DC3
																		Ir25a	Orco	DL5
																			Venn Diagram: 51 (counting all VM6 subdivisions together)
																			Max (including variable): 53

## Sheet: Orco KI
							Orco-Gal4 > RFP, Orco KI > GFP Co-label
							Brain 1		Brain 2		Brain 3
Glomerulus	Canonical Co-receptor(s)	Brain 1	Brain 2	Brain 3	Brain 4	Brain 5	Gal4	KI	Gal4	KI	Gal4	KI	All Brains	Glomerulus
VC3	Orco, Ir76b	Y	Y	Y	Y	Y	Y	Y	Y	Y	Y	Y	Y	VC3
D	Orco	Y	Y	Y	Y	Y	Y	Y	Y	Y	Y	Y	Y	D
DA1	Orco	Y	Y	Y	Y	Y	Y	Y	Y	Y	Y	Y	Y	DA1
DA2	Orco	Y	Y	Y	Y	Y	Y	Y	Y	Y	Y	Y	Y	DA2
DA3	Orco	Y	Y	Y	Y	Y	Y	Y	Y	Y	Y	Y	Y	DA3
DA4l	Orco	Y	Y	Y	Y	Y	Y	Y	Y	Y	Y	Y	Y	DA4l
DA4m	Orco	Y	Y	Y	Y	Y	Y	Y	Y	Y	Y	Y	Y	DA4m
DC1	Orco	Y	Y	Y	Y	Y	Y	Y	Y	Y	Y	Y	Y	DC1
DC2	Orco	Y	Y	Y	Y	Y	Y	Y	Y	Y	Y	Y	Y	DC2
DC3	Orco	Y	Y	Y	Y	Y	Y	Y	Y	Y	Y	Y	Y	DC3
DL1	Orco	Y	Y	Y	Y	Y	Y	Y	Y	Y	Y	Y	Y	DL1
DL3	Orco	Y	Y	Y	Y	Y	Y	Y	Y	Y	Y	Y	Y	DL3
DL4	Orco	Y	Y	Y	Y	Y	Y	Y	Y	Y	Y	Y	Y	DL4
DL5	Orco	Y	Y	Y	Y	Y	Y	Y	Y	Y	Y	Y	Y	DL5
DM1	Orco	Y	Y	Y	Y	Y	Y	Y	Y	Y	Y	Y	Y	DM1
DM2	Orco	Y	Y	Y	Y	Y	Y	Y	Y	Y	Y	Y	Y	DM2
DM3	Orco	Y	Y	Y	Y	Y	Y	Y	Y	Y	Y	Y	Y	DM3
DM4	Orco	Y	Y	Y	Y	Y	Y	Y	Y	Y	Y	Y	Y	DM4
DM5	Orco	Y	Y	Y	Y	Y	Y	Y	Y	Y	Y	Y	Y	DM5
DM6	Orco	Y	Y	Y	Y	Y	Y	Y	Y	Y	Y	Y	Y	DM6
VA1d	Orco	Y	Y	Y	Y	Y	Y	Y	Y	Y	Y	Y	Y	VA1d
VA1v	Orco	Y	Y	Y	Y	Y	Y	Y	Y	Y	Y	Y	Y	VA1v
VA2	Orco	Y	Y	Y	Y	Y	Y	Y	Y	Y	Y	Y	Y	VA2
VA3	Orco	Y	Y	Y	Y	Y	Y	Y	Y	Y	Y	Y	Y	VA3
VA4	Orco	Y	Y	Y	Y	Y	Y	Y	Y	Y	Y	Y	Y	VA4
VA5	Orco	Y	Y	Y	Y	Y	Y	Y	Y	Y	Y	Y	Y	VA5
VA6	Orco	Y	Y	Y	Y	Y	Y	Y	Y	Y	Y	Y	Y	VA6
VA7l	Orco	Y	Y	Y	Y	Y	Y	Y	Y	Y	Y	Y	Y	VA7l
VA7m	Orco	Y	Y	Y	Y	Y	Y	Y	Y	Y	Y	Y	Y	VA7m
VC1	Orco	Y	Y	Y	Y	Y	Y	Y	Y	Y	Y	Y	Y	VC1
VC2	Orco	Y	Y	Y	Y	Y	Y	Y	Y	Y	Y	Y	Y	VC2
VC4	Orco	Y	Y	Y	Y	Y	Y	Y	Y	Y	Y	Y	Y	VC4
VM2	Orco	Y	Y	Y	Y	Y	Y	Y	Y	Y	Y	Y	Y	VM2
VM3	Orco	Y	Y	Y	Y	Y	Y	Y	Y	Y	Y	Y	Y	VM3
VM5d	Orco	Y	Y	Y	Y	Y	Y	Y	Y	Y	Y	Y	Y	VM5d
VM5v	Orco	Y	Y	Y	Y	Y	Y	Y	Y	Y	Y	Y	Y	VM5v
VM7d	Orco	Y	Y	Y	Y	Y	Y	Y	Y	Y	Y	Y	Y	VM7d
VM7v	Orco	Y	Y	Y	Y	Y	Y	Y	Y	Y	Y	Y	Y	VM7v
VM4	Ir8a, Ir25a, Ir76b	Strong	Strong	Strong	Strong	Strong	N	Strong	N	Strong	N	Strong	Strong	VM4
VL2a	Ir8a	Medium	Medium	Medium	Weak	Medium	Very Weak	Medium	Very Weak	Medium	N	Medium	Medium	VL2a
DL2d	Ir8a	Weak	N	Weak	Weak	Weak	N	N	N	Weak	N	N	Weak	DL2d
DL2v	Ir8a	Weak	N	Weak	Weak	Weak	N	N	N	Weak	N	N	Weak	DL2v
DP1l	Ir8a	Weak	Weak	Weak	Weak	Weak	N	Weak	N	Weak	N	N	Weak	DP1l
VL1	Ir25a	Weak	Weak	Weak	N	Very Weak	N	N	N	N	N	N	Weak	VL1
V	GRs	Weak	Weak	Weak	Weak	Weak	N	Very Weak	N	Very Weak	N	Very Weak	Weak	V
DC4	Ir8a	Weak	N	Weak	N	N	N	N	N	N	N	N	Variable	DC4

## Sheet: Ir8a KI
Glomerulus	Canonical Co-receptor(s)	Female Brain 1 singla AL	Female 2	Female 3	Female 4	5_5_21 Female 1	All Female	Male Brain 1	Male Brain 2 single AL	Male Brain 3	5_5_21 Male 1	5_5_21 Male 2	5_5_21 Male 3	5_5_21 Male 4	All Male	All Brains	Glomerulus
DC4	Ir8a	Y	Y	Y	Y	Y	Y	Y	Y	Y	Y	Y	Y	Y	Y	Y	DC4
DL2d	Ir8a	Y	Y	Y	Y	Y	Y	Y	Y	Y	Y	Y	Y	Y	Y	Y	DL2d
DL2v	Ir8a	Y	Y	Y	Y	Y	Y	Y	Y	Y	Y	Y	Y	Y	Y	Y	DL2v
DP1l	Ir8a	Y	Y	Y	Y	Y	Y	Y	Y	Y	Y	Y	Y	Y	Y	Y	DP1l
DP1m	Ir8a	Y	Y	Y	Y	Y	Y	Y	Y	Y	Y	Y	Y	Y	Y	Y	DP1m
VL2a	Ir8a	Y	Y	Y	Y	Y	Y	Y	Y	Y	Y	Y	Y	Y	Y	Y	VL2a
VL2p	Ir8a	Y	Y	Y	Y	Y	Y	Y	Y	Y	Y	Y	Y	Y	Y	Y	VL2p
VC5	Ir8a, Ir25a, Ir76b	Y	Y	Y	Y	Y	Y	Y	Y	Y	Y	Y	Y	Y	Y	Y	VC5
VM1	Ir8a, Ir25a, Ir76b	Y	Y	Y	Y	Y	Y	Y	Y	Y	Y	Y	Y	Y	Y	Y	VM1
VM4	Ir8a, Ir25a, Ir76b	Y	Y	Y	Y	Y	Y	Y	Y	Y	Y	Y	Y	Y	Y	Y	VM4
VL1	Ir25a	Y, strong	Y, strong	Y, strong	Y, strong	Y, strong	Y	Y, strong	Y, strong	Y, strong	Y, strong	Y, strong	Y, strong	Y, strong	Y	Y	VL1
VC3	Orco, Ir76b	Y, strong	Y, strong	Y, strong	Y, strong	Y, strong	Y	Y, strong	Y, strong	Y, strong	Y, strong	Y, strong	Y, strong	Y, strong	Y	Y	VC3
VM6l*	N/A	Y, strong	Y, strong	Y, strong	Y, strong	Y, strong	Y	Y, strong	Y, strong	Y, strong	Y, strong	Y, strong	Y, strong	Y, strong	Y	Y	VM6l*
VA6	Orco	Y, very weak	N	Maybe? Very Weak	N	Y, weak	Y	Y, very weak	Unclear	Maybe? Very Weak	Y, strong	Y, strong	Y, strong	Y, strong	Y	Y	VA6
VM6v*	Ir25a	Y, very weak	Maybe? Very Weak	N	N	Maybe? Very Weak	Y	Y, medium	Y, medium	Y, very weak	Y, strong	Y, weak	Y, very weak	Y, medium	Y	Y	VM6v*
VA3	Orco	Y, weak	Unclear	Y, very weak	Maybe? Very Weak	Y, medium	Y	Y, weak	Y, weak	Y, medium	Y, medium	Y, medium	Y, weak	Y, medium	Y	Y	VA3
VM6m*	N/A	Y, very weak	N	Maybe? Very Weak	N	Maybe? Very Weak	Y	Y, weak	Y, medium	Y, very weak	Y, strong	Y, weak	Y, weak	Y, medium	Y	Y	VM6m*
VA5	Orco	N	N	N	N	Y, medium	Variable	N	Maybe? Very Weak	N	Y, medium	Y, weak	Maybe? Very Weak	Y, weak	Y	Y	VA5
DL1	Orco	Y, weak	N	Y, weak	Unclear	N	Variable	N	Y, very weak	Y, weak	Y, weak	Y, very weak	N	Y, weak	Y	Y	DL1
VM5v	Orco	N	N	N	N	Maybe? Very Weak	Variable	Maybe? Very Weak	Y, very weak	Maybe? Very Weak	Y, very weak	Y, weak	Y, weak	Y, weak	Y	Y	VM5v
D	Orco	N	N	N	N	N	N	Unclear	N	N	Y, very weak	Y, very weak	Y, very weak	Maybe? Very Weak	Y	Variable	D
VM5d	Orco	N	N	N	N	N	N	Unclear	Unclear	Unclear	N	N	Unclear	Maybe? Very Weak	Variable	Variable	VM5d
*New
Co-label Experiments:
Glomerulus	Canonical Co-receptor(s)	Brain 1		Brain 2		Brain 3		All Brains		Glomerulus	Notes
		Ir8a-Gal4	Ir8a-QF2 KI	Ir8a-Gal4	Ir8a-QF2 KI	Ir8a-Gal4	Ir8a-QF2 KI	Ir8a-Gal4	Ir8a-QF2 KI		Imaging for co-labels not as high res as for above.
DC4	Ir8a	Y	Y	Y	Y	Y	Y	Y	Y	DC4
DL2d	Ir8a	Y	Y	Y	Y	Y	Y	Y	Y	DL2d
DL2v	Ir8a	Y	Y	Y	Y	Y	Y	Y	Y	DL2v
DP1l	Ir8a	Y	Y	Y	Y	Y	Y	Y	Y	DP1l
DP1m	Ir8a	Y	Y	Y	Y	Y	Y	Y	Y	DP1m
VL2a	Ir8a	Y	Y	Y	Y	Y	Y	Y	Y	VL2a
VL2p	Ir8a	Y	Y	Y	Y	Y	Y	Y	Y	VL2p
VC5	Ir8a, Ir25a, Ir76b	Y	Y	Y	Y	Y	Y	Y	Y	VC5
VM1	Ir8a, Ir25a, Ir76b	N	Y	Unclear	Y	Y	Y	Unclear	Y	VM1
VM4	Ir8a, Ir25a, Ir76b	N	Y	N	Y	Maybe? Very Weak	Y	N?	Y	VM4
VL1	Ir25a	Y, weak	Y, strong	Y, weak	Y, strong	Y, weak	Y, strong	Y	Y	VL1
VC3	Orco, Ir76b	Y, weak	Y, strong	Y, weak	Y, strong	Y, weak	Y, strong	Y	Y	VC3
VM6l*	N/A	Y, weak	Y, strong	Y, very weak	Y, strong	Y, very weak	Y, strong	Y	Y	VM6l*
VM6v*	N/A	N	Y, very weak	N	N	Maybe? Very weak	Y, weak	Unclear	Y	VM6v*
VM6m*	N/A	N	Y, very weak	Maybe? Very Weak	Y, weak	Maybe? Very weak	Y, weak	Unclear	Y	VM6m*
VA6	Orco	N	N	N	N	N	Maybe? Very Weak	N	Variable	VA6
VA5	Orco	N	Maybe? Very Weak	N	N	N	N	N	Variable	VA5
DL1	Orco	N	Maybe? Very Weak	N	Y, weak	N	N	N	Variable	DL1
VM5v	Orco	N	N	N	N	N	Maybe? Very Weak	N	Variable	VM5v
VA3	Orco	N	Maybe? Very Weak	N	Maybe? Very Weak	N	Unclear	N	Variable	VA3
D	Orco	N	N	N	N	N	N	N	N	D
VM5d	Orco	N	N	N	N	N	N	N	N	VM5d
*New

## Sheet: Ir76b KI
Glomerulus	Canonical Co-receptor(s)	Female Brain 1	Female Brain 2	Female Brain 3	Female Brain 4	Female Brain 5	Male Brain 1	Male Brain 2	All Brains	Summary	Glomerulus
VC3	Orco, Ir76b	Y	Y	Y	Y	Y	Y	Y	Y, 100% of brains	Y	VC3
VC5	Ir8a, Ir25a, Ir76b	Y	Y	Y	Y	Y	Y	Y	Y, 100% of brains	Y	VC5
VM1	Ir8a, Ir25a, Ir76b	Y	Y	Y	Y	Y	Y	Y	Y, 100% of brains	Y	VM1
VM4	Ir8a, Ir25a, Ir76b	Y	Y	Y	Y	Y	Y	Y	Y, 100% of brains	Y	VM4
VL1	Ir25a	Y	Y	Y	Y	Y	Y	Y	Y, 100% of brains	Y	VL1
VL2a	Ir8a	Y	Y	Y	Y	Y	Y	Y	Y, 100% of brains	Y	VL2a
DP1l	Ir8a	Y	Y	Y	Y	Y	Y	Y	Y, 100% of brains	Y	DP1l
DP1m	Ir8a	Y	Y	Y	Y	Y	Y	Y	Y, 100% of brains	Y	DP1m
VL2p	Ir8a	Y	Y	Y	Y	Y	Y	Y	Y, 100% of brains	Y	VL2p
DC3	Orco	Y	Y	Y	Y	Y	Y	Y	Y, 100% of brains	Y	DC3
VC4	Orco	Y	Y	Y	Y	Y	Y	Y	Y, 100% of brains	Y	VC4
VA6	Orco	Y	Y	Y	Y	Y	N	Weak	Y, 71% of brains	Y, Weak	VA6
DL1	Orco	Y	Weak	Y	Y	Y	Weak	Weak	Y, 57% of brains; Weak 43% of brains	Weak	DL1
VA5	Orco	Weak	Weak	Weak	Weak	Weak	Weak	Weak	Weak, 100% of brains	Weak	VA5
VA3	Orco	Weak	Weak	Unclear	Weak	Weak	Weak	Weak	Weak, 86% of brains	Weak	VA3
VA7m	Orco	Weak	Weak	Unclear	Unclear	Unclear	N	Unclear	Unclear, 57% of brains	Variable	VA7m
DA1	Orco	Maybe? Very weak	Maybe? Very weak	N	N	N	N	N	N, 71% of brains	Variable	DA1
Notes:
Male Orco+ glomeruli more weakly labeled overall.
Male Brain 3 distorted during dissections, not used for analysis.
Co-label Experiments:
Glomerulus	Canonical Co-receptor(s)	Brain 1		Brain 2		Brain 3		Brain 4		All Brains		Summary	Notes
		Ir76b-Gal4	Ir76b-QF2 KI	Ir76b-Gal4	Ir76b-QF2 KI	Ir76b-Gal4	Ir76b-QF2 KI	Ir76b-Gal4	Ir76b-QF2 KI	Ir76b-Gal4	Ir76b-QF2 KI
VC3	Orco, Ir76b	Y	Y	Y	Y	Y	Y	Y	Y	Y	Y	VC3
VC5	Ir8a, Ir25a, Ir76b	Y	Y	Y	Y	Y	Y	Y	Y	Y	Y	VC5
VM1	Ir8a, Ir25a, Ir76b	Y	Y	Y	Y	Y	Y	Y	Y	Y	Y	VM1
VM4	Ir8a, Ir25a, Ir76b	Y	Y	Y	Y	Y	Y	Y	Y	Y	Y	VM4
VL1	Ir25a	Y	Y	Y	Y	Y	Y	Y	Y	Y	Y	VL1	Strongly and consistently labeled by both Gal4 and KI.
VL2a	Ir8a	Y	Y	Y	Y	Y	Y	Y	Y	Y	Y	VL2a	Strongly and consistently labeled by both Gal4 and KI.
DP1l	Ir8a	Y	Y	Y	Y	Y	Y	Y	Y	Y	Y	DP1l	Strongly and consistently labeled by both Gal4 and KI.
DP1m	Ir8a	Weak	Y	Unclear	Y	Weak	Weak	Y	Y	Y/Weak	Y	DP1m	More weakly but consistently labeled by both Gal4 and KI.
VL2p	Ir8a	Y	Y	Y	Y	Y	Y	Y	Y	Y	Y	VL2p	More weakly but consistently labeled by both Gal4 and KI.
DC3	Orco	Weak	Y	Unclear	Y	Weak	Y	Y	Y	Y/Weak	Y	DC3
VC4	Orco	Unclear	Y	N	Y	Unclear	Y	Weak	Y	Unclear	Y	VC4
VA6	Orco	Unclear	Unclear	Unclear	Weak	Unclear	Unclear	Y	Weak	Unclear	Weak/Unclear	VA6
DL1	Orco	Unclear	Weak	Unclear	Weak	Unclear	Weak	Unclear	Weak	Unclear	Weak	DL1
VA5	Orco	N	Y	N	Unclear	Unclear	Unclear	N	Weak	N	Weak/Unclear	VA5
VA3	Orco	Weak	Y	Weak	Y	Unclear	Y	Y	Y	Y/Weak	Y	VA3
VA7m	Orco	Weak	Y	Unclear	Weak	N	Y	Y	Y	Unclear	Y	VA7m
DA1	Orco	N	Unclear	N	N	N	N	N	N	N	N	DA1
Notes:
Expression pattern/levels of all brains look like males.

## Sheet: Ir25a KI
Glomerulus	Canonical Co-receptor(s)	Female 1	Female 2	Female 3	18 DPE Female 1	18 DPE Female 2	18 DPE Female 3	Male 1	Male 2	Male 3	3 DPE Male 1	3 DPE Male 2	3 DPE Male 3	18 DPE Male 1	18 DPE Male 2	18 DPE Male 3	Female Summary	Male Summary	Overall Summary	Glomerulus
VP2	Ir25a	Yes	Yes	Yes	Yes	Yes	Yes	Yes	Yes	Yes	Yes	Yes	Yes	Yes	Yes	Yes	Yes	Yes	Yes	VP2
VP3	Ir25a	Yes	Yes	Yes	Yes	Yes	Yes	Yes	Yes	Yes	Yes	Yes	Yes	Yes	Yes	Yes	Yes	Yes	Yes	VP3
VP4	Ir25a	Yes	Yes	Yes	Yes	Yes	Yes	Yes	Yes	Yes	Yes	Yes	Yes	Yes	Yes	Yes	Yes	Yes	Yes	VP4
VP1d	Ir25a	Yes	Yes	Yes	Yes	Yes	Yes	Yes	Yes	Yes	Yes	Yes	Yes	Yes	Yes	Yes	Yes	Yes	Yes	VP1d
VP1l	Ir25a	Yes	Yes	Yes	Yes	Yes	Yes	Yes	Yes	Yes	Yes	Yes	Yes	Yes	Yes	Yes	Yes	Yes	Yes	VP1l
VP1m	Ir25a	Yes	Yes	Yes	Yes	Yes	Yes	Yes	Yes	Yes	Yes	Yes	Yes	Yes	Yes	Yes	Yes	Yes	Yes	VP1m
VP5	Ir25a	Yes	Yes	Yes	Yes	Yes	Yes	Yes	Yes	Yes	Yes	Yes	Yes	Yes	Yes	Yes	Yes	Yes	Yes	VP5
VL1	Ir25a	Yes	Yes	Yes	Yes	Yes	Yes	Yes	Yes	Yes	Yes	Yes	Yes	Yes	Yes	Yes	Yes	Yes	Yes	VL1
VM6v*	Ir25a	Yes	Yes	Yes	Yes	Yes	Yes	Yes	Yes	Yes	Yes	Yes	Yes	Yes	Yes	Yes	Yes	Yes	Yes	VM6v*
VC5	Ir8a, Ir25a, Ir76b	Yes	Yes	Yes	Yes	Yes	Yes	Yes	Yes	Yes	Yes	Yes	Yes	Yes	Yes	Yes	Yes	Yes	Yes	VC5
VM1	Ir8a, Ir25a, Ir76b	Yes	Yes	Yes	Yes	Yes	Yes	Yes	Yes	Yes	Yes	Yes	Yes	Yes	Yes	Yes	Yes	Yes	Yes	VM1
VM4	Ir8a, Ir25a, Ir76b	Yes	Yes	Yes	Yes	Yes	Yes	Yes	Yes	Yes	Yes	Yes	Yes	Yes	Yes	Yes	Yes	Yes	Yes	VM4
VM6l*	N/A	Yes	Yes	Yes	Yes	Yes	Yes	Yes	Yes	Yes	Yes	Yes	Yes	Yes	Yes	Yes	Strong	Strong	Strong	VM6l*
VM6m*	N/A	Yes	Yes	Yes	Yes	Yes	Yes	Yes	Yes	Yes	Yes	Yes	Yes	Yes	Yes	Yes	Strong	Strong	Strong	VM6m*
VC3	Orco, Ir76b	Strong	Strong	Strong	Strong	Strong	Strong	Strong	Strong	Strong	Strong	Strong	Strong	Strong	Strong	Strong	Strong	Strong	Strong	VC3
VL2a	Ir8a	Strong	Strong	Strong	Strong	Strong	Strong	Strong	Strong	Strong	Strong	Strong	Strong	Strong	Strong	Strong	Strong	Strong	Strong	VL2a
DL2d	Ir8a	Strong	Strong	Strong	Strong	Strong	Strong	Strong	Strong	Strong	Strong	Strong	Strong	Strong	Strong	Strong	Strong	Strong	Strong	DL2d
DL2v	Ir8a	Strong	Strong	Strong	Strong	Strong	Strong	Strong	Strong	Strong	Strong	Strong	Strong	Strong	Strong	Strong	Strong	Strong	Strong	DL2v
DP1l	Ir8a	Strong	Strong	Strong	Strong	Strong	Strong	Strong	Strong	Strong	Strong	Strong	Strong	Strong	Strong	Strong	Strong	Strong	Strong	DP1l
VL2p	Ir8a	Strong	Strong	Strong	Strong	Strong	Strong	Strong	Strong	Strong	Strong	Strong	Strong	Strong	Strong	Strong	Strong	Strong	Strong	VL2p
DP1m	Ir8a	Strong	Strong	Strong	Strong	Strong	Strong	Strong	Strong	Strong	Strong	Strong	Strong	Strong	Strong	Strong	Strong	Strong	Strong	DP1m
V	GRs	Strong	Strong	Strong	Weak	Weak	Strong	Strong	Strong	Strong	Strong	Strong	Strong	Weak	Weak	Medium	Strong	Strong	Strong	V
DA2	Orco	Strong	Strong	Strong	Strong	Strong	Strong	Strong	Strong	Strong	Strong	Strong	Strong	Strong	Strong	Strong	Strong	Strong	Strong	DA2
DA4m	Orco	Strong	Strong	Strong	Strong	Strong	Strong	Strong	Strong	Strong	Strong	Strong	Strong	Strong	Strong	Strong	Strong	Strong	Strong	DA4m
VM5d	Orco	Strong	Strong	Strong	Strong	Strong	Strong	Strong	Strong	Strong	Strong	Strong	Strong	Strong	Strong	Strong	Strong	Strong	Strong	VM5d
DA3	Orco	Strong	Strong	Strong	Strong	Strong	Strong	Strong	Strong	Strong	Strong	Strong	Strong	Strong	Strong	Strong	Strong	Strong	Strong	DA3
DA4l	Orco	Strong	Strong	Strong	Strong	Strong	Strong	Strong	Medium	Strong	Strong	Strong	Medium	Strong	Strong	Strong	Strong	Strong	Strong	DA4l
DL1	Orco	Strong	Strong	Strong	Strong	Strong	Strong	Strong	Strong	Strong	Strong	Strong	Strong	Strong	Strong	Strong	Strong	Strong	Strong	DL1
DL4	Orco	Strong	Medium	Strong	Strong	Strong	Strong	Medium	Medium	Medium	Medium	Medium	Medium	Strong	Strong	Strong	Strong	Medium	Strong	DL4
VA3	Orco	Strong	Strong	Strong	Strong	Strong	Strong	Strong	Strong	Strong	Medium	Strong	Strong	Strong	Strong	Strong	Strong	Strong	Strong	VA3
VA5	Orco	Strong	Strong	Strong	Strong	Strong	Strong	Strong	Strong	Strong	Medium	Strong	Strong	Strong	Strong	Strong	Strong	Strong	Strong	VA5
VA7l	Orco	Strong	Strong	Strong	Strong	Strong	Strong	Strong	Strong	Strong	Medium	Strong	Strong	Strong	Strong	Strong	Strong	Strong	Strong	VA7l
VC1	Orco	Strong	Strong	Strong	Strong	Strong	Strong	Strong	Strong	Strong	Medium	Strong	Strong	Strong	Strong	Strong	Strong	Strong	Strong	VC1
VC2	Orco	Strong	Strong	Strong	Strong	Strong	Strong	Strong	Strong	Strong	Medium	Strong	Strong	Strong	Strong	Strong	Strong	Strong	Strong	VC2
VC4	Orco	Strong	Strong	Strong	Strong	Strong	Strong	Strong	Strong	Strong	Medium	Strong	Strong	Strong	Strong	Strong	Strong	Strong	Strong	VC4
VA2	Orco	Strong	Strong	Strong	Strong	Medium	Strong	Strong	Strong	Strong	Medium	Strong	Strong	Medium	Medium	Medium	Strong	Strong	Strong	VA2
VM5v	Orco	Strong	Strong	Strong	Strong	Medium	Strong	Strong	Medium	Strong	Medium	Strong	Strong	Medium	Medium	Medium	Strong	Medium	Strong	VM5v
VM7d	Orco	Strong	Strong	Strong	Strong	Strong	Strong	Strong	Strong	Strong	Strong	Strong	Strong	Strong	Strong	Strong	Strong	Strong	Strong	VM7d
VM7v	Orco	Medium	Medium	Strong	Strong	Strong	Strong	Medium	Medium	Medium	Medium	Medium	Medium	Medium	Medium	Medium	Strong	Medium	Medium	VM7v
DC1	Orco	Medium	Medium	Strong	Strong	Strong	Strong	Medium	Medium	Medium	Medium	Medium	Medium	Strong	Strong	Strong	Strong	Medium	Medium	DC1
DL3	Orco	Medium	Weak	Strong	Medium	Medium	Strong	Weak	Weak	Weak	Weak	Weak	Weak	Medium	Medium	Weak	Medium	Weak	Weak	DL3
DM1	Orco	Medium	Medium	Strong	Medium	Medium	Strong	Medium	Medium	Weak	Weak	Medium	Weak	Medium	Weak	Weak	Medium	Weak	Medium	DM1
DM2	Orco	Medium	Medium	Strong	Strong	Strong	Strong	Medium	Medium	Weak	Weak	Medium	Weak	Medium	Medium	Medium	Strong	Medium	Medium	DM2
DM4	Orco	Medium	Medium	Strong	Weak	Weak	Strong	Medium	Weak	Very Weak	Weak	Weak	Weak	Medium	Weak	Weak	Weak to Strong (varies)	Weak	Weak	DM4
VA1d	Orco	Medium	Medium	Strong	Strong	Medium	Strong	Medium	Medium	Medium	Medium	Weak	Medium	Medium	Strong	Medium	Medium to Strong (varies)	Medium	Medium	VA1d
VA4	Orco	Medium	Medium	Strong	Strong	Strong	Medium	Medium	Medium	Medium	Medium	Medium	Medium	Medium	Medium	Medium	Medium to Strong (varies)	Medium	Medium	VA4
VA7m	Orco	Medium	Weak	Medium	Weak	Weak	Strong	Weak	Very Weak	Weak	Very Weak	Weak	Weak	Medium	Medium	Weak	Weak	Weak	Weak	VA7m
DA1	Orco	Weak	Weak	Medium	Weak	Weak	Medium	Weak	Very Weak	Weak	Weak	Weak	Weak	Weak	Weak	Weak	Weak	Weak	Weak	DA1
DC2	Orco	Weak	Weak	Weak	Medium	Weak	Medium	Weak	Weak	Very Weak	Medium	Weak	Medium	Medium	Medium	Medium	Weak	Medium	Weak	DC2
DM6	Orco	Weak	Weak	Medium	Medium	Weak	Strong	Weak	Weak	Weak	Weak	Weak	Weak	Medium	Medium	Medium	Weak	Weak	Weak	DM6
VA6	Orco	Weak	Very Weak	Medium	Very Weak?	Very Weak?	Weak	Weak	Weak	Very Weak?	Very Weak?	Very Weak	Weak	Medium	Weak	Weak	Weak	Weak	Weak	VA6
DC4	Ir8a	Weak?	Weak	Very Weak?	Weak	Very Weak?	Medium	Weak	Very Weak?	Weak	Weak	Weak	Weak	Very Weak?	Weak	Weak	Weak	Weak	Weak	DC4
DC3	Orco	Very Weak?	Unclear	Very Weak?	No	No	No	No	Very Weak	No?	Very Weak?	Very Weak?	Weak	No	No	No?	Variable	Variable	Variable	DC3
VA1v	Orco	Very Weak?	Very Weak?	Very Weak?	Weak	Very Weak?	Weak	Very Weak?	No?	Very Weak	Very Weak?	Very Weak?	Very Weak?	Weak	Weak	Weak	Weak	Weak	Weak	VA1v
D	Orco	No	No	No	No	No	No	No	No	No	No	No	No	No	No	No	No	No	No	D
DL5	Orco	No	No	No	No	Very Weak?	Weak?	No	No	No	Weak	No	Very Weak?	Unclear	Unclear	Very Weak?	Variable	Variable	Variable	DL5
DM3	Orco	No	No	No	No	No	Unclear	No	No	No	No	No	No	Unclear	Unclear	No	No	No	No	DM3
DM5	Orco	No	No	No	No	No	No	No	No	No	No	No	No	No	No	No	No	No	No	DM5
VM2	Orco	No	No	No	No	No	No	No	No	No	No	No	No	No	No	No	No	No	No	VM2
VM3	Orco	No	No	No	No	No	No	No	No	No	No	No	No	No	No	No	No	No	No	VM3
*New
