# Supplementary material for: Chemoreceptor co-expression in Drosophila melanogaster olfactory neurons
Source: eLife. 2022 Apr 20;11:e72599. doi: 10.7554/eLife.72599 (PMC9020824; doi:10.7554/eLife.72599)
Supplement: Figure 4—source data 1. [file elife-72599-fig4-data1.xlsx]

## Sheet: snRNAseq
Cluster ID	Decoded OSN	Canonical Co-Receptor	Total Cells	Orco+ Cells	Fraction	Max	Norm	Total Cells	Ir8a+ Cells	Fraction	Max	Norm	Total Cells	Ir76b+ Cells	Fraction	Max	Norm	Total Cells	Ir25a+ Cells	Fraction	Max	Norm	Norm = Fraction/Max
1	V	N/A	79	24	0.303797	1	0.303797	79	0	0	0.434783	0	79	1	0.0126582	0.741935	0.0170611	79	23	0.291139	0.580645	0.501406
2	DM4	Orco	86	83	0.965116	1	0.965116	86	0	0	0.434783	0	86	0	0	0.741935	0	86	18	0.209302	0.580645	0.360465
3	DM2	Orco	78	77	0.987179	1	0.987179	78	0	0	0.434783	0	78	1	0.0128205	0.741935	0.0172798	78	21	0.269231	0.580645	0.463675
4	DC2	Orco	51	50	0.980392	1	0.980392	51	0	0	0.434783	0	51	1	0.0196078	0.741935	0.026428	51	12	0.235294	0.580645	0.405229
5	VA1v	Orco	90	85	0.944444	1	0.944444	90	0	0	0.434783	0	90	6	0.0666667	0.741935	0.0898551	90	4	0.0444444	0.580645	0.0765432
6	DA1	Orco	119	100	0.840336	1	0.840336	119	0	0	0.434783	0	119	6	0.0504202	0.741935	0.0679576	119	2	0.0168067	0.580645	0.0289449
7	VP1l/VP3	Ir25a	26	4	0.153846	1	0.153846	26	0	0	0.434783	0	26	1	0.0384615	0.741935	0.0518395	26	12	0.461538	0.580645	0.794872
8	DC1	Orco	118	112	0.949153	1	0.949153	118	0	0	0.434783	0	118	5	0.0423729	0.741935	0.0571113	118	52	0.440678	0.580645	0.758945
10	D	Orco	36	35	0.972222	1	0.972222	36	0	0	0.434783	0	36	1	0.0277778	0.741935	0.0374396	36	0	0	0.580645	0
11	VM3*	Orco	53	51	0.962264	1	0.962264	53	0	0	0.434783	0	53	5	0.0943396	0.741935	0.127153	53	4	0.0754717	0.580645	0.129979
12	DP1l*	Ir8a	101	22	0.217822	1	0.217822	101	42	0.415842	0.434783	0.956436	101	21	0.207921	0.741935	0.280241	101	38	0.376238	0.580645	0.647965
13	DP1m/DC4	Ir8a	69	14	0.202899	1	0.202899	69	30	0.434783	0.434783	1	69	3	0.0434783	0.741935	0.0586011	69	16	0.231884	0.580645	0.399356
14	DM1	Orco	169	164	0.970414	1	0.970414	169	0	0	0.434783	0	169	5	0.0295858	0.741935	0.0398765	169	34	0.201183	0.580645	0.346483
15	VA2	Orco	51	51	1	1	1	51	0	0	0.434783	0	51	1	0.0196078	0.741935	0.026428	51	15	0.294118	0.580645	0.506536
16	DL3	Orco	14	14	1	1	1	14	0	0	0.434783	0	14	2	0.142857	0.741935	0.192547	14	6	0.428571	0.580645	0.738095
17	VA1d	Orco	14	14	1	1	1	14	0	0	0.434783	0	14	0	0	0.741935	0	14	4	0.285714	0.580645	0.492063
18	VP4/VP1d/VP2	Ir25a	28	6	0.214286	1	0.214286	28	1	0.0357143	0.434783	0.0821429	28	1	0.0357143	0.741935	0.0481366	28	16	0.571429	0.580645	0.984127
19	VL1*	Ir25a	31	6	0.193548	1	0.193548	31	11	0.354839	0.434783	0.816129	31	23	0.741935	0.741935	1	31	18	0.580645	0.580645	1
23	DM3*	Orco	104	99	0.951923	1	0.951923	104	0	0	0.434783	0	104	18	0.173077	0.741935	0.233278	104	7	0.0673077	0.580645	0.115919
26	DL5	Orco	48	48	1	1	1	48	0	0	0.434783	0	48	3	0.0625	0.741935	0.0842391	48	4	0.0833333	0.580645	0.143519
				max:	1				max:	0.434783				max:	0.741935				max:	0.580645
	Asterisk means that at the adult stage the cluster contained multiple OSN types, but it was annotated with the name of the developmental cluster it mapped to (24h or 42h APF).
	VM3* = VM3/VA5
	DP1l* = DP1l/DL2d/DL2v/VC3
	VL1* = VL1/VM1
	DM3* = DM3/VA6/DC3
