# Supplementary material for: Chemoreceptor co-expression in Drosophila melanogaster olfactory neurons
Source: eLife. 2022 Apr 20;11:e72599. doi: 10.7554/eLife.72599 (PMC9020824; doi:10.7554/eLife.72599)
Supplement: Figure 4—source data 2. [file elife-72599-fig4-data2.xlsx]

## Sheet: Indiv Glom Analysis Summary
Glomerulus	Sensillum	Tuning Receptor(s)	Co-label experiment w/ Ir25a KI	Optogenetics	snRNAseq*	Covered by at least one type of analysis?	Key:
D	Ab9A	Or69aA, Or69aB	N	Y	Y	Y	Y = Yes
DA1	At1A	Or67d	N	N	Y	Y	N = No
DA2	Ab4B	Or56a, Or33a	N	N	N	N
DA3	Ai2B (At2B)	Or23a	N	N	N	N
DA4l	Ai3C (At3C)	Or43a	N	N	N	N
DA4m	Ai3B (At3B)	Or2a	N	N	N	N
DC1	Ai3A (At3A)	Or19a, Or19b	N	N	Y	Y
DC2	Ai1A (Ab6A)	Or13a	Y	N	Y	Y
DC3	Ai2A (At2A)	Or83c	Y	N	?	Y
DC4	Sacculus, Chamber III	Ir64a	Y	N	Y	Y
DL1	Ab1D	Or10a, Gr10a	Y	N	N	Y
DL2d	Ac3A	Ir75b	N	N	?	N?
DL2v	Ac3A	Ir75c	N	N	?	N?
DL3	At4B	Or65a, Or65b, Or65c	N	N	Y	Y
DL4	Ab10B	Or49a, Or85f	N	N	N	N
DL5	Ab4A	Or7a	Y	N	Y	Y
DM1	Ab1A	Or42b	Y	N	Y	Y
DM2	Ab3A	Or22a, Or22b	Y	Y	Y	Y
DM3	Ab5B	Or47a, Or33b	Y	N	Y	Y
DM4	Ab2A	Or59b	N	Y	Y	Y
DM5	Ab2B	Or85a, Or33b	Y	Y	N	Y
DM6	Ab10A	Or67a	Y	N	N	Y
DP1l	Ac2	Ir75a	N	N	Y	Y
DP1m	Sacculus, Chamber III	Ir64a	Y	N	Y	Y
V	Ab1C	Gr21a, Gr63a	Y	N	Y	Y
VA1d	At4C	Or88a	N	N	Y	Y
VA1v	At4A	Or47b	N	N	Y	Y
VA2	Ab1B	Or92a	Y	N	Y	Y
VA3	Ab9B	Or67b	Y	Y	N	Y
VA4	Pb3B	Or85d	Y	N	N	Y
VA5	Ai1B (Ab6B)	Or49b	Y	N	?	Y
VA6	Ab5A	Or82a	N	N	?	N?
VA7l	Pb2B	Or46a	Y	N	N	Y
VA7m	UNK	UNK	N	N	N	N
VC1	Pb2A	Or33c, Or85e	N	N	N	N
VC2	Pb1B	Or71a	Y	N	N	Y
VC3	Ac3B	Or35a	N	N	?	N?
VC4	Ab7B	Or67c	Y	N	N	Y
VC5	Ac2	Ir41a	Y	N	N	Y
VL1	Ac1, Ac2, Ac4	Ir75d	N	N	Y	Y
VL2a	Ac4	Ir84a	N	N	N	N
VL2p	Ac1	Ir31a	N	N	N	N
VM1	Ac1	Ir92a	N	N	?	N?
VM2	Ab8A	Or43b	N	N	N	N
VM3	Ab8B	Or9a	N	N	Y	Y
VM4	Ac4	Ir76a	N	N	N	N
VM5d	Ab3B	Or85b?, Or98b?	N	Y	N	Y
VM5v	Ab7A	Or98a	Y	N	N	Y
VM6l (new)	Sacculus, Chamber III	Rh50, Amt	N	N	N	N
VM6m (new)	Sacculus, Chamber III	Rh50, Amt	N	N	N	N
VM6v (VM6)	Ac1	Rh50, Amt	N	N	N	N
VM7d	Pb1A	Or42a	Y	N	N	Y
VM7v (1)	Pb3A	Or59c	Y	N	N	Y
VP1d	Sacculus, Chamber II	Ir40a, Ir93a	N	N	Y	Y
VP1l	Sacculus, Chamber I	Ir21a, Ir93a	N	N	Y	Y
VP1m	Sacculus, Chamber I	Ir68a, Ir93a	N	N	N	N
VP2	Arista	Gr28b.d, Ir93a	N	N	Y	Y
VP3	Arista	Ir21a, Ir93a	N	N	Y	Y
VP4	Sacculus, Chambers I + II	Ir40a, Ir93a	N	N	Y	Y
VP5	Sacculus, Chamber II	Ir68a, Ir93a	N	N	N	N
		Total 'Y':	23	6	24	39
		Proportion of all glomeruli:	0.396552	0.103448	0.413793	0.672414
Notes:
? = at the adult stage some clusters contained multiple OSN types, but were annotated with the name of the developmental cluster they mapped to. ? denotes additional (unmapped) OSN types.
*Separates clustered glomeruli
