# Supplementary material for: Chemoreceptor co-expression in Drosophila melanogaster olfactory neurons
Source: eLife. 2022 Apr 20;11:e72599. doi: 10.7554/eLife.72599 (PMC9020824; doi:10.7554/eLife.72599)
Supplement: Figure 4—source data 3. [file elife-72599-fig4-data3.xlsx]

## Sheet: Optogenetics
genotype	file name	sensilla	25_A	25_B	25_A	25_B	50_A	50_B	50_A	50_B	75_A	75_B	75_A	75_B	100_A	100_B	100_A	100_B	150_A	150_B	150_A	150_B
QUAS_Chrimson_11C (ATR for 4 days)	ab2_QUASChrimson_female1_2(MO, EA, PA, 25, 50, 75, 100, 150)	ab2	1	0	0	1	-2	1	-3	-1	3	0	-1	0	-3	0	0	5	2	1	3	0
QUAS_Chrimson_11C (ATR for 4 days)	ab2_QUASChrimson_female1_4(MO, EA, PA, 25, 50, 75, 100, 150)	ab2	-1	0	-3	3	0	1	0	0	1	2	-3	0	-1	0	3	-2	-1	0	1	0
QUAS_Chrimson_11C (ATR for 4 days)	ab2_QUASChrimson_female1_5(MO, EA, PA, 25, 50, 75, 100, 150)	ab2	3	0	-2	-1	0	0	2	1	4	1	-3	0	0	0	2	1	-1	-1	-1	1
QUAS_Chrimson_11C (ATR for 4 days)	ab2_QUASChrimson_female2_4(MO, EA, PA, 25, 50, 75, 100, 150)	ab2	2	0	-3	4	0	-1	1	-2	-1	-2	1	0	0	0	4	0	-3	0	-2	2
QUAS_Chrimson_11C (ATR for 4 days)	ab2_QUASChrimson_male1_1(MO, EA, PA, 25, 50, 75, 100, 150)	ab2	2	-2	-1	-1	1	0	2	-2	-2	0	1	-1	-1	-1	3	0	3	0	-3	1
QUAS_Chrimson_11C (ATR for 4 days)	ab2_QUASChrimson_male1_2(MO, EA, PA, 25, 50, 75, 100, 150)	ab2	2	-1	-1	-1	-5	1	5	0	3	0	1	0	0	1	0	0	2	0	-3	0
QUAS_Chrimson_11C (ATR for 4 days)	ab2_QUASChrimson_male1_3(MO, EA, PA, 25, 50, 75, 100, 150)	ab2	-2	0	-2	2	1	0	2	-1	-2	0	0	0	1	0	3	0	1	0	2	0
			0.5	0.5			-2.5	0			1	0			-1.5	2.5			2.5	0.5
			-2	1.5			0	0.5			-1	1			1	-1			0	0
			0.5	-0.5			1	0.5			0.5	0.5			1	0.5			-1	0
			-0.5	2			0.5	-1.5			0	-1			2	0			-2.5	1
			0.5	-1.5			1.5	-1			-0.5	-0.5			1	-0.5			0	0.5
			0.5	-1			0	0.5			2	0			0	0.5			-0.5	0
			-2	1			1.5	-0.5			-1	0			2	0			1.5	0
		mean	-0.357143	0.285714			0.285714	-0.214286			0.142857	0			0.785714	0.285714			0	0.285714
		SD	1.09265	1.22057			1.27775	0.749149			1.02519	0.597614			1.12938	1.03016			1.51186	0.364216
		SE	0.41232	0.460593			0.482171	0.282698			0.386865	0.225515			0.426183	0.388739			0.570512	0.13744
genotype	file name	sensilla	25_A	25_B	25_A	25_B	50_A	50_B	50_A	50_B	75_A	75_B	75_A	75_B	100_A	100_B	100_A	100_B	150_A	150_B	150_A	150_B
QUAS_Chrimson_11C (ATR for 4 days)	ab3_QUASChrimson_female1_1(MO, EA, PA, 25, 50, 75, 100, 150)	ab3	-2	1	3	-1	1	0	0	0	-1	0	0	0	2	1	0	-1	2	2	-2	1
QUAS_Chrimson_11C (ATR for 4 days)	ab3_QUASChrimson_female1_2(MO, EA, PA, 25, 50, 75, 100, 150)	ab3	-1	1	-3	2	1	2	2	0	-3	0	3	0	-2	0	0	0	-1	0	2	0
QUAS_Chrimson_11C (ATR for 4 days)	ab3_QUASChrimson_female2_1(MO, EA, PA, 25, 50, 75, 100, 150)	ab3	2	2	0	0	-2	0	1	2	0	0	-2	1	0	0	-1	0	2	-2	0	-1
QUAS_Chrimson_11C (ATR for 4 days)	ab3_QUASChrimson_female2_2(MO, EA, PA, 25, 50, 75, 100, 150)	ab3	0	0	0	0	2	1	-2	0	3	0	-1	0	0	0	1	0	0	0	1	1
QUAS_Chrimson_11C (ATR for 4 days)	ab3_QUASChrimson_female2_3(MO, EA, PA, 25, 50, 75, 100, 150)	ab3	-1	0	0	1	0	2	1	0	1	0	0	0	1	-2	-2	2	2	1	0	0
QUAS_Chrimson_11C (ATR for 4 days)	ab3_QUASChrimson_male1_4(MO, EA, PA, 25, 50, 75, 100, 150)	ab3	0	1	1	-1	-1	1	2	0	0	0	1	0	1	0	0	0	3	0	-2	-2
QUAS_Chrimson_11C (ATR for 4 days)	ab3_QUASChrimson_male1_5(MO, EA, PA, 25, 50, 75, 100, 150)	ab3	0	1	0	-2	-1	-1	0	1	0	0	3	-1	-2	0	1	-2	1	0	0	0
			0.5	0			0.5	0			-0.5	0			1	0			0	1.5
			-2	1.5			1.5	1			0	0			-1	0			0.5	0
			1	1			-0.5	1			-1	0.5			-0.5	0			1	-1.5
			0	0			0	0.5			1	0			0.5	0			0.5	0.5
			-0.5	0.5			0.5	1			0.5	0			-0.5	0			1	0.5
			0.5	0			0.5	0.5			0.5	0			0.5	0			0.5	-1
			0	-0.5			-0.5	0			1.5	-0.5			-0.5	-1			0.5	0
		mean	-0.0714286	0.357143			0.285714	0.571429			0.285714	0			-0.0714286	-0.142857			0.571429	0
		SD	0.903508	0.638877			0.646813	0.416497			0.795395	0.267261			0.677631	0.349927			0.319438	0.92582
		SE	0.340946	0.241085			0.24408	0.157169			0.300149	0.100853			0.25571	0.132048			0.120543	0.349366
genotype	file name	sensilla	25_A	25_B	25_A	25_B	50_A	50_B	50_A	50_B	75_A	75_B	75_A	75_B	100_A	100_B	100_A	100_B	150_A	150_B	150_A	150_B
Ir25a-QF2KI/QUAS-CsChrimson(11C)	ab2_Ir25aQF2KI_QUASChrimson_female1_7	ab2	3	0	0	0	6	0	3	0	9	0	6	0	10	0	12	0	10	-2	14	0
Ir25a-QF2KI/QUAS-CsChrimson(11C)	ab2_Ir25aQF2KI_QUASChrimson_female1_8	ab2	3	-2	5	2	5	0	3	0	8	0	7	0	9	0	12	0	11	1	13	0
Ir25a-QF2KI/QUAS-CsChrimson(11C)	ab2_Ir25aQF2KI_QUASChrimson_female2_1	ab2	0	0	3	2	2	-1	3	-1	5	-2	3	0	7	1	9	5	9	2	7	0
Ir25a-QF2KI/QUAS-CsChrimson(11C)	ab2_Ir25aQF2KI_QUASChrimson_female2_3	ab2	1	0	1	0	4	0	2	0	8	4	8	0	8	0	10	0	11	0	12	0
Ir25a-QF2KI/QUAS-CsChrimson(11C)	ab2_Ir25aQF2KI_QUASChrimson_female2_6	ab2	3	0	3	0	2	0	4	0	5	1	5	-2	7	0	2	0	7	1	10	2
Ir25a-QF2KI/QUAS-CsChrimson(11C)	ab2_Ir25aQF2KI_QUASChrimson_female2_7	ab2	1	-1	2	2	6	0	6	-1	5	0	10	4	9	0	6	0	11	0	12	0
Ir25a-QF2KI/QUAS-CsChrimson(11C)	ab2_Ir25aQF2KI_QUASChrimson_male1_1	ab2	1	1	2	0	6	1	4	1	5	3	8	-2	9	0	12	0	15	0	16	0
Ir25a-QF2KI/QUAS-CsChrimson(11C)	ab2_Ir25aQF2KI_QUASChrimson_male1_4	ab2	2	0	0	0	1	0	2	0	10	-2	10	1	12	4	12	0	13	1	12	0
Ir25a-QF2KI/QUAS-CsChrimson(11C)	ab2_Ir25aQF2KI_QUASChrimson_male1_5	ab2	0	0	1	0	6	0	7	0	6	0	8	0	11	0	11	0	11	1	12	1
Ir25a-QF2KI/QUAS-CsChrimson(11C)	ab2_Ir25aQF2KI_QUASChrimson_male3_1	ab2																	10	0	12	-2
			1.5	0			4.5	0			7.5	0			11	0			12	-1
			4	0			4	0			7.5	0			10.5	0			12	0.5
			1.5	1			2.5	-1			4	-1			8	3			8	1
			1	0			3	0			8	2			9	0			11.5	0
			3	0			3	0			5	-0.5			4.5	0			8.5	1.5
			1.5	0.5			6	-0.5			7.5	2			7.5	0			11.5	0
			1.5	0.5			5	1			6.5	0.5			10.5	0			15.5	0
			1	0			1.5	0			10	-0.5			12	2			12.5	0.5
			0.5	0			6.5	0			7	0			11	0			11.5	1
																			11	-1
		mean	1.72222	0.222222			4	-0.0555556			7	0.277778			9.33333	0.555556			11.4	0.25
		SD	1.0304	0.342467			1.56347	0.496904			1.63299	1.00308			2.21108	1.06574			1.97231	0.782624
		SE	0.343467	0.114156			0.521157	0.165635			0.544331	0.334361			0.737028	0.355247			0.624148	0.247666
genotype	file name	sensilla	25_A	25_B	25_A	25_B	50_A	50_B	50_A	50_B	75_A	75_B	75_A	75_B	100_A	100_B	100_A	100_B	150_A	150_B	150_A	150_B
Ir25a-QF2KI/QUAS-CsChrimson(11C)	ab3_Ir25aQF2KI_QUASChrimson_female1_1	ab3	4	13	7	10	9	14	9	18	16	21	16	20	16	26	13	25	9	31	7	34
Ir25a-QF2KI/QUAS-CsChrimson(11C)	ab3_Ir25aQF2KI_QUASChrimson_female1_2	ab3	2	12	4	6	10	16	13	16	13	20	10	18	12	24	10	30	8	27	11	30
Ir25a-QF2KI/QUAS-CsChrimson(11C)	ab3_Ir25aQF2KI_QUASChrimson_female1_3	ab3	3	3	2	4	7	7	5	10	11	14	9	17	11	20	13	20	19	28	16	33
Ir25a-QF2KI/QUAS-CsChrimson(11C)	ab3_Ir25aQF2KI_QUASChrimson_female1_4	ab3	2	5	5	4	12	8	4	7	7	11	12	13	10	13	12	15	8	21	15	18
Ir25a-QF2KI/QUAS-CsChrimson(11C)	ab3_Ir25aQF2KI_QUASChrimson_female1_5	ab3	3	3	2	2	7	6	5	7	7	11	8	12	13	16	10	16	8	29	8	30
Ir25a-QF2KI/QUAS-CsChrimson(11C)	ab3_Ir25aQF2KI_QUASChrimson_female2_2	ab3	4	3	4	7	9	6	5	8	10	12	12	12	11	14	12	14	7	32	7	27
Ir25a-QF2KI/QUAS-CsChrimson(11C)	ab3_Ir25aQF2KI_QUASChrimson_female2_4	ab3	3	3	4	6	5	6	10	8	5	11	8	12	5	12	8	11	9	19	11	16
Ir25a-QF2KI/QUAS-CsChrimson(11C)	ab3_Ir25aQF2KI_QUASChrimson_male1_1	ab3	5	7	4	10	11	16	5	16	12	22	6	23
Ir25a-QF2KI/QUAS-CsChrimson(11C)	ab3_Ir25aQF2KI_QUASChrimson_male1_1	ab3	3	9	6	11	12	16	9	18					14	25	11	28
Ir25a-QF2KI/QUAS-CsChrimson(11C)	ab3_Ir25aQF2KI_QUASChrimson_male1_6	ab3	1	5	4	8	6	10	4	14	7	18	11	15	5	26	10	20	12	26	9	32
Ir25a-QF2KI/QUAS-CsChrimson(11C)	ab3_Ir25aQF2KI_QUASChrimson_male1_7	ab3	1	2	2	3	4	10	5	10	12	12	10	14	13	15	14	11	11	23	12	24
			5.5	11.5			9	16			16	20.5			14.5	25.5			8	32.5
			3	9			11.5	16			11.5	19			11	27			9.5	28.5
			2.5	3.5			6	8.5			10	15.5			12	20			17.5	30.5
			3.5	4.5			8	7.5			9.5	12			11	14			11.5	19.5
			2.5	2.5			6	6.5			7.5	11.5			11.5	16			8	29.5
			4	5			7	7			11	12			11.5	14			7	29.5
			3.5	4.5			7.5	7			6.5	11.5			6.5	11.5			10	17.5
			4.5	8.5			8	16			9	22.5			12.5	26.5			10.5	29
			4.5	10			10.5	17			9	16.5			7.5	23			11.5	23.5
			2.5	6.5			5	12			11	13			13.5	13
			1.5	2.5			4.5	10
		mean	3.40909	6.18182			7.54545	11.2273			10.1	15.4			11.15	19.05			10.3889	26.6667
		SD	1.10409	2.97927			2.08299	4.0808			2.46779	3.87169			2.33506	5.75087			2.92288	4.93288
		SE	0.332556	0.89737			0.627406	1.22916			0.780947	1.22522			0.738943	1.8199			0.974292	1.64429
		0.5V	-0.36	1.72		0.4	0.34					0.5V	0.29	0.36		0.46	0.24
		1V	0.29	4		0.48	0.52					1V	-0.21	0.57		0.28	0.16
		1.5V	0.14	7		0.39	0.54					1.5V	0	0		0.26	0.1
		2V	0.78	9.3		0.43	0.74					2V	0.29	-0.14		0.39	0.13
		3V	0	11.4		0.57	0.62					3V	0.29	0		0.14	0.35
		0.5V	-0.07	3.41		0.34	0.33					0.5V	0.36	6.18				0.24	0.9
		1V	0.29	7.55		0.24	0.63					1V	0.57	11.23				0.16	1.23
		1.5V	0.29	10.1		0.3	0.78					1.5V	0	15.4				0.1	1.23
		2V	-0.07	11.15		0.26	0.74					2V	-0.14	19.1				0.13	1.82
		3V	0.57	10.4		0.12	0.97					3V	0	26.7				0.35	1.64
genotype	file name	sensilla	200V_A	200V_B	200V_A	200V_B	150V_A	150V_B	150V_A	150V_B
Ir25a-QF2KI; QUAS-CsChrimson(11C)/Or67bG4>UASmCD8GFP	ab9_Ir25aQF2KI_QUASChrimson_Or67bGFP_female1(200, 3 sensilla)	ab9	-2	15	0	11
Ir25a-QF2KI; QUAS-CsChrimson(11C)/Or67bG4>UASmCD8GFP	ab9_Ir25aQF2KI_QUASChrimson_Or67bGFP_female1(200, 3 sensilla)	ab9	-3	19	-1	12
Ir25a-QF2KI; QUAS-CsChrimson(11C)/Or67bG4>UASmCD8GFP	ab9_Ir25aQF2KI_QUASChrimson_Or67bGFP_female1(200, 3 sensilla)	ab9	-3	12	-2	11
Ir25a-QF2KI; QUAS-CsChrimson(11C)/Or67bG4>UASmCD8GFP	ab9_Ir25aQF2KI_QUASChrimson_Or67bGFP_female2_1(200, 150, 100)	ab9	1	13	4	10	-2	7	0	5
Ir25a-QF2KI; QUAS-CsChrimson(11C)/Or67bG4>UASmCD8GFP	ab9_Ir25aQF2KI_QUASChrimson_Or67bGFP_female2_2(100, 150, 200)	ab9	2	18	0	22	4	16	3	15
			-1	13
			-2	15.5
			-2.5	11.5
			2.5	11.5
			1	20
		average	-0.4	14.3
		SD	1.88149	3.20312									No ATR	ATR
		SE	0.841453	1.43252								ab9A	0.4	-0.4		0.33	0.84
												ab9B	0.84	14.3		0.37	1.43
No ATR
genotype	file name	sensilla	200V_A	200V_B	200V_A	200V_B	150V_A	150V_B	150V_A	150V_B
Ir25a-QF2KI; QUAS-CsChrimson(11C)/Or67bG4>UASmCD8GFP	ab9_Ir25aQF2KI_QUASChrimson_Or67bGFP_female1(200, 3 sensilla)	ab9	2	2	0	1	0	-2	2	0
Ir25a-QF2KI; QUAS-CsChrimson(11C)/Or67bG4>UASmCD8GFP	ab9_Ir25aQF2QUASChr_Or67bmCD8GFP_female2_2(200, 150)	ab9	0	-1	2	2	2	-1	0	3
Ir25a-QF2KI; QUAS-CsChrimson(11C)/Or67bG4>UASmCD8GFP	ab9_Ir25aQF2QUASChr_Or67bmCD8GFP_female2_1(200, 150)	ab9	1	2	-2	0	2	0	1	-2
Ir25a-QF2KI; QUAS-CsChrimson(11C)/Or67bG4>UASmCD8GFP	ab9_Ir25aQF2QUASChr_Or67bmCD8GFP_female1_1(200, 150)	ab9	2	0	-3	-2	3	2	0	-2
Ir25a-QF2KI; QUAS-CsChrimson(11C)/Or67bG4>UASmCD8GFP	ab9_Ir25aQF2KI_QUASChrimson_Or67bGFP_female2_2(100, 150, 200)	ab9	0	-1	2	2	-1	0	2	2
			1	1.5
			1	0.5
			-0.5	1
			-0.5	-1
			1	0.5
		average	0.4	0.5
		SD	0.734847	0.83666
		SE	0.328644	0.374177
