# Supplementary material for: Chemoreceptor co-expression in Drosophila melanogaster olfactory neurons
Source: eLife. 2022 Apr 20;11:e72599. doi: 10.7554/eLife.72599 (PMC9020824; doi:10.7554/eLife.72599)
Supplement: Figure 6—source data 1. [file elife-72599-fig6-data1.xlsx]

## Sheet: Ab3 Raw Data
IR25A MUT													Red = excluded
Odorant	Neuron	Sensillum 1	Sensillum 2	Sensillum 3	Sensillum 4	Sensillum 5	Sensillum 6	Sensillum 7	Sensillum 8	Sensillum 9	Sensillum 10		MO = mineral oil
MO	A	16	4	2	4	-1	2	53	-3	0	-1
MO	B	6	-1	2	9	7	2	40	-2	3	-5
Pentyl acetate	A	94	102	86	77	74	103	-7	42	43	24
Pentyl acetate	B	43	90	57	65	92	55	96	50	76	50
1-octen-3-ol	A	49	4	27	32	31	29	27	30	12	-3
1-octen-3-ol	B	104	2	50	56	75	40	74	46	87	65
Propionic acid	A	19	24	7	-2	11	14	5	0	0	-13
Propionic acid	B	-1	-3	9	12	5	12	20	10	11	-2
Ethyl acetate	A	39	41	12	5	22	13	25	1	2	-3
Ethyl acetate	B	16	12	2	4	1	6	7	1	5	6
Benzaldehyde	A	18	3	4	7	1	7	9	0	-1	5
Benzaldehyde	B	-2	0	-1	13	19	20	-4	5	2	0
2,3-butanedione	A	63	21	23	24	5	24	1	28	16	4
2,3-butanedione	B	40	67	43	61	42	35	-1	33	20	32
1,4-diaminobutane	A	-7	5	10	8	24	9	10	-1	2	0
1,4-diaminobutane	B	5	11	-2	12	1	12	2	5	3	-1
Ethyl butyrate	A	71	108	90	85	85	129	3	26	32	38
Ethyl butyrate	B	16	56	40	15	17	16	30	18	29	7
Methyl salicylate	A	1	1	6	6	1	-1	8	1	0	0
Methyl salicylate	B	2	9	10	0	5	2	5	3	6	-2
Pyrrolidine	A	17	19	67	23	16	9	46	48	49	26
Pyrrolidine	B	15	16	30	13	9	0	55	22	32	12
Phenyl acetaldehyde	A	11	4	1	0	8	3	17	5	-6	-8
Phenyl acetaldehyde	B	-2	10	13	25	32	33	46	28	29	23
Phenethylamine	A	17	12	7	3	1	12	3	0	-2	-3
Phenethylamine	B	3	14	16	19	14	6	12	14	14	-10
p-cresol	A	12	-3	9	4	3	2	16	8	-2	-6
p-cresol	B	-1	2	5	1	17	-1	1	-1	7	20
WT
Odorant	Neuron	Sensillum 1	Sensillum 2	Sensillum 3	Sensillum 4	Sensillum 5	Sensillum 6	Sensillum 7
MO	A	2	4	0	10	7	3	17
MO	B	4	-1	1	15	16	0	4
Pentyl acetate	A	44	90	109	118	121	149	154
Pentyl acetate	B	34	23	39	52	52	41	73
1-octen-3-ol	A	49	47	87	75	71	67	59
1-octen-3-ol	B	59	42	58	62	58	87	67
Propionic acid	A	10	27	16	21	21	21	11
Propionic acid	B	-1	18	5	19	18	20	22
Ethyl acetate	A	5	24	22	17	22	27	23
Ethyl acetate	B	2	19	9	13	9	14	8
Benzaldehyde	A	-1	8	3	-7	9	-1	10
Benzaldehyde	B	-4	13	-1	6	13	23	30
2,3-butanedione	A	8	36	29	15	12	31	48
2,3-butanedione	B	54	73	22	56	49	43	66
1,4-diaminobutane	A	4	13	11	-2	14	16	19
1,4-diaminobutane	B	1	12	2	19	13	18	11
Ethyl butyrate	A	44	54	129	119	104	112	136
Ethyl butyrate	B	38	20	40	34	14	37	30
Methyl salicylate	A	-3	9	-2	7	5	2	16
Methyl salicylate	B	-1	19	0	15	12	6	12
Pyrrolidine	A	21	18	30	20	5	53	33
Pyrrolidine	B	26	15	0	20	19	16	10
Phenyl acetaldehyde	A	9	10	9	51	11	1	14
Phenyl acetaldehyde	B	-5	24	21	19	70	54	61
Phenethylamine	A	4	5	3	20	14	9	15
Phenethylamine	B	16	10	10	13	6	12	7
p-cresol	A	3	11	2	11	6	19	11
p-cresol	B	6	5	-1	1	0	3	3
ORCO MUT
Odorant	Sensillum 1	Sensillum 2	Sensillum 3	Sensillum 4	Sensillum 5
MO	2	2	0	0	2
Pentyl acetate	-1	0	0	0	0
1-octen-3-ol	1	0	0	0	0
Propionic acid	0	0	0	0	0
Ethyl acetate	0	0	0	0	0
Benzaldehyde	1	0	8	0	0
2,3-butanedione	0	6	0	0	0
1,4-diaminobutane	-1	0	0	0	0
Ethyl butyrate	1	0	0	0	0
Methyl salicylate	1	2	0	0	0
Pyrrolidine	1	10	0	0	0
Phenyl acetaldehyde	1	0	0	0	0
Phenethylamine	9	1	2	0	0
p-cresol	-1	-1	0	0	0

## Sheet: Ab3a Analyses
ab3A WT Kruskal-Wallis test	Uncorrected Dunn's test	Mean rank diff.	Significant?	Summary	Individual P Value	A-?
P value <0.0001	MO vs. Pentyl acetate	-67.79	Yes	****	<0.0001	B	Pentyl acetate
Approximate P value	MO vs. 1-octen-3-ol	-60.14	Yes	****	<0.0001	C	1-octen-3-ol
P value summary ****	MO vs. Propionic acid	-31.14	Yes	*	0.0404	D	Propionic acid
Medians vary signif. (P < 0.05)? Yes	MO vs. Ethyl acetate	-34.93	Yes	*	0.0215	E	Ethyl acetate
Number of groups: 14	MO vs. Benzaldehyde	6.214	No	ns	0.6825	F	Benzaldehyde
Kruskal-Wallis statistic: 70.69	MO vs. 2,3-butanedione	-36	Yes	*	0.0178	G	2,3-butanedione
Data summary:	MO vs. 1,4-diaminobutane	-13.93	No	ns	0.3593	H	1,4-diaminobutane
Number of treatments (columns) = 14	MO vs. Ethyl butyrate	-65.93	Yes	****	<0.0001	I	Ethyl butyrate
Number of values (total) = 98	MO vs. Methyl salicylate	2.643	No	ns	0.8619	J	Methyl salicylate
Number of families = 1	MO vs. Pyrrolidine	-37.21	Yes	*	0.0143	K	Pyrrolidine
Number of comparisons per family - 13	MO vs. Phenyl acetaldehyde	-15.43	No	ns	0.3099	L	Phenyl acetaldehyde
Alpha = 0.05	MO vs. Phenethylamine	-10.57	No	ns	0.4865	M	Phenethylamine
	MO vs. p-cresol	-8.786	No	ns	0.5631	N	p-cresol
	Test details	Mean rank 1	Mean rank 2	Mean rank diff.	n1	n2	Z
	MO vs. Pentyl acetate	22.86	90.64	-67.79	7	7	4.462
	MO vs. 1-octen-3-ol	22.86	83	-60.14	7	7	3.959
	MO vs. Propionic acid	22.86	54	-31.14	7	7	2.05
	MO vs. Ethyl acetate	22.86	57.79	-34.93	7	7	2.299
	MO vs. Benzaldehyde	22.86	16.64	6.214	7	7	0.409
	MO vs. 2,3-butanedione	22.86	58.86	-36	7	7	2.37
	MO vs. 1,4-diaminobutane	22.86	36.79	-13.93	7	7	0.9168
	MO vs. Ethyl butyrate	22.86	88.79	-65.93	7	7	4.339
	MO vs. Methyl salicylate	22.86	20.21	2.643	7	7	0.174
	MO vs. Pyrrolidine	22.86	60.07	-37.21	7	7	2.449
	MO vs. Phenyl acetaldehyde	22.86	38.29	-15.43	7	7	1.016
	MO vs. Phenethylamine	22.86	33.43	-10.57	7	7	0.6958
	MO vs. p-cresol	22.86	31.64	-8.786	7	7	0.5783
ab3A Ir25a mut Kruskal-Wallis test	Uncorrected Dunn's test	Mean rank diff.	Significant?	Summary	Individual P Value	A-?
P value <0.0001	MO vs. Pentyl acetate	-79.67	Yes	****	<0.0001	B	Pentyl acetate
Approximate P value	MO vs. 1-octen-3-ol	-47.89	Yes	**	0.0054	C	1-octen-3-ol
P value summary ****	MO vs. Propionic acid	-14.61	No	ns	0.3957	D	Propionic acid
Medians vary signif. (P < 0.05)? Yes	MO vs. Ethyl acetate	-29.83	No	ns	0.0829	E	Ethyl acetate
Number of groups: 14	MO vs. Benzaldehyde	-11.67	No	ns	0.4977	F	Benzaldehyde
Kruskal-Wallis statistic: 73.39	MO vs. 2,3-butanedione	-49.06	Yes	**	0.0044	G	2,3-butanedione
Data summary:	MO vs. 1,4-diaminobutane	-12.44	No	ns	0.4695	H	1,4-diaminobutane
Number of treatments (columns) = 14	MO vs. Ethyl butyrate	-79.33	Yes	****	<0.0001	I	Ethyl butyrate
Number of values (total) = 126	MO vs. Methyl salicylate	1.333	No	ns	0.9382	J	Methyl salicylate
Number of families = 1	MO vs. Pyrrolidine	-57.94	Yes	***	0.0008	K	Pyrrolidine
Number of comparisons per family - 13	MO vs. Phenyl acetaldehyde	-2.778	No	ns	0.8717	L	Phenyl acetaldehyde
Alpha = 0.05	MO vs. Phenethylamine	-10.33	No	ns	0.5481	M	Phenethylamine
	MO vs. p-cresol	-4.778	No	ns	0.7812	N	p-cresol
	Test details	Mean rank 1	Mean rank 2	Mean rank diff.	n1	n2	Z
	MO vs. Pentyl acetate	35	114.7	-79.67	9	9	4.631
	MO vs. 1-octen-3-ol	35	82.89	-47.89	9	9	2.784
	MO vs. Propionic acid	35	49.61	-14.61	9	9	0.8493
	MO vs. Ethyl acetate	35	64.83	-29.83	9	9	1.734
	MO vs. Benzaldehyde	35	46.67	-11.67	9	9	0.6782
	MO vs. 2,3-butanedione	35	84.06	-49.06	9	9	2.852
	MO vs. 1,4-diaminobutane	35	47.44	-12.44	9	9	0.7234
	MO vs. Ethyl butyrate	35	114.3	-79.33	9	9	4.612
	MO vs. Methyl salicylate	35	33.67	1.333	9	9	0.0775
	MO vs. Pyrrolidine	35	92.94	-57.94	9	9	3.368
	MO vs. Phenyl acetaldehyde	35	37.78	-2.778	9	9	0.1615
	MO vs. Phenethylamine	35	45.33	-10.33	9	9	0.6007
	MO vs. p-cresol	35	39.78	-4.778	9	9	0.2777
ab3a two geno (Mut v WT), Mann Whitney tests	MO	Pentyl acetate	1-octen-3-ol	Propionic acid	Ethyl acetate	Benzaldehyde	2,3-butanedione
P value	0.1191	0.0164	0.0004	0.0441	0.2195	0.7742	0.5177
Exact or approximate P value?	Exact	Exact	Exact	Exact	Exact	Exact	Exact
P value summary	ns	*	***	*	ns	ns	ns
Significantly different (P < 0.05)?	No	Yes	Yes	Yes	No	No	No
One- or two-tailed P value?	Two-tailed	Two-tailed	Two-tailed	Two-tailed	Two-tailed	Two-tailed	Two-tailed
Sum of ranks in column A,B	74.50 , 61.50	82 , 54	89.50 , 46.50	78.50 , 57.50	71.50 , 64.50	56.50 , 79.50	66 , 70
Mann-Whitney U	16.5	9	1.5	12.5	19.5	28.5	25
Difference between medians:
Median of column A	4.000, n=7	118.0, n=7	67.00, n=7	21.00, n=7	22.00, n=7	3.000, n=7	29.00, n=7
Median of column B	2.000, n=9	77.00, n=9	29.00, n=9	7.000, n=9	12.00, n=9	4.000, n=9	23.00, n=9
Difference: Actual	-2	-41	-38	-14	-10	1	-6
Difference: Hodges-Lehmann	-3	-44	-41	-11	-10	1	-6
ab3a two geno (Mut v WT), Mann Whitney tests	1,4-diaminobutane	Ethyl butyrate	Methyl salicylate	Pyrrolidine	Phenyl acetaldehyde	Phenethylamine	p-cresol	Phenyl acetaldehyde (minus outlier)
P value	0.1738	0.1198	0.3346	>0.9999	0.015	0.1477	0.1056	0.0336
Exact or approximate P value?	Exact	Exact	Exact	Exact	Exact	Exact	Exact	Exact
P value summary	ns	ns	ns	ns	*	ns	ns	*
Significantly different (P < 0.05)?	No	No	No	No	Yes	No	No	Yes
One- or two-tailed P value?	Two-tailed	Two-tailed	Two-tailed	Two-tailed	Two-tailed	Two-tailed	Two-tailed	Two-tailed
Sum of ranks in column A,B	73 , 63	74.50 , 61.50	69 , 67	59 , 77	82 , 54	73.50 , 62.50	75 , 61	66 , 54
Mann-Whitney U	18	16.5	22	31	9	17.5	16	9
Difference between medians:
Median of column A	13.00, n=7	112.0, n=7	5.000, n=7	21.00, n=7	10.00, n=7	9.000, n=7	11.00, n=7	9.500, n=6
Median of column B	5.000, n=9	85.00, n=9	1.000, n=9	23.00, n=9	3.000, n=9	3.000, n=9	3.000, n=9	3.000, n=9
Difference: Actual	-8	-27	-4	2	-7	-6	-8	-6.5
Difference: Hodges-Lehmann	-6	-27	-3	1	-8	-5	-7	-7

## Sheet: Ab3b Analyses
ab3b WT Kruskal-Wallis test	Uncorrected Dunn's test	Mean rank diff.	Significant?	Summary	Individual P Value	A-?
P value <0.0001	MO vs. Pentyl acetate	-56.71	Yes	***	0.0002	B	Pentyl acetate
Approximate P value	MO vs. 1-octen-3-ol	-66.79	Yes	****	<0.0001	C	1-octen-3-ol
P value summary ****	MO vs. Propionic acid	-22	No	ns	0.1476	D	Propionic acid
Medians vary signif. (P < 0.05)? Yes	MO vs. Ethyl acetate	-11.71	No	ns	0.4407	E	Ethyl acetate
Number of groups: 14	MO vs. Benzaldehyde	-12.71	No	ns	0.4026	F	Benzaldehyde
Kruskal-Wallis statistic: 64.55	MO vs. 2,3-butanedione	-61	Yes	****	<0.0001	G	2,3-butanedione
Data summary:	MO vs. 1,4-diaminobutane	-12.43	No	ns	0.4133	H	1,4-diaminobutane
Number of treatments (columns) = 14	MO vs. Ethyl butyrate	-45.29	Yes	**	0.0029	I	Ethyl butyrate
Number of values (total) = 98	MO vs. Methyl salicylate	-7.571	No	ns	0.6182	J	Methyl salicylate
Number of families = 1	MO vs. Pyrrolidine	-23.5	No	ns	0.1219	K	Pyrrolidine
Number of comparisons per family - 13	MO vs. Phenyl acetaldehyde	-42.79	Yes	**	0.0049	L	Phenyl acetaldehyde
Alpha = 0.05	MO vs. Phenethylamine	-11.36	No	ns	0.4547	M	Phenethylamine
	MO vs. p-cresol	7.857	No	ns	0.605	N	p-cresol
	Test details	Mean rank 1	Mean rank 2	Mean rank diff.	n1	n2	Z
	MO vs. Pentyl acetate	23.36	80.07	-56.71	7	7	3.733
	MO vs. 1-octen-3-ol	23.36	90.14	-66.79	7	7	4.396
	MO vs. Propionic acid	23.36	45.36	-22	7	7	1.448
	MO vs. Ethyl acetate	23.36	35.07	-11.71	7	7	0.7711
	MO vs. Benzaldehyde	23.36	36.07	-12.71	7	7	0.8369
	MO vs. 2,3-butanedione	23.36	84.36	-61	7	7	4.015
	MO vs. 1,4-diaminobutane	23.36	35.79	-12.43	7	7	0.8181
	MO vs. Ethyl butyrate	23.36	68.64	-45.29	7	7	2.981
	MO vs. Methyl salicylate	23.36	30.93	-7.571	7	7	0.4984
	MO vs. Pyrrolidine	23.36	46.86	-23.5	7	7	1.547
	MO vs. Phenyl acetaldehyde	23.36	66.14	-42.79	7	7	2.816
	MO vs. Phenethylamine	23.36	34.71	-11.36	7	7	0.7476
	MO vs. p-cresol	23.36	15.5	7.857	7	7	0.5172
ab3b Ir25a mut Kruskal-Wallis test	Uncorrected Dunn's test	Mean rank diff.	Significant?	Summary	Individual P Value	A-?
P value <0.0001	MO vs. Pentyl acetate	-86.94	Yes	****	<0.0001	B	Pentyl acetate
Approximate P value	MO vs. 1-octen-3-ol	-76.67	Yes	****	<0.0001	C	1-octen-3-ol
P value summary ****	MO vs. Propionic acid	-11.11	No	ns	0.5184	D	Propionic acid
Medians vary signif. (P < 0.05)? Yes	MO vs. Ethyl acetate	-13.72	No	ns	0.4251	E	Ethyl acetate
Number of groups: 14	MO vs. Benzaldehyde	-11.44	No	ns	0.5059	F	Benzaldehyde
Kruskal-Wallis statistic: 78.97	MO vs. 2,3-butanedione	-75.28	Yes	****	<0.0001	G	2,3-butanedione
Data summary:	MO vs. 1,4-diaminobutane	-9.167	No	ns	0.5942	H	1,4-diaminobutane
Number of treatments (columns) = 14	MO vs. Ethyl butyrate	-55.39	Yes	**	0.0013	I	Ethyl butyrate
Number of values (total) = 126	MO vs. Methyl salicylate	-5.722	No	ns	0.7394	J	Methyl salicylate
Number of families = 1	MO vs. Pyrrolidine	-42.17	Yes	*	0.0142	K	Pyrrolidine
Number of comparisons per family - 13	MO vs. Phenyl acetaldehyde	-48.56	Yes	**	0.0048	L	Phenyl acetaldehyde
Alpha = 0.05	MO vs. Phenethylamine	-30.17	No	ns	0.0795	M	Phenethylamine
	MO vs. p-cresol	-9.667	No	ns	0.5742	N	p-cresol
	Test details	Mean rank 1	Mean rank 2	Mean rank diff.	n1	n2	Z
	MO vs. Pentyl acetate	29.5	116.4	-86.94	9	9	5.054
	MO vs. 1-octen-3-ol	29.5	106.2	-76.67	9	9	4.456
	MO vs. Propionic acid	29.5	40.61	-11.11	9	9	0.6458
	MO vs. Ethyl acetate	29.5	43.22	-13.72	9	9	0.7976
	MO vs. Benzaldehyde	29.5	40.94	-11.44	9	9	0.6652
	MO vs. 2,3-butanedione	29.5	104.8	-75.28	9	9	4.376
	MO vs. 1,4-diaminobutane	29.5	38.67	-9.167	9	9	0.5328
	MO vs. Ethyl butyrate	29.5	84.89	-55.39	9	9	3.22
	MO vs. Methyl salicylate	29.5	35.22	-5.722	9	9	0.3326
	MO vs. Pyrrolidine	29.5	71.67	-42.17	9	9	2.451
	MO vs. Phenyl acetaldehyde	29.5	78.06	-48.56	9	9	2.822
	MO vs. Phenethylamine	29.5	59.67	-30.17	9	9	1.753
	MO vs. p-cresol	29.5	39.17	-9.667	9	9	0.5619
ab3b two geno (Mut v WT), Mann Whitney tests	MO	Pentyl acetate	1-octen-3-ol	Propionic acid	Ethyl acetate	Benzaldehyde	2,3-butanedione
P value	0.4856	0.0385	0.699	0.0388	0.0747	0.4834	0.1493
Exact or approximate P value?	Exact	Exact	Exact	Exact	Exact	Exact	Exact
P value summary	ns	*	ns	*	ns	ns	ns
Significantly different (P < 0.05)?	No	Yes	No	Yes	No	No	No
One- or two-tailed P value?	Two-tailed	Two-tailed	Two-tailed	Two-tailed	Two-tailed	Two-tailed	Two-tailed
Sum of ranks in column A,B	66.50 , 69.50	40 , 96	63.50 , 72.50	79 , 57	76.50 , 59.50	66.50 , 69.50	73.50 , 62.50
Mann-Whitney U	24.5	12	27.5	12	14.5	24.5	17.5
Difference between medians:
Median of column A	4.000, n=7	41.00, n=7	59.00, n=7	18.00, n=7	9.000, n=7	13.00, n=7	54.00, n=7
Median of column B	2.000, n=9	57.00, n=9	56.00, n=9	9.000, n=9	5.000, n=9	2.000, n=9	40.00, n=9
Difference: Actual	-2	16	-3	-9	-4	-11	-14
Difference: Hodges-Lehmann	-2	17	-2	-9	-5	-6	-12
ab3b two geno (Mut v WT), Mann Whitney tests	1,4-diaminobutane	Ethyl butyrate	Methyl salicylate	Pyrrolidine	Phenyl acetaldehyde	Phenethylamine	p-cresol
P value	0.1054	0.2628	0.1627	>0.9999	0.6065	0.5117	0.8567
Exact or approximate P value?	Exact	Exact	Exact	Exact	Exact	Exact	Exact
P value summary	ns	ns	ns	ns	ns	ns	ns
Significantly different (P < 0.05)?	No	No	No	No	No	No	No
One- or two-tailed P value?	Two-tailed	Two-tailed	Two-tailed	Two-tailed	Two-tailed	Two-tailed	Two-tailed
Sum of ranks in column A,B	75 , 61	70.50 , 65.50	73 , 63	59.50 , 76.50	65 , 71	53 , 83	57.50 , 78.50
Mann-Whitney U	16	20.5	18	31.5	26	25	29.5
Difference between medians:
Median of column A	12.00, n=7	34.00, n=7	12.00, n=7	16.00, n=7	24.00, n=7	10.00, n=7	3.000, n=7
Median of column B	5.000, n=9	17.00, n=9	3.000, n=9	15.00, n=9	25.00, n=9	14.00, n=9	2.000, n=9
Difference: Actual	-7	-17	-9	-1	1	4	-1
Difference: Hodges-Lehmann	-7	-11	-6	0	-11	2	0

## Sheet: Ab3 Orco Mut Analyses
ab3 Orco Mut Kruskal-Wallis test	Uncorrected Dunn's test	Mean rank diff.	Significant?	Summary	Individual P Value	A-?
P value 0.0431	MO vs. Pentyl acetate	26.1	Yes	*	0.0109	B	Pentyl acetate
Approximate P value	MO vs. 1-octen-3-ol	15	No	ns	0.1433	C	1-octen-3-ol
P value summary *	MO vs. Propionic acid	20.7	Yes	*	0.0434	D	Propionic acid
Medians vary signif. (P < 0.05)? Yes	MO vs. Ethyl acetate	20.7	Yes	*	0.0434	E	Ethyl acetate
Number of groups: 14	MO vs. Benzaldehyde	7.3	No	ns	0.4763	F	Benzaldehyde
Kruskal-Wallis statistic: 22.89	MO vs. 2,3-butanedione	13.2	No	ns	0.1978	G	2,3-butanedione
Data summary:	MO vs. 1,4-diaminobutane	26.1	Yes	*	0.0109	H	1,4-diaminobutane
Number of treatments (columns) = 14	MO vs. Ethyl butyrate	15	No	ns	0.1433	I	Ethyl butyrate
Number of values (total) = 70	MO vs. Methyl salicylate	8.1	No	ns	0.4294	J	Methyl salicylate
Number of families = 1	MO vs. Pyrrolidine	6.9	No	ns	0.5008	K	Pyrrolidine
Number of comparisons per family - 13	MO vs. Phenyl acetaldehyde	15	No	ns	0.1433	L	Phenyl acetaldehyde
Alpha = 0.05	MO vs. Phenethylamine	0.2	No	ns	0.9844	M	Phenethylamine
	MO vs. p-cresol	31.5	Yes	**	0.0021	N	p-cresol
	Test details	Mean rank 1	Mean rank 2	Mean rank diff.	n1	n2	Z
	MO vs. Pentyl acetate	50.2	24.1	26.1	5	5	2.546
	MO vs. 1-octen-3-ol	50.2	35.2	15	5	5	1.463
	MO vs. Propionic acid	50.2	29.5	20.7	5	5	2.02
	MO vs. Ethyl acetate	50.2	29.5	20.7	5	5	2.02
	MO vs. Benzaldehyde	50.2	42.9	7.3	5	5	0.7122
	MO vs. 2,3-butanedione	50.2	37	13.2	5	5	1.288
	MO vs. 1,4-diaminobutane	50.2	24.1	26.1	5	5	2.546
	MO vs. Ethyl butyrate	50.2	35.2	15	5	5	1.463
	MO vs. Methyl salicylate	50.2	42.1	8.1	5	5	0.7903
	MO vs. Pyrrolidine	50.2	43.3	6.9	5	5	0.6732
	MO vs. Phenyl acetaldehyde	50.2	35.2	15	5	5	1.463
	MO vs. Phenethylamine	50.2	50	0.2	5	5	0.01951
	MO vs. p-cresol	50.2	18.7	31.5	5	5	3.073

## Sheet: Palp Raw Data
pb1A WT	Mineral oil	Propionic acid	1-octen-3-ol	Phenylacetaldehyde	Phenethylamine	1-4-Diaminobutane	Pyrrolidine	Methyl Salicylate	Benzaldehyde	p-Cresol	Ethyl acetate	Pentyl acetate	Ethyl Butyrate	2,3 Butanedione
Fly 1	22	30	20	22	2	11	-9	0	77	12	76	33	72	60
Fly 2	34	47	28	38	1	3	-3	2	94	9	98	48	90	70
Fly 3	12	20	28	18	6	4	-5	2	50	4	79	21	89	50
Fly 4	11	27	28	26	2	9	-6	0	74	4	63	33	75	72
Fly 5	23	38	39	38	13	15	-10	5	70	42	88	50	80	94
Fly 6	12			38	10				88		92	33	90	80
pb1A Ir25a mut	1. Mineral oil	10. Propionic acid	6. 1-octen-3-ol	8. Phenylacetaldehyde	9. Phenothylamine	11. 1-4-Diaminobutane	12. Pyrrolidine	14. Methyl Salicylate	4. Benzaldehyde	13. p-Cresol	2. Ethyl acetate	3. Pentyl acetate	5. Ethyl Butyrate	7. 2,3 Butanedione
Fly 1	18	33	60	33	12	11	-11	5	73	3	68	36	70	64
Fly 2	11	29	56	44	12	16	-7	4	71	16	32	34	80	67
Fly 3	12	34	59	35	8	5	-8	11	85	11	22	33	73	72
Fly 4	22	31	48	38	10				74		73	30	84	78
Fly 5	9	34	52	37	16	9	-12	3	70	18	54	30	83	90
Fly 6	18	40	40	43	8	12	-6	10	61	12	67	42	72	63
Fly 7	11	30	41	26	4	7	-10	7	61	12	69	48	65	60
Fly 8	23	32	45	35	3	14	-9	5	68	8	60	40	52	48
pb1B Wildtype	1. Mineral oil	10. Propionic acid	6. 1-octen-3-ol	8. Phenylacetaldehyde	9. Phenothylamine	11. 1-4-Diaminobutane	12. Pyrrolidine	14. Methyl Salicylate	4. Benzaldehyde	13. p-Cresol	2. Ethyl acetate	3. Pentyl acetate	5. Ethyl Butyrate	7. 2,3 Butanedione
Fly 1	2	-2	24	0	0	2	-2	0	NA	63	NA	-2	NA	NA
Fly 2	-4	-4	34	-1	2	1	-1	0	NA	78	NA	-1	NA	NA
Fly 3	-1	1	25	1	2	2	-3	0	NA	40	NA	-2	NA	NA
Fly 4	-1	-2	20	0	0	-1	15	0	NA	60	NA	-5	NA	NA
Fly 5	-2	-3	18	-4	2	0	26	3	NA	13	NA	-4	NA	NA
Fly 6	2			0	2				NA		NA	-3	NA	NA
pb1B Ir25a mut	1. Mineral oil	10. Propionic acid	6. 1-octen-3-ol	8. Phenylacetaldehyde	9. Phenothylamine	11. 1-4-Diaminobutane	12. Pyrrolidine	14. Methyl Salicylate	4. Benzaldehyde	13. p-Cresol	2. Ethyl acetate	3. Pentyl acetate	5. Ethyl Butyrate	7. 2,3 Butanedione
Fly 1	0	0	NA	-5	0	-2	22	2	NA	69	NA	-6	NA	NA
Fly 2	-2	-3	NA	-5	-5	-4	17	7	NA	56	NA	-5	NA	NA
Fly 3	-6	-3	NA	-2	0	-3	10	3	NA	60	-3	-5	NA	NA
Fly 4	-2	-4	NA	-6	-2				NA		NA	0	NA	NA
Fly 5	-3	0	NA	-3	-4	1	6	10	NA	52	NA	-2	NA	NA
Fly 6	-5	-4	NA	-3	1	-4	10	0	NA	45	NA	NA	NA	NA
Fly 7	0	-2	NA	-5	0	2	7	0	NA	47	NA	-6	NA	NA
Fly 8	-7	0	NA	-5	0	2	3	-1	NA	50	NA	-2	NA	NA
pb2A WT	1. Mineral oil	10. Propionic acid	6. 1-octen-3-ol	8. Phenylacetaldehyde	9. Phenothylamine	11. 1-4-Diaminobutane	12. Pyrrolidine	14. Methyl Salicylate	4. Benzaldehyde	13. p-Cresol	2. Ethyl acetate	3. Pentyl acetate	5. Ethyl Butyrate	7. 2,3 Butanedione
Fly1	-2	9	-6	12	0	0	-6	0	23	12	12	3	28	8
Fly2	-2	5	13	17	4	4	-2	12	22	10	1	25	25	14
Fly3	-4	-3	5	24	0	0	12	2	45	15	30	12	29	14
Fly4	0	-4	-4	8	2	1	-7	0	20	24	12	8	23	8
Fly5	-4	-3	14	11	0	-1	-8	4	32	24	16	22	36	15
Fly6	-2	-1	13	9	-1	-1	-5	8	22	19	10	24	28	8
Fly7	0	2	15	23	-2	2	-10	12	40	23	6	24	36	18
									Note: A or B activation????
pb2A Mut	1. Mineral oil	10. Propionic acid	6. 1-octen-3-ol	8. Phenylacetaldehyde	9. Phenothylamine	11. 1-4-Diaminobutane	12. Pyrrolidine	14. Methyl Salicylate	4. Benzaldehyde	13. p-Cresol	2. Ethyl acetate	3. Pentyl acetate	5. Ethyl Butyrate	7. 2,3 Butanedione
Fly1	3	0	1	-2	1	-2	-7	2	22	16	13	18	23	2
Fly2	-4	-3	-2	10	-1	-2	12	2	25	10	26	19	26	16
Fly3	-2	2	8	12	2	-3	10	-1	31	8	32	14	23	8
Fly4	-1		7	13					23		11	15	23	10
Fly5	-3	-1	2	20	4	-3	8	0	20	9	12	14	21	4
Fly6	1	0	-3	12	1	-4	6	3	22	14	6	16	18	12
Fly7	-7	0	-2	17	0				12		8	9	20	8
Fly8	-1	0	-8	20	-3	3	3	5	22	20	9	16	15	3
pb2B WT	1. Mineral oil	10. Propionic acid	6. 1-octen-3-ol	8. Phenylacetaldehyde	9. Phenothylamine	11. 1-4-Diaminobutane	12. Pyrrolidine	14. Methyl Salicylate	4. Benzaldehyde	13. p-Cresol	2. Ethyl acetate	3. Pentyl acetate	5. Ethyl Butyrate	7. 2,3 Butanedione
Fly1	0	0	-6	2	1	1	-6	0	34	42	-2	-5	-7	-7
Fly2	0	3	-6	-3	0	0	-6	2	45	50	-4	-10	-10	-4
Fly3	-2	-3	-14	-7	-3	2	-3	3	55	60	-6	-6	-11	-12
Fly4	0	-9	-15	-6	-2	0	7	0	63	50	-4	-5	-10	-5
Fly5	-2	-3	-15	-4	-2	0	-4	0	66	63	-3	-8	-10	-5
Fly6	0	1	-12	-4	0	0	-6	-3	40	48	-1	-7	-6	-3
Fly7	0	0	-10	-8	-4	-3	-8	-5	48	46	-4	-13	-10	-6
									Note: A or B activation????
pb2B Mut	1. Mineral oil	10. Propionic acid	6. 1-octen-3-ol	8. Phenylacetaldehyde	9. Phenothylamine	11. 1-4-Diaminobutane	12. Pyrrolidine	14. Methyl Salicylate	4. Benzaldehyde	13. p-Cresol	2. Ethyl acetate	3. Pentyl acetate	5. Ethyl Butyrate	7. 2,3 Butanedione
Fly1	1	-2	-6	0	-3	0	-4	3	46	65	0	1	-4	1
Fly2	-2	4	-5	-2	0	0	-4	0	43	36	-3	4	-6	-2
Fly3	-4	2	-6	0	2	0	-6	-2	54	50	-5	-4	-6	-3
Fly4	-3		-8	1					43		-3	-3	-7	-1
Fly5	0	-3	-6	-2	-2	1	-9	-3	43	60	-3	-5	-10	3
Fly6	5	0	-10	-2	-1	0	-10	0	42	56	-6	-3	-5	2
Fly7	2	-2	-18	-7	-2				40		-10	-7	-13	-7
Fly8	-4	-1	-11	-4	0	-2	-3	-2	42	54	-2	-8	-12	-4
pb3A WT	1. Mineral oil	10. Propionic acid	6. 1-octen-3-ol	8. Phenylacetaldehyde	9. Phenothylamine	11. 1-4-Diaminobutane	12. Pyrrolidine	14. Methyl Salicylate	4. Benzaldehyde	13. p-Cresol	2. Ethyl acetate	3. Pentyl acetate	5. Ethyl Butyrate	7. 2,3 Butanedione
Fly1	-2		43						6		1	36	60
Fly2	3		38	8					-4		-4	32	65	5
Fly3	-4	8	46	0	-3	2	-1	8	4	1	-1	28	83	6
Fly4	1	-2	64	14	4	-1	1	7	2	0	-5	42	95	8
Fly5	-2	-4	53	4	0	-2	2	8	8	0	14	54	90	7
Fly6	6		35						-6		8	32	72	-4
Fly7	6	4	38	3	-2	0	5	6	8	-3	6	32	60	-2
Fly8	-1	1	35	-3	3	4	-1	8	0	-3	2	32	69	-2
Fly9	2	4	38	-3	3	-5	-4	12	8	-2	-3	29	66	-3
pb3A Mut	1. Mineral oil	10. Propionic acid	6. 1-octen-3-ol	8. Phenylacetaldehyde	9. Phenothylamine	11. 1-4-Diaminobutane	12. Pyrrolidine	14. Methyl Salicylate	4. Benzaldehyde	13. p-Cresol	2. Ethyl acetate	3. Pentyl acetate	5. Ethyl Butyrate	7. 2,3 Butanedione
Fly1	-4		47						5		14	38	76	20
Fly2	5	5	57	3	1	-4	0	14	0	4	0	36	71	18
Fly3	-3	9	49	1	3				-4		14	27	92	15
Fly4	2	8	58	4	2	1	-3	8	5	0	2	49	69	17
Fly5	-10	2	58	2	1	-5	2	11	-1	-2	14	35	89	16
Fly6	-2	10	54	5	2	10	-3	7	7	-2	4	35	68	9
Fly7	4	0	66	7	2	3	-4		16	4	6	45	62	2
Fly8	0	5	49	8	0	-1	-2	2	4	-2	-2	38	65	2
Fly9	1	2	50	1	-1	0	-8	3	-1	-6	18	40	63	6
Fly10	-7	2	47	4	-2	-2	-2	3	8	-8	-2	52	80	3
pb3B WT	1. Mineral oil	10. Propionic acid	6. 1-octen-3-ol	8. Phenylacetaldehyde	9. Phenothylamine	11. 1-4-Diaminobutane	12. Pyrrolidine	14. Methyl Salicylate	4. Benzaldehyde	13. p-Cresol	2. Ethyl acetate	3. Pentyl acetate	5. Ethyl Butyrate	7. 2,3 Butanedione
Fly1	0		NA						-1		1	37	NA
Fly2	1		NA	8					2		5	50	NA	1
Fly3	4	-2	NA	17	1	4	17	-2	1	-5	1	47	NA	3
Fly4	4	8	NA	6	7	10	13	-5	5	-3	3	56	NA	-2
Fly5	3	-4	NA	13	4	2	18	-4	12	-4	3	54	NA	12
Fly6	0		NA						4		-2	56	NA	1
Fly7	-1	0	NA	0	6	1	5	0	1	0	0	41	NA	4
Fly8	2	2	NA	13	-1	1	3	-1	2	-2	-1	54	NA	8
Fly9	-2	0	NA	7	-1	1	4	2	3	0	3	46	NA	-2
pb3B Mut	1. Mineral oil	10. Propionic acid	6. 1-octen-3-ol	8. Phenylacetaldehyde	9. Phenothylamine	11. 1-4-Diaminobutane	12. Pyrrolidine	14. Methyl Salicylate	4. Benzaldehyde	13. p-Cresol	2. Ethyl acetate	3. Pentyl acetate	5. Ethyl Butyrate	7. 2,3 Butanedione
Fly1	2		NA						2		3	46	NA	-2
Fly2	-4	0	NA	19	1	2	34	-3	2	-2	2	43	NA	-3
Fly3	-1	1	NA	18	3				5		6	50	NA	-3
Fly4	0	-3	NA	12	2	0	36	-2	4	2	5	53	NA	-2
Fly5	0	-2	NA	12	-3	1	34	2	3	-2	-3	57	NA	-4
Fly6	2	3	NA	11	3	0	10	1	5	2	-4	46	NA	-5
Fly7	-3	0	NA	16	1	-2	24		4	-6	12	53	NA	-2
Fly8	-2	0	NA	20	0	4	23	0	12	-2	1	42	NA	1
Fly9	0	-1	NA	13	4	-1	22	0	7	0	2	53	NA	-2
Fly10	-2	0	NA	12	2	2	25	-3	2	-5	2	50	NA	0

## Sheet: Pb1a Analyses
pb1A WT Kruskal-Wallis test	Uncorrected Dunn's test	Mean rank diff.	Significant?	Summary	Individual P Value	A-?
P value <0.0001	propionic acid vs. mineral oil	10.6	No	ns	0.4397	B	propionic acid
Approximate P value	1-octen-3-ol vs. mineral oil	8.5	No	ns	0.5355	C	1-octen-3-ol
P value summary ****	phenylacetaldehyde vs. mineral oil	9.167	No	ns	0.4834	D	phenylacetaldehyde
Medians vary signif. (P < 0.05)? Yes	phenethylamine vs. mineral oil	-15.17	No	ns	0.2462	E	phenethylamine
Number of groups: 14	1,4-diaminobutane (putrescine) vs. mineral oil	-11.4	No	ns	0.4059	F	1,4-diaminobutane (putrescine)
Kruskal-Wallis statistic: 69.29	pyrrolidine vs. mineral oil	-28	Yes	*	0.0412	G	pyrrolidine
Data summary:	methyl salicylate vs. mineral oil	-20.8	No	ns	0.1294	H	methyl salicylate
Number of treatments (columns) = 14	benzaldehyde vs. mineral oil	34.08	Yes	**	0.0092	I	benzaldehyde
Number of values (total) = 78	4-methylphenol (p-cresol) vs. mineral oil	-5.9	No	ns	0.6671	J	4-methylphenol (p-cresol)
Number of families = 1	ethyl acetate vs. mineral oil	37.92	Yes	**	0.0037	K	ethyl acetate
Number of comparisons per family - 13	pentyl acetate vs. mineral oil	13.83	No	ns	0.2902	L	pentyl acetate
Alpha = 0.05	ethyl butyrate vs. mineral oil	37.83	Yes	**	0.0038	M	ethyl butyrate
	2,3-butanedione vs. mineral oil	32	Yes	*	0.0144	N	2,3-butanedione
	Test details	Mean rank 1	Mean rank 2	Mean rank diff.	n1	n2	Z
	propionic acid vs. mineral oil	41.6	31	10.6	5	6	0.7728
	1-octen-3-ol vs. mineral oil	39.5	31	8.5	5	6	0.6197
	phenylacetaldehyde vs. mineral oil	40.17	31	9.167	6	6	0.7009
	phenethylamine vs. mineral oil	15.83	31	-15.17	6	6	1.16
	1,4-diaminobutane (putrescine) vs. mineral oil	19.6	31	-11.4	5	6	0.8311
	pyrrolidine vs. mineral oil	3	31	-28	5	6	2.041
	methyl salicylate vs. mineral oil	10.2	31	-20.8	5	6	1.516
	benzaldehyde vs. mineral oil	65.08	31	34.08	6	6	2.606
	4-methylphenol (p-cresol) vs. mineral oil	25.1	31	-5.9	5	6	0.4301
	ethyl acetate vs. mineral oil	68.92	31	37.92	6	6	2.899
	pentyl acetate vs. mineral oil	44.83	31	13.83	6	6	1.058
	ethyl butyrate vs. mineral oil	68.83	31	37.83	6	6	2.893
	2,3-butanedione vs. mineral oil	63	31	32	6	6	2.447
pb1A Ir25a mut Kruskal-Wallis test	Uncorrected Dunn's test	Mean rank diff.	Significant?	Summary	Individual P Value	A-?
P value <0.0001	propionic acid vs. mineral oil	19.75	No	ns	0.2071	B	propionic acid
Approximate P value	1-octen-3-ol vs. mineral oil	39.88	Yes	*	0.0109	C	1-octen-3-ol
P value summary ****	phenylacetaldehyde vs. mineral oil	26.44	No	ns	0.0913	D	phenylacetaldehyde
Medians vary signif. (P < 0.05)? Yes	phenethylamine vs. mineral oil	-11.69	No	ns	0.4554	E	phenethylamine
Number of groups: 14	1,4-diaminobutane (putrescine) vs. mineral oil	-8.313	No	ns	0.608	F	1,4-diaminobutane (putrescine)
Kruskal-Wallis statistic: 97.46	pyrrolidine vs. mineral oil	-30.81	No	ns	0.0573	G	pyrrolidine
Data summary:	methyl salicylate vs. mineral oil	-18.31	No	ns	0.2585	H	methyl salicylate
Number of treatments (columns) = 14	benzaldehyde vs. mineral oil	60.19	Yes	***	0.0001	I	benzaldehyde
Number of values (total) = 108	4-methylphenol (p-cresol) vs. mineral oil	-6.384	No	ns	0.6936	J	4-methylphenol (p-cresol)
Number of families = 1	ethyl acetate vs. mineral oil	43.94	Yes	**	0.005	K	ethyl acetate
Number of comparisons per family - 13	pentyl acetate vs. mineral oil	25.44	No	ns	0.1042	L	pentyl acetate
Alpha = 0.05	ethyl butyrate vs. mineral oil	61.63	Yes	****	<0.0001	M	ethyl butyrate
	2,3-butanedione vs. mineral oil	56.06	Yes	***	0.0003	N	2,3-butanedione
	Test details	Mean rank 1	Mean rank 2	Mean rank diff.	n1	n2	Z
	propionic acid vs. mineral oil	54.56	34.81	19.75	8	8	1.261
	1-octen-3-ol vs. mineral oil	74.69	34.81	39.88	8	8	2.547
	phenylacetaldehyde vs. mineral oil	61.25	34.81	26.44	8	8	1.689
	phenethylamine vs. mineral oil	23.13	34.81	-11.69	8	8	0.7465
	1,4-diaminobutane (putrescine) vs. mineral oil	26.5	34.81	-8.313	7	8	0.5129
	pyrrolidine vs. mineral oil	4	34.81	-30.81	7	8	1.901
	methyl salicylate vs. mineral oil	16.5	34.81	-18.31	7	8	1.13
	benzaldehyde vs. mineral oil	95	34.81	60.19	8	8	3.844
	4-methylphenol (p-cresol) vs. mineral oil	28.43	34.81	-6.384	7	8	0.3939
	ethyl acetate vs. mineral oil	78.75	34.81	43.94	8	8	2.806
	pentyl acetate vs. mineral oil	60.25	34.81	25.44	8	8	1.625
	ethyl butyrate vs. mineral oil	96.44	34.81	61.63	8	8	3.936
	2,3-butanedione vs. mineral oil	90.88	34.81	56.06	8	8	3.581
pb1a two geno (Mut v WT), Mann Whitney tests	MO	Pentyl acetate	1-octen-3-ol	Propionic acid	Ethyl acetate	Benzaldehyde	2,3-butanedione
P value	0.3899	0.9247	0.0016	0.6542	0.008	0.2641	0.6374
Exact or approximate P value?	Exact	Exact	Exact	Exact	Exact	Exact	Exact
P value summary	ns	ns	**	ns	**	ns	ns
Significantly different (P < 0.05)?	No	No	Yes	No	Yes	No	No
One- or two-tailed P value?	Two-tailed	Two-tailed	Two-tailed	Two-tailed	Two-tailed	Two-tailed	Two-tailed
Sum of ranks in column A,B	52 , 53	44 , 61	15 , 76	31.50 , 59.50	65 , 40	54 , 51	49 , 56
Mann-Whitney U	17	23	0	16.5	4	15	20
Difference between medians:
Median of column A	17.00, n=6	33.00, n=6	28.00, n=5	30.00, n=5	83.50, n=6	75.50, n=6	71.00, n=6
Median of column B	15.00, n=8	35.00, n=8	50.00, n=8	32.50, n=8	63.50, n=8	70.50, n=8	65.50, n=8
Difference: Actual	-2	2	22	2.5	-20	-5	-5.5
Difference: Hodges-Lehmann	-1	0	20.5	2	-24.5	-6	-3.5
pb1a two geno (Mut v WT), Mann Whitney tests	1,4-diaminobutane	Ethyl butyrate	Methyl salicylate	Pyrrolidine	Phenyl acetaldehyde	Phenethylamine	p-cresol
P value	0.4192	0.0743	0.0177	0.1654	0.3933	0.1905	0.7184
Exact or approximate P value?	Exact	Exact	Exact	Exact	Exact	Exact	Exact
P value summary	ns	ns	*	ns	ns	ns	ns
Significantly different (P < 0.05)?	No	No	Yes	No	No	No	No
One- or two-tailed P value?	Two-tailed	Two-tailed	Two-tailed	Two-tailed	Two-tailed	Two-tailed	Two-tailed
Sum of ranks in column A,B	27 , 51	59 , 46	18 , 60	41.50 , 36.50	38 , 67	34.50 , 70.50	30 , 48
Mann-Whitney U	12	10	3	8.5	17	13.5	15
Difference between medians:
Median of column A	9.000, n=5	84.50, n=6	2.000, n=5	-6.000, n=5	32.00, n=6	4.000, n=6	9.000, n=5
Median of column B	11.00, n=7	72.50, n=8	5.000, n=7	-9.000, n=7	36.00, n=8	9.000, n=8	12.00, n=7
Difference: Actual	2	-12	3	-3	4	5	3
Difference: Hodges-Lehmann	2	-8.5	5	-2	6	3	3

## Sheet: Pb1b Analyses
pb1b WT Kruskal-Wallis test	Uncorrected Dunn's test	Mean rank diff.	Significant?	Summary	Individual P Value	A-?
P value 0.0007	Mineral oil vs. Propionic acid	7.733	No	ns	0.3673	B	Propionic acid
Approximate P value	Mineral oil vs. Phenylacetaldehyde	-0.75	No	ns	0.9269	C	Phenylacetaldehyde
P value summary ***	Mineral oil vs. Phenothylamine	-12.67	No	ns	0.1214	D	Phenothylamine
Medians vary signif. (P < 0.05)? Yes	Mineral oil vs. 1-4-Diaminobutane	-9.167	No	ns	0.2852	E	1-4-Diaminobutane
Number of groups: 9	Mineral oil vs. Pyrrolidine	-4.167	No	ns	0.6271	F	Pyrrolidine
Kruskal-Wallis statistic: 27.14	Mineral oil vs. Methyl Salicylate	-7.967	No	ns	0.353	G	Methyl Salicylate
Data summary:	Mineral oil vs. p-Cresol	-25.77	Yes	**	0.0027	H	p-Cresol
Number of treatments (columns) = 9	Mineral oil vs. Pentyl acetate	12.17	No	ns	0.1368	I	Pentyl acetate
Number of values (total) = 49
Number of families = 1	Test details	Mean rank 1	Mean rank 2	Mean rank diff.	n1	n2	Z
Number of comparisons per family - 8	Mineral oil vs. Propionic acid	20.83	13.1	7.733	6	5	0.9016
Alpha = 0.05	Mineral oil vs. Phenylacetaldehyde	20.83	21.58	-0.75	6	6	0.09171
	Mineral oil vs. Phenothylamine	20.83	33.5	-12.67	6	6	1.549
	Mineral oil vs. 1-4-Diaminobutane	20.83	30	-9.167	6	5	1.069
	Mineral oil vs. Pyrrolidine	20.83	25	-4.167	6	5	0.4858
	Mineral oil vs. Methyl Salicylate	20.83	28.8	-7.967	6	5	0.9288
	Mineral oil vs. p-Cresol	20.83	46.6	-25.77	6	5	3.004
	Mineral oil vs. Pentyl acetate	20.83	8.667	12.17	6	6	1.488
pb1b Ir25a Mut Kruskal-Wallis test	Uncorrected Dunn's test	Mean rank diff.	Significant?	Summary	Individual P Value	A-?
P value <0.0001	Mineral oil vs. Propionic acid	-6.313	No	ns	0.5148	B	Propionic acid
Approximate P value	Mineral oil vs. Phenylacetaldehyde	7.313	No	ns	0.4505	C	Phenylacetaldehyde
P value summary ****	Mineral oil vs. Phenothylamine	-10.88	No	ns	0.2618	D	Phenothylamine
Medians vary signif. (P < 0.05)? Yes	Mineral oil vs. 1-4-Diaminobutane	-10.92	No	ns	0.2763	E	1-4-Diaminobutane
Number of groups: 9	Mineral oil vs. Pyrrolidine	-34.56	Yes	***	0.0006	F	Pyrrolidine
Kruskal-Wallis statistic: 46.39	Mineral oil vs. Methyl Salicylate	-24.85	Yes	*	0.0132	G	Methyl Salicylate
Data summary:	Mineral oil vs. p-Cresol	-42.56	Yes	****	<0.0001	H	p-Cresol
Number of treatments (columns) = 9	Mineral oil vs. Pentyl acetate	3.938	No	ns	0.6947	I	Pentyl acetate
Number of values (total) = 67
Number of families = 1	Test details	Mean rank 1	Mean rank 2	Mean rank diff.	n1	n2	Z
Number of comparisons per family - 8	Mineral oil vs. Propionic acid	21.44	27.75	-6.313	8	8	0.6514
Alpha = 0.05	Mineral oil vs. Phenylacetaldehyde	21.44	14.13	7.313	8	8	0.7546
	Mineral oil vs. Phenothylamine	21.44	32.31	-10.88	8	8	1.122
	Mineral oil vs. 1-4-Diaminobutane	21.44	32.36	-10.92	8	7	1.089
	Mineral oil vs. Pyrrolidine	21.44	56	-34.56	8	7	3.446
	Mineral oil vs. Methyl Salicylate	21.44	46.29	-24.85	8	7	2.477
	Mineral oil vs. p-Cresol	21.44	64	-42.56	8	7	4.243
	Mineral oil vs. Pentyl acetate	21.44	17.5	3.938	8	7	0.3925
pb1b two geno (Mut v WT), Mann Whitney tests	MO	Pentyl acetate	p-cresol	Propionic acid	Phenethylamine
P value	0.1299	0.4242	0.9091	>0.9999	0.014
Exact or approximate P value?	Exact	Exact	Exact	Exact	Exact
P value summary	ns	ns	ns	ns	*
Significantly different (P < 0.05)?	No	No	No	No	Yes
One- or two-tailed P value?	Two-tailed	Two-tailed	Two-tailed	Two-tailed	Two-tailed
Sum of ranks in column A,B	57 , 48	48 , 43	33.50 , 44.50	36 , 55	63 , 42
Mann-Whitney U	12	15	16.5	19	6
Difference between medians:
Median of column A	-1.000, n=6	-2.500, n=6	60.00, n=5	-2.000, n=5	2.000, n=6
Median of column B	-2.500, n=8	-5.000, n=7	52.00, n=7	-2.500, n=8	0.000, n=8
Difference: Actual	-1.5	-2.5	-8	-0.5	-2
Difference: Hodges-Lehmann	-2	-1	-3	0	-2
pb1b two geno (Mut v WT), Mann Whitney tests	1,4-diaminobutane	Methyl salicylate	Pyrrolidine	Phenyl acetaldehyde
P value	0.2702	0.4785	0.404	0.0033
Exact or approximate P value?	Exact	Exact	Exact	Exact
P value summary	ns	ns	ns	**
Significantly different (P < 0.05)?	No	No	No	Yes
One- or two-tailed P value?	Two-tailed	Two-tailed	Two-tailed	Two-tailed
Sum of ranks in column A,B	39.50 , 38.50	27.50 , 50.50	27 , 51	66 , 39
Mann-Whitney U	10.5	12.5	12	3
Difference between medians:
Median of column A	1.000, n=5	0.000, n=5	-1.000, n=5	0.000, n=6
Median of column B	-2.000, n=7	2.000, n=7	10.00, n=7	-5.000, n=8
Difference: Actual	-3	2	11	-5
Difference: Hodges-Lehmann	-2	2	7	-4

## Sheet: Pb2a Analyses
pb2A WT Kruskal-Wallis test	Uncorrected Dunn's test	Mean rank diff.	Significant?	Summary	Individual P Value	A-?
P value <0.0001	Mineral oil vs. Propionic acid	-9.071	No	ns	0.5502	B	Propionic acid
Approximate P value	Mineral oil vs. 1-octen-3-ol	-28.93	No	ns	0.0567	C	1-octen-3-ol
P value summary ****	Mineral oil vs. Phenylacetaldehyde	-47.57	Yes	**	0.0017	D	Phenylacetaldehyde
Medians vary signif. (P < 0.05)? Yes	Mineral oil vs. Phenethylamine	-10.29	No	ns	0.4981	E	Phenethylamine
Number of groups: 14	Mineral oil vs. 1-4-Diaminobutane	-11.71	No	ns	0.4404	F	1-4-Diaminobutane
Kruskal-Wallis statistic: 72.09	Mineral oil vs. Pyrrolidine	3.429	No	ns	0.8213	G	Pyrrolidine
Data summary:	Mineral oil vs. Methyl Salicylate	-25	No	ns	0.0996	H	Methyl Salicylate
Number of treatments (columns) = 14	Mineral oil vs. Benzaldehyde	-69.21	Yes	****	<0.0001	I	Benzaldehyde
Number of values (total) = 98	Mineral oil vs. p-Cresol	-55.79	Yes	***	0.0002	J	p-Cresol
Number of families = 1	Mineral oil vs. Ethyl acetate	-42	Yes	**	0.0057	K	Ethyl acetate
Number of comparisons per family - 13	Mineral oil vs. Pentyl acetate	-51.93	Yes	***	0.0006	L	Pentyl acetate
Alpha = 0.05	Mineral oil vs. Ethyl Butyrate	-74.14	Yes	****	<0.0001	M	Ethyl Butyrate
	Mineral oil vs. 2,3 Butanedione	-42.79	Yes	**	0.0048	N	2,3 Butanedione
	Test details	Mean rank 1	Mean rank 2	Mean rank diff.	n1	n2	Z
	Mineral oil vs. Propionic acid	16.29	25.36	-9.071	7	7	0.5975
	Mineral oil vs. 1-octen-3-ol	16.29	45.21	-28.93	7	7	1.905
	Mineral oil vs. Phenylacetaldehyde	16.29	63.86	-47.57	7	7	3.133
	Mineral oil vs. Phenethylamine	16.29	26.57	-10.29	7	7	0.6775
	Mineral oil vs. 1-4-Diaminobutane	16.29	28	-11.71	7	7	0.7716
	Mineral oil vs. Pyrrolidine	16.29	12.86	3.429	7	7	0.2258
	Mineral oil vs. Methyl Salicylate	16.29	41.29	-25	7	7	1.647
	Mineral oil vs. Benzaldehyde	16.29	85.5	-69.21	7	7	4.559
	Mineral oil vs. p-Cresol	16.29	72.07	-55.79	7	7	3.674
	Mineral oil vs. Ethyl acetate	16.29	58.29	-42	7	7	2.766
	Mineral oil vs. Pentyl acetate	16.29	68.21	-51.93	7	7	3.42
	Mineral oil vs. Ethyl Butyrate	16.29	90.43	-74.14	7	7	4.884
	Mineral oil vs. 2,3 Butanedione	16.29	59.07	-42.79	7	7	2.818
pb2A Ir25a mut Kruskal-Wallis test	Uncorrected Dunn's test	Mean rank diff.	Significant?	Summary	Individual P Value	A-?
P value <0.0001	Mineral oil vs. Propionic acid	-6.027	No	ns	0.6936	B	Propionic acid
Approximate P value	Mineral oil vs. 1-octen-3-ol	-8.063	No	ns	0.5854	C	1-octen-3-ol
P value summary ****	Mineral oil vs. Phenylacetaldehyde	-49	Yes	***	0.0009	D	Phenylacetaldehyde
Medians vary signif. (P < 0.05)? Yes	Mineral oil vs. Phenethylamine	-10.17	No	ns	0.5062	E	Phenethylamine
Number of groups: 14	Mineral oil vs. 1-4-Diaminobutane	2.438	No	ns	0.8787	F	1-4-Diaminobutane
Kruskal-Wallis statistic: 78.5	Mineral oil vs. Pyrrolidine	-27.4	No	ns	0.0862	G	Pyrrolidine
Data summary:	Mineral oil vs. Methyl Salicylate	-16.23	No	ns	0.3094	H	Methyl Salicylate
Number of treatments (columns) = 14	Mineral oil vs. Benzaldehyde	-72.81	Yes	****	<0.0001	I	Benzaldehyde
Number of values (total) = 102	Mineral oil vs. p-Cresol	-50.4	Yes	**	0.0016	J	p-Cresol
Number of families = 1	Mineral oil vs. Ethyl acetate	-52.13	Yes	***	0.0004	K	Ethyl acetate
Number of comparisons per family - 13	Mineral oil vs. Pentyl acetate	-57.56	Yes	****	<0.0001	L	Pentyl acetate
Alpha = 0.05	Mineral oil vs. Ethyl Butyrate	-72.44	Yes	****	<0.0001	M	Ethyl Butyrate
	Mineral oil vs. 2,3 Butanedione	-36.25	Yes	*	0.0142	N	2,3 Butanedione
	Test details	Mean rank 1	Mean rank 2	Mean rank diff.	n1	n2	Z
	Mineral oil vs. Propionic acid	17.69	23.71	-6.027	8	7	0.3939
	Mineral oil vs. 1-octen-3-ol	17.69	25.75	-8.063	8	8	0.5455
	Mineral oil vs. Phenylacetaldehyde	17.69	66.69	-49	8	8	3.315
	Mineral oil vs. Phenethylamine	17.69	27.86	-10.17	8	7	0.6647
	Mineral oil vs. 1-4-Diaminobutane	17.69	15.25	2.438	8	6	0.1527
	Mineral oil vs. Pyrrolidine	17.69	45.08	-27.4	8	6	1.716
	Mineral oil vs. Methyl Salicylate	17.69	33.92	-16.23	8	6	1.017
	Mineral oil vs. Benzaldehyde	17.69	90.5	-72.81	8	8	4.926
	Mineral oil vs. p-Cresol	17.69	68.08	-50.4	8	6	3.157
	Mineral oil vs. Ethyl acetate	17.69	69.81	-52.13	8	8	3.527
	Mineral oil vs. Pentyl acetate	17.69	75.25	-57.56	8	8	3.894
	Mineral oil vs. Ethyl Butyrate	17.69	90.13	-72.44	8	8	4.901
	Mineral oil vs. 2,3 Butanedione	17.69	53.94	-36.25	8	8	2.453
pb2a two geno (Mut v WT), Mann Whitney tests	MO	Pentyl acetate	1-octen-3-ol	Propionic acid	Ethyl acetate	Benzaldehyde	2,3-butanedione
P value	0.7975	0.5924	0.1787	0.8928	0.8044	0.2587	0.136
Exact or approximate P value?	Exact	Exact	Exact	Exact	Exact	Exact	Exact
P value summary	ns	ns	ns	ns	ns	ns	ns
Significantly different (P < 0.05)?	No	No	No	No	No	No	No
One- or two-tailed P value?	Two-tailed	Two-tailed	Two-tailed	Two-tailed	Two-tailed	Two-tailed	Two-tailed
Sum of ranks in column A,B	53.50 , 66.50	61 , 59	68 , 52	51 , 54	53.50 , 66.50	66 , 54	69 , 51
Mann-Whitney U	25.5	23	16	23	25.5	18	15
Difference between medians:
Median of column A	-2.000, n=7	22.00, n=7	13.00, n=7	-1.000, n=7	12.00, n=7	23.00, n=7	14.00, n=7
Median of column B	-1.500, n=8	15.50, n=8	-0.5000, n=8	0.000, n=7	11.50, n=8	22.00, n=8	8.000, n=8
Difference: Actual	0.5	-6.5	-13.5	1	-0.5	-1	-6
Difference: Hodges-Lehmann	0.5	-5.5	-7	0	1	-2.5	-5
pb2a two geno (Mut v WT), Mann Whitney tests	1,4-diaminobutane	Ethyl butyrate	Methyl salicylate	Pyrrolidine	Phenyl acetaldehyde	Phenethylamine	p-cresol
P value	0.0303	0.002	0.2745	0.0932	0.9764	0.7855	0.1096
Exact or approximate P value?	Exact	Exact	Exact	Exact	Exact	Exact	Exact
P value summary	*	**	ns	ns	ns	ns	ns
Significantly different (P < 0.05)?	Yes	Yes	No	No	No	No	No
One- or two-tailed P value?	Two-tailed	Two-tailed	Two-tailed	Two-tailed	Two-tailed	Two-tailed	Two-tailed
Sum of ranks in column A,B	64 , 27	80.50 , 39.50	57 , 34	37 , 54	56.50 , 63.50	50 , 55	60.50 , 30.50
Mann-Whitney U	6	3.5	13	9	27.5	22	9.5
Difference between medians:
Median of column A	0.000, n=7	28.00, n=7	4.000, n=7	-6.000, n=7	12.00, n=7	0.000, n=7	19.00, n=7
Median of column B	-2.500, n=6	22.00, n=8	2.000, n=6	7.000, n=6	12.50, n=8	1.000, n=7	12.00, n=6
Difference: Actual	-2.5	-6	-2	13	0.5	1	-7
Difference: Hodges-Lehmann	-3	-7.5	-2.5	12	0	0	-5

## Sheet: Pb2b Analyses
pb2B WT Kruskal-Wallis test	Uncorrected Dunn's test	Mean rank diff.	Significant?	Summary	Individual P Value	A-?
P value <0.0001	1. Mineral oil vs. 10. Propionic acid	6.143	No	ns	0.685	B	10. Propionic acid
Approximate P value	1. Mineral oil vs. 6. 1-octen-3-ol	53.5	Yes	***	0.0004	C	6. 1-octen-3-ol
P value summary ****	1. Mineral oil vs. 8. Phenylacetaldehyde	25.36	No	ns	0.094	D	8. Phenylacetaldehyde
Medians vary signif. (P < 0.05)? Yes	1. Mineral oil vs. 9. Phenothylamine	5.143	No	ns	0.7341	E	9. Phenothylamine
Number of groups: 14	1. Mineral oil vs. 11. 1-4-Diaminobutane	-3.786	No	ns	0.8026	F	11. 1-4-Diaminobutane
Kruskal-Wallis statistic: 76.2	1. Mineral oil vs. 12. Pyrrolidine	25.79	No	ns	0.0886	G	12. Pyrrolidine
Data summary:	1. Mineral oil vs. 14. Methyl Salicylate	0.2143	No	ns	0.9887	H	14. Methyl Salicylate
Number of treatments (columns) = 14	1. Mineral oil vs. 4. Benzaldehyde	-26.93	No	ns	0.0754	I	4. Benzaldehyde
Number of values (total) = 98	1. Mineral oil vs. 13. p-Cresol	-27.64	No	ns	0.0679	J	13. p-Cresol
Number of families = 1	1. Mineral oil vs. 2. Ethyl acetate	19.64	No	ns	0.1946	K	2. Ethyl acetate
Number of comparisons per family - 13	1. Mineral oil vs. 3. Pentyl acetate	43.57	Yes	**	0.004	L	3. Pentyl acetate
Alpha = 0.05	1. Mineral oil vs. 5. Ethyl Butyrate	50.64	Yes	***	0.0008	M	5. Ethyl Butyrate
	1. Mineral oil vs. 7. 2,3 Butanedione	34.36	Yes	*	0.0233	N	7. 2,3 Butanedione
	Test details	Mean rank 1	Mean rank 2	Mean rank diff.	n1	n2	Z
	1. Mineral oil vs. 10. Propionic acid	64.21	58.07	6.143	7	7	0.4057
	1. Mineral oil vs. 6. 1-octen-3-ol	64.21	10.71	53.5	7	7	3.533
	1. Mineral oil vs. 8. Phenylacetaldehyde	64.21	38.86	25.36	7	7	1.675
	1. Mineral oil vs. 9. Phenothylamine	64.21	59.07	5.143	7	7	0.3396
	1. Mineral oil vs. 11. 1-4-Diaminobutane	64.21	68	-3.786	7	7	0.25
	1. Mineral oil vs. 12. Pyrrolidine	64.21	38.43	25.79	7	7	1.703
	1. Mineral oil vs. 14. Methyl Salicylate	64.21	64	0.2143	7	7	0.01415
	1. Mineral oil vs. 4. Benzaldehyde	64.21	91.14	-26.93	7	7	1.778
	1. Mineral oil vs. 13. p-Cresol	64.21	91.86	-27.64	7	7	1.825
	1. Mineral oil vs. 2. Ethyl acetate	64.21	44.57	19.64	7	7	1.297
	1. Mineral oil vs. 3. Pentyl acetate	64.21	20.64	43.57	7	7	2.877
	1. Mineral oil vs. 5. Ethyl Butyrate	64.21	13.57	50.64	7	7	3.344
	1. Mineral oil vs. 7. 2,3 Butanedione	64.21	29.86	34.36	7	7	2.269
pb2B Ir25a mut Kruskal-Wallis test	Uncorrected Dunn's test	Mean rank diff.	Significant?	Summary	Individual P Value	A-?
P value <0.0001	1. Mineral oil vs. 10. Propionic acid	-4.42	No	ns	0.7722	B	10. Propionic acid
Approximate P value	1. Mineral oil vs. 6. 1-octen-3-ol	45.5	Yes	**	0.002	C	6. 1-octen-3-ol
P value summary ****	1. Mineral oil vs. 8. Phenylacetaldehyde	6.813	No	ns	0.6441	D	8. Phenylacetaldehyde
Medians vary signif. (P < 0.05)? Yes	1. Mineral oil vs. 9. Phenothylamine	-1.777	No	ns	0.9073	E	9. Phenothylamine
Number of groups: 14	1. Mineral oil vs. 11. 1-4-Diaminobutane	-8.396	No	ns	0.5981	F	11. 1-4-Diaminobutane
Kruskal-Wallis statistic: 70.8	1. Mineral oil vs. 12. Pyrrolidine	35.85	Yes	*	0.0244	G	12. Pyrrolidine
Data summary:	1. Mineral oil vs. 14. Methyl Salicylate	-2.313	No	ns	0.8846	H	14. Methyl Salicylate
Number of treatments (columns) = 14	1. Mineral oil vs. 4. Benzaldehyde	-35.25	Yes	*	0.0168	I	4. Benzaldehyde
Number of values (total) = 102	1. Mineral oil vs. 13. p-Cresol	-39.48	Yes	*	0.0132	J	13. p-Cresol
Number of families = 1	1. Mineral oil vs. 2. Ethyl acetate	22.19	No	ns	0.1324	K	2. Ethyl acetate
Number of comparisons per family - 13	1. Mineral oil vs. 3. Pentyl acetate	18.13	No	ns	0.219	L	3. Pentyl acetate
Alpha = 0.05	1. Mineral oil vs. 5. Ethyl Butyrate	43.69	Yes	**	0.003	M	5. Ethyl Butyrate
	1. Mineral oil vs. 7. 2,3 Butanedione	3.563	No	ns	0.8091	N	7. 2,3 Butanedione
	Test details	Mean rank 1	Mean rank 2	Mean rank diff.	n1	n2	Z
	1. Mineral oil vs. 10. Propionic acid	58.44	62.86	-4.42	8	7	0.2896
	1. Mineral oil vs. 6. 1-octen-3-ol	58.44	12.94	45.5	8	8	3.086
	1. Mineral oil vs. 8. Phenylacetaldehyde	58.44	51.63	6.813	8	8	0.462
	1. Mineral oil vs. 9. Phenothylamine	58.44	60.21	-1.777	8	7	0.1164
	1. Mineral oil vs. 11. 1-4-Diaminobutane	58.44	66.83	-8.396	8	6	0.5271
	1. Mineral oil vs. 12. Pyrrolidine	58.44	22.58	35.85	8	6	2.251
	1. Mineral oil vs. 14. Methyl Salicylate	58.44	60.75	-2.313	8	6	0.1452
	1. Mineral oil vs. 4. Benzaldehyde	58.44	93.69	-35.25	8	8	2.391
	1. Mineral oil vs. 13. p-Cresol	58.44	97.92	-39.48	8	6	2.479
	1. Mineral oil vs. 2. Ethyl acetate	58.44	36.25	22.19	8	8	1.505
	1. Mineral oil vs. 3. Pentyl acetate	58.44	40.31	18.13	8	8	1.229
	1. Mineral oil vs. 5. Ethyl Butyrate	58.44	14.75	43.69	8	8	2.963
	1. Mineral oil vs. 7. 2,3 Butanedione	58.44	54.88	3.563	8	8	0.2416
pb2B two geno (Mut v WT), Mann Whitney tests	MO	Pentyl acetate	1-octen-3-ol	Propionic acid	Ethyl acetate	Benzaldehyde	2,3-butanedione
P value	0.8957	0.0272	0.2328	0.69	0.9806	0.2904	0.0157
Exact or approximate P value?	Exact	Exact	Exact	Exact	Exact	Exact	Exact
P value summary	ns	*	ns	ns	ns	ns	*
Significantly different (P < 0.05)?	No	Yes	No	No	No	No	Yes
One- or two-tailed P value?	Two-tailed	Two-tailed	Two-tailed	Two-tailed	Two-tailed	Two-tailed	Two-tailed
Sum of ranks in column A,B	57.50 , 62.50	37 , 83	45.50 , 74.50	49 , 56	56.50 , 63.50	65.50 , 54.50	35.50 , 84.50
Mann-Whitney U	26.5	9	17.5	21	27.5	18.5	7.5
Difference between medians:
Median of column A	0.000, n=7	-7.000, n=7	-12.00, n=7	0.000, n=7	-4.000, n=7	48.00, n=7	-5.000, n=7
Median of column B	-1.000, n=8	-3.500, n=8	-7.000, n=8	-1.000, n=7	-3.000, n=8	43.00, n=8	-1.500, n=8
Difference: Actual	-1	3.5	5	-1	1	-5	3.5
Difference: Hodges-Lehmann	0	4	4	1	0	-5	4.5
pb2B two geno (Mut v WT), Mann Whitney tests	1,4-diaminobutane	Ethyl butyrate	Methyl salicylate	Pyrrolidine	Phenyl acetaldehyde	Phenethylamine	p-cresol
P value	0.7879	0.4084	0.8054	0.6113	0.1253	0.6498	0.4674
Exact or approximate P value?	Exact	Exact	Exact	Exact	Exact	Exact	Exact
P value summary	ns	ns	ns	ns	ns	ns	ns
Significantly different (P < 0.05)?	No	No	No	No	No	No	No
One- or two-tailed P value?	Two-tailed	Two-tailed	Two-tailed	Two-tailed	Two-tailed	Two-tailed	Two-tailed
Sum of ranks in column A,B	51.50 , 39.50	48.50 , 71.50	51 , 40	53 , 38	42.50 , 77.50	48.50 , 56.50	43.50 , 47.50
Mann-Whitney U	18.5	20.5	19	17	14.5	20.5	15.5
Difference between medians:
Median of column A	0.000, n=7	-10.00, n=7	0.000, n=7	-6.000, n=7	-4.000, n=7	-2.000, n=7	50.00, n=7
Median of column B	0.000, n=6	-6.500, n=8	-1.000, n=6	-5.000, n=6	-2.000, n=8	-1.000, n=7	55.00, n=6
Difference: Actual	0	3.5	-1	1	2	1	5
Difference: Hodges-Lehmann	0	1.5	0	-1	3	0	4

## Sheet: Pb3a Analyses
pb3A WT Kruskal-Wallis test	Uncorrected Dunn's test	Mean rank diff.	Significant?	Summary	Individual P Value	A-?
P value <0.0001	1. Mineral oil vs. 10. Propionic acid	-4.083	No	ns	0.7989	B	10. Propionic acid
Approximate P value	1. Mineral oil vs. 6. 1-octen-3-ol	-54.56	Yes	***	0.0001	C	6. 1-octen-3-ol
P value summary ****	1. Mineral oil vs. 8. Phenylacetaldehyde	-7.786	No	ns	0.6115	D	8. Phenylacetaldehyde
Medians vary signif. (P < 0.05)? Yes	1. Mineral oil vs. 9. Phenothylamine	0.4167	No	ns	0.9793	E	9. Phenothylamine
Number of groups: 14	1. Mineral oil vs. 11. 1-4-Diaminobutane	6.333	No	ns	0.6928	F	11. 1-4-Diaminobutane
Kruskal-Wallis statistic: 69.61	1. Mineral oil vs. 12. Pyrrolidine	3	No	ns	0.8515	G	12. Pyrrolidine
Data summary:	1. Mineral oil vs. 14. Methyl Salicylate	-32.75	Yes	*	0.041	H	14. Methyl Salicylate
Number of treatments (columns) = 14	1. Mineral oil vs. 4. Benzaldehyde	-9.278	No	ns	0.5175	I	4. Benzaldehyde
Number of values (total) = 105	1. Mineral oil vs. 13. p-Cresol	11.08	No	ns	0.4893	J	13. p-Cresol
Number of families = 1	1. Mineral oil vs. 2. Ethyl acetate	-1.611	No	ns	0.9105	K	2. Ethyl acetate
Number of comparisons per family - 13	1. Mineral oil vs. 3. Pentyl acetate	-48.67	Yes	***	0.0007	L	3. Pentyl acetate
Alpha = 0.05	1. Mineral oil vs. 5. Ethyl Butyrate	-64.78	Yes	****	<0.0001	M	5. Ethyl Butyrate
	1. Mineral oil vs. 7. 2,3 Butanedione	-3.063	No	ns	0.8358	N	7. 2,3 Butanedione
	Test details	Mean rank 1	Mean rank 2	Mean rank diff.	n1	n2	Z
	1. Mineral oil vs. 10. Propionic acid	36	40.08	-4.083	9	6	0.2547
	1. Mineral oil vs. 6. 1-octen-3-ol	36	90.56	-54.56	9	9	3.805
	1. Mineral oil vs. 8. Phenylacetaldehyde	36	43.79	-7.786	9	7	0.508
	1. Mineral oil vs. 9. Phenothylamine	36	35.58	0.4167	9	6	0.02599
	1. Mineral oil vs. 11. 1-4-Diaminobutane	36	29.67	6.333	9	6	0.3951
	1. Mineral oil vs. 12. Pyrrolidine	36	33	3	9	6	0.1872
	1. Mineral oil vs. 14. Methyl Salicylate	36	68.75	-32.75	9	6	2.043
	1. Mineral oil vs. 4. Benzaldehyde	36	45.28	-9.278	9	9	0.6471
	1. Mineral oil vs. 13. p-Cresol	36	24.92	11.08	9	6	0.6915
	1. Mineral oil vs. 2. Ethyl acetate	36	37.61	-1.611	9	9	0.1124
	1. Mineral oil vs. 3. Pentyl acetate	36	84.67	-48.67	9	9	3.395
	1. Mineral oil vs. 5. Ethyl Butyrate	36	100.8	-64.78	9	9	4.518
	1. Mineral oil vs. 7. 2,3 Butanedione	36	39.06	-3.063	9	8	0.2072
pb3A Ir25a mut Kruskal-Wallis test	Uncorrected Dunn's test	Mean rank diff.	Significant?	Summary	Individual P Value	A-?
P value <0.0001	1. Mineral oil vs. 10. Propionic acid	-33.24	No	ns	0.0509	B	10. Propionic acid
Approximate P value	1. Mineral oil vs. 6. 1-octen-3-ol	-83.35	Yes	****	<0.0001	C	6. 1-octen-3-ol
P value summary ****	1. Mineral oil vs. 8. Phenylacetaldehyde	-30.18	No	ns	0.0762	D	8. Phenylacetaldehyde
Medians vary signif. (P < 0.05)? Yes	1. Mineral oil vs. 9. Phenothylamine	-9.683	No	ns	0.5695	E	9. Phenothylamine
Number of groups: 14	1. Mineral oil vs. 11. 1-4-Diaminobutane	-4.288	No	ns	0.8073	F	11. 1-4-Diaminobutane
Kruskal-Wallis statistic: 94.74	1. Mineral oil vs. 12. Pyrrolidine	10.71	No	ns	0.5422	G	12. Pyrrolidine
Data summary:	1. Mineral oil vs. 14. Methyl Salicylate	-41.35	Yes	*	0.0235	H	14. Methyl Salicylate
Number of treatments (columns) = 14	1. Mineral oil vs. 4. Benzaldehyde	-25.05	No	ns	0.1306	I	4. Benzaldehyde
Number of values (total) = 128	1. Mineral oil vs. 13. p-Cresol	1.838	No	ns	0.9167	J	13. p-Cresol
Number of families = 1	1. Mineral oil vs. 2. Ethyl acetate	-32.35	No	ns	0.0509	K	2. Ethyl acetate
Number of comparisons per family - 13	1. Mineral oil vs. 3. Pentyl acetate	-74.65	Yes	****	<0.0001	L	3. Pentyl acetate
Alpha = 0.05	1. Mineral oil vs. 5. Ethyl Butyrate	-93.55	Yes	****	<0.0001	M	5. Ethyl Butyrate
	1. Mineral oil vs. 7. 2,3 Butanedione	-49	Yes	**	0.0031	N	7. 2,3 Butanedione
	Test details	Mean rank 1	Mean rank 2	Mean rank diff.	n1	n2	Z
	1. Mineral oil vs. 10. Propionic acid	29.65	62.89	-33.24	10	9	1.953
	1. Mineral oil vs. 6. 1-octen-3-ol	29.65	113	-83.35	10	10	5.03
	1. Mineral oil vs. 8. Phenylacetaldehyde	29.65	59.83	-30.18	10	9	1.773
	1. Mineral oil vs. 9. Phenothylamine	29.65	39.33	-9.683	10	9	0.5688
	1. Mineral oil vs. 11. 1-4-Diaminobutane	29.65	33.94	-4.288	10	8	0.244
	1. Mineral oil vs. 12. Pyrrolidine	29.65	18.94	10.71	10	8	0.6096
	1. Mineral oil vs. 14. Methyl Salicylate	29.65	71	-41.35	10	7	2.265
	1. Mineral oil vs. 4. Benzaldehyde	29.65	54.7	-25.05	10	10	1.512
	1. Mineral oil vs. 13. p-Cresol	29.65	27.81	1.838	10	8	0.1046
	1. Mineral oil vs. 2. Ethyl acetate	29.65	62	-32.35	10	10	1.952
	1. Mineral oil vs. 3. Pentyl acetate	29.65	104.3	-74.65	10	10	4.505
	1. Mineral oil vs. 5. Ethyl Butyrate	29.65	123.2	-93.55	10	10	5.646
	1. Mineral oil vs. 7. 2,3 Butanedione	29.65	78.65	-49	10	10	2.957
pb3a two geno (Mut v WT), Mann Whitney tests	MO	Pentyl acetate	1-octen-3-ol	Propionic acid	Ethyl acetate	Benzaldehyde	2,3-butanedione
P value	0.2844	0.1363	0.009	0.188	0.1606	>0.9999	0.0217
Exact or approximate P value?	Exact	Exact	Exact	Exact	Exact	Exact	Exact
P value summary	ns	ns	**	ns	ns	ns	*
Significantly different (P < 0.05)?	No	No	Yes	No	No	No	Yes
One- or two-tailed P value?	Two-tailed	Two-tailed	Two-tailed	Two-tailed	Two-tailed	Two-tailed	Two-tailed
Sum of ranks in column A,B	103.5 , 86.50	71.50 , 118.5	59 , 131	36.50 , 83.50	72.50 , 117.5	90 , 100	50.50 , 120.5
Mann-Whitney U	31.5	26.5	14	15.5	27.5	45	14.5
Difference between medians:
Median of column A	1.000, n=9	32.00, n=9	38.00, n=9	2.500, n=6	1.000, n=9	4.000, n=9	1.500, n=8
Median of column B	-1.000, n=10	38.00, n=10	52.00, n=10	5.000, n=9	5.000, n=10	4.500, n=10	12.00, n=10
Difference: Actual	-2	6	14	2.5	4	0.5	10.5
Difference: Hodges-Lehmann	-2	6	12	4	4.5	0	9
pb3a two geno (Mut v WT), Mann Whitney tests	1,4-diaminobutane	Ethyl butyrate	Methyl salicylate	Pyrrolidine	Phenyl acetaldehyde	Phenethylamine	p-cresol
P value	>0.9999	0.8886	0.4988	0.1319	0.5825	0.8464	0.9727
Exact or approximate P value?	Exact	Exact	Exact	Exact	Exact	Exact	Exact
P value summary	ns	ns	ns	ns	ns	ns	ns
Significantly different (P < 0.05)?	No	No	No	No	No	No	No
One- or two-tailed P value?	Two-tailed	Two-tailed	Two-tailed	Two-tailed	Two-tailed	Two-tailed	Two-tailed
Sum of ranks in column A,B	45 , 60	88 , 102	47 , 44	57 , 48	54 , 82	50 , 70	45.50 , 59.50
Mann-Whitney U	24	43	16	12	26	25	23.5
Difference between medians:
Median of column A	-0.5000, n=6	69.00, n=9	8.000, n=6	0.000, n=6	3.000, n=7	1.500, n=6	-1.000, n=6
Median of column B	-0.5000, n=8	70.00, n=10	7.000, n=7	-2.500, n=8	4.000, n=9	1.000, n=9	-2.000, n=8
Difference: Actual	0	1	-1	-2.5	1	-0.5	-1
Difference: Hodges-Lehmann	0	2	-1	-3	1	-0.5	0

[truncated: 1 more sheets: Pb3b Analyses]
