# Supplementary material for: Chemoreceptor co-expression in Drosophila melanogaster olfactory neurons
Source: eLife. 2022 Apr 20;11:e72599. doi: 10.7554/eLife.72599 (PMC9020824; doi:10.7554/eLife.72599)
Supplement: Table 1—source data 1. [file elife-72599-table1-data1.xlsx]

## Sheet: HACK knock-in screen + analyses
Direct Injection Approach								Cross Approach
Target Gene	Founder	mCherry+	mCherry-	All Flies	Efficiency (%)	Fertile Founders Producing KI (%)		Target Gene	Founder	mCherry+	mCherry-	All Flies	Efficiency (%)	Fertile Founders Producing Knock-in (%)
Ir8a	M1	0	33	33	0	0		Ir25a	M3M2	27	57	84	32.1429	1
Ir8a	M2	0	0	0	I.F.			Ir25a	M11M1*	3	38	41	7.31707	1
Ir8a	M3	4	31	35	11.4286	1		Ir25a	TOTALS:	30	95	125	24	1
Ir8a	M4	0	0	0	I.F.			Orco	M1M1*	21	5	26	80.7692	1
Ir8a	M5	0	35	35	0	0		Orco	M22M1	13	86	99	13.1313	1
Ir8a	M6	39	10	49	79.5918	1		Orco	M29M1	3	5	8	37.5	1
Ir8a	M7	0	0	0	I.F.			Orco	TOTALS:	37	96	133	27.8195	1
Ir8a	M8	0	0	0	I.F.				*Used to establish line
Ir8a	M9	0	0	0	I.F.				Produced false positives (see below)
Ir8a	M10	9	3	12	75	1
Ir8a	M11	0	46	46	0	0		Summary of HACKing Efficiency
Ir8a	M12	0	0	0	I.F.			Target Gene	Approach	mCherry+	mCherry-	All Flies	Efficiency (%)	Fertile Founders Producing Knock-in (%)
Ir8a	M13	0	28	28	0	0		Ir8a	Direct Injection	53	609	662	8.00604	0.2
Ir8a	M14	0	0	0	I.F.			Ir25a	Direct Injection	82	268	350	23.4286	0.4
Ir8a	M15	0	0	0	I.F.			Orco	Direct Injection	180	365	545	33.0275	0.428571
Ir8a	M16	1	15	16	6.25	1		Ir76b	Direct Injection	79	184	263	30.038	1
Ir8a	M17	0	0	0	I.F.			Ir25a	Cross	30	95	125	24	1
Ir8a	M18	0	34	34	0	0		Orco	Cross	37	96	133	27.8195	1
Ir8a	M19	0	24	24	0	0
Ir8a	M20	0	0	0	I.F.			Summary of Knock-in Validation
Ir8a	M21	0	45	45	0	0		Target Gene	Approach	Knock-ins Sampled	False Positives	Confirmed	Correct (%)
Ir8a	M22	0	0	0	I.F.			Ir8a	Direct Injection	5	0	5	1
Ir8a	M23	0	45	45	0	0		Ir25a	Direct Injection	6	0	6	1
Ir8a	M24	0	0	0	I.F.			Orco	Direct Injection	30	0	30	1
Ir8a	M25	0	0	0	I.F.			Ir76b	Direct Injection	10	0	10	1
Ir8a	M26	0	42	42	0	0		Ir25a	Cross	30	5	25	0.833333
Ir8a	M27	0	0	0	I.F.			Orco	Cross	2	1	1	0.5
Ir8a	M28	0	41	41	0	0
Ir8a	M29	0	28	28	0	0
Ir8a	M30	0	31	31	0	0
Ir8a	M31	0	0	0	I.F.
Ir8a	M32	0	0	0	I.F.
Ir8a	M33	0	35	35	0	0
Ir8a	M34	0	41	41	0	0
Ir8a	M35	0	0	0	I.F.
Ir8a	M36	0	0	0	I.F.
Ir8a	M37	0	9	9	0	0
Ir8a	M38	0	33	33	0	0
Ir8a	TOTALS:	53	609	662	8.00604	0.2
Ir25a	A	0	72	72	0	0
Ir25a	B	0	74	74	0	0
Ir25a	C	32	46	78	41.0256	1
Ir25a	D	50	18	68	73.5294	1
Ir25a	E	0	58	58	0	0
Ir25a	TOTALS:	82	268	350	23.4286	0.4
Orco	A	116	0	116	100	1
Orco	B	0	157	157	0	0
Orco	C	0	60	60	0	0
Orco	D	0	122	122	0	0
Orco	E	46	0	46	100	1
Orco	F	0	0	0	I.F.
Orco	G	0	0	0	I.F.
Orco	H	0	21	21	0	0
Orco	I	18	5	23	78.2609	1
Orco	TOTALS:	180	365	545	33.0275	0.428571
Ir76b	M2	16	146	162	9.87654	1
Ir76b	M3	0	0	0	I.F.
Ir76b	M4	63	38	101	62.3762	1
Ir76b	TOTALS:	79	184	263	30.038	1
Target Gene	Founder	mCherry+	mCherry-	All Flies	Efficiency (%)	% Fertile Founders Producing KI
					I.F. = Infertile
					#I.F.
				Ir8a	18
				Ir25a	0
				Orco	2
				Ir76b	1
